# Supplementary material for: SENSING SWEET SPOTS: A comprehensive study of SARS-CoV-2-binding lectins
Source: Research Square preprint supplement (doi:10.21203/rs.3.rs-5022883/v1), 2024-09-09
Supplement: Supplementary file 1 [file 2a1988417d3a833a9f9df41f.pdf]

## **SENSING SWEET SPOTS: A comprehensive study of SARS-CoV-2-binding lectins**

**Neetu<sup>1,2,#</sup>, Shimona Ahlawat<sup>1,2,#</sup>, Rathina Delipan<sup>1</sup>, Rajesh P. Ringe<sup>1</sup>, Alka Rao<sup>1,2,3\*</sup> and T.N.C. Ramya<sup>1,2,\*</sup>**

<sup>1</sup>*CSIR- Institute of Microbial Technology, Sector 39-A, Chandigarh 160036, INDIA*

<sup>2</sup>*Academy of Scientific & Innovative Research (AcSIR), Ghaziabad, Uttar Pradesh 201002, INDIA*

<sup>3</sup> *Present address: Food Safety and Standards Authority of India (FSSAI), New Delhi 110002, India*

*#These authors contributed equally to the work and should be considered joint first authors*

*\*Corresponding authors' e-mail: [ramya@imtech.res.in](mailto:ramya@imtech.res.in), [raoalka@imtech.res.in](mailto:raoalka@imtech.res.in)*

**Running Title:** Lectins that bind to SARS-CoV-2 Spike

**Keywords:** SARS-CoV-2, COVID-19, lectins, Spike, glycosylation, lectin array, O-glycans

This supplementary data .pdf file contains four supplementary Figures, S1-S4.

A Supplementary Data 1 zipped folder of all the lectin models described in the paper, and a .xlsx Supplementary Data 2 file containing all the source data behind the graphs in the manuscript also accompany this manuscript as supplementary data.

**Figure S1**

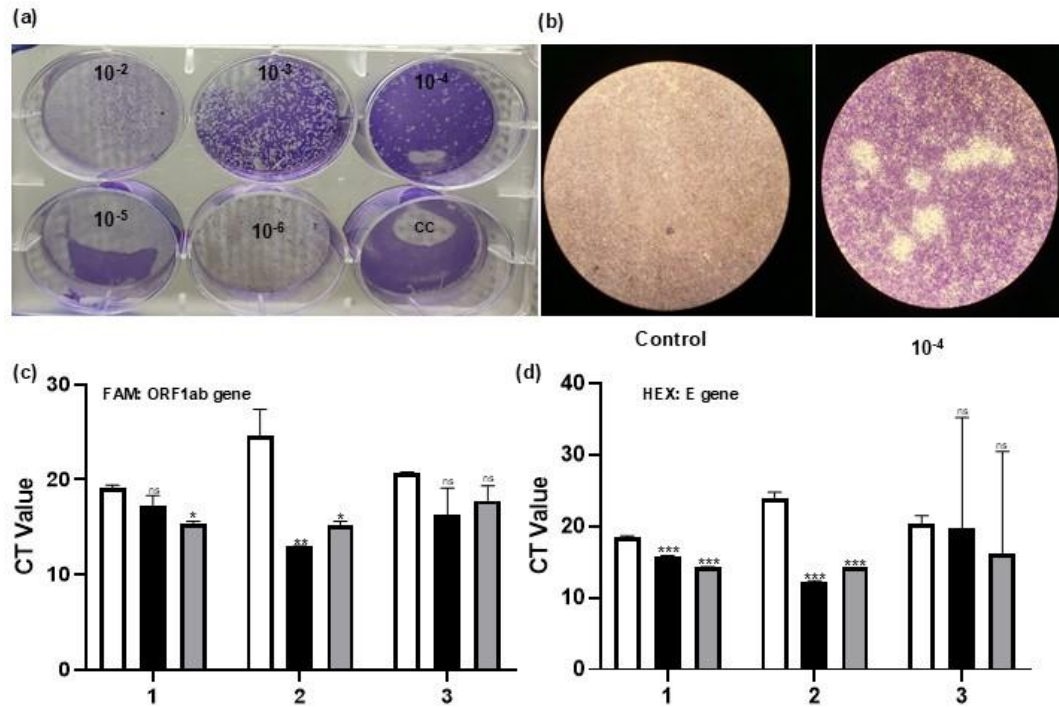

**Figure S1: Propagation and quantitation of enriched SARS-CoV-2.** (a) Quantification of SARS-CoV-2 virus titer propagated in Vero E6 cells. The plaque assay was performed with different dilutions of virus (ranging from  $10^{-2}$  to  $10^{-6}$ ) along with uninfected Vero E6 control (CC) in a 6-well plate (72 plaques were observed in dilution  $10^{-4}$ , hence the titer was calculated to be  $1.8 \times 10^6$  PFU/ml) (b) Plaques observed at 10X magnification (uninfected Vero E6 control and virus plated at  $10^{-4}$  dilution) (c,d) RT-PCR to verify enrichment of virus in three biological replicates (referred to as 1, 2, and 3 on the x-axis). Un-enriched virus is indicated by white bars, PEG-enriched virus is indicated by black bars and Dynabead kit-enriched virus is indicated by grey bars. The RT-PCR Ct values were calculated for FAM representing the ORF1ab gene of SARS-CoV-2 (c) as well as for HEX representing the E gene of SARS Virus (d), and the RT-PCR was performed with three technical replicates for each biological replicate. Error bars show standard deviation. “ns” indicates non-significant ( $P > 0.05$ ), \* indicates  $P \leq 0.05$ , \*\* indicates  $P \leq 0.01$ , and \*\*\* indicates  $P \leq 0.003$ .

**Figure S2**

(a)

| Lectins   | N-core | O-Core | N-Ext | O-Ext |
|-----------|--------|--------|-------|-------|
| AAA       | No     | Yes    | No    | Yes   |
| AAL       | Yes    | No     | Yes   | Yes   |
| ABA       | Yes    | No     | Yes   | Yes   |
| ACA/ACL   | No     | Yes    | Yes   | Yes   |
| ACG       | No     | Yes    | Yes   | Yes   |
| AMA       | Yes    | No     | Yes   | No    |
| ASA       | Yes    | No     | Yes   | No    |
| Banlec    | Yes    | No     | Yes   | No    |
| BC2L-A    | Yes    | No     | Yes   | No    |
| BC2LCN    | Yes    | No     | No    | No    |
| BPA       | No     | Yes    | Yes   | Yes   |
| BSL/GS-II | Yes    | No     | No    | No    |
| CA        | Yes    | No     | Yes   | No    |
| CAA       | Yes    | No     | Yes   | No    |
| CGL2      | No     | No     | Yes   | No    |
| CNL       | No     | Yes    | Yes   | Yes   |
| ConA      | Yes    | No     | Yes   | No    |
| CSA       | No     | Yes    | No    | No    |
| DBA       | No     | Yes    | Yes   | Yes   |
| DSA       | Yes    | No     | No    | No    |
| ECA       | No     | No     | Yes   | No    |
| EEL       | No     | No     | Yes   | No    |
| GAL1      | No     | No     | Yes   | No    |
| GAL3      | No     | No     | Yes   | No    |
| GAL7      | No     | No     | Yes   | No    |
| GAL9      | No     | No     | Yes   | Yes   |
| GNA       | Yes    | No     | No    | No    |
| GS-I      | No     | No     | No    | Yes   |
| HAA       | No     | Yes    | Yes   | Yes   |
| HHA       | Yes    | No     | Yes   | No    |
| Jacalin   | No     | Yes    | No    | Yes   |
| LBA       | Yes    | No     | Yes   | Yes   |
| LCA       | Yes    | No     | No    | No    |
| LEA       | Yes    | No     | No    | Yes   |
| LPA       | No     | No     | Yes   | No    |
| LTL       | Yes    | No     | Yes   | Yes   |
| MAL-1/MAA | No     | No     | Yes   | Yes   |
| MNA-G     | Yes    | No     | Yes   | No    |
| MNA-M     | Yes    | No     | Yes   | No    |
| MOA       | No     | Yes    | Yes   | Yes   |
| MPA/MPL   | No     | No     | No    | No    |
| NPA       | Yes    | No     | Yes   | No    |
| ORYSATA   | Yes    | No     | Yes   | No    |
| PA-IIL    | Yes    | No     | Yes   | Yes   |
| PA-IL     | No     | Yes    | Yes   | Yes   |
| PHA-E     | Yes    | No     | Yes   | No    |
| PHA-L     | Yes    | No     | No    | No    |
| PNA       | No     | Yes    | Yes   | Yes   |
| PSA       | Yes    | No     | No    | No    |
| PSL1A     | No     | No     | Yes   | Yes   |
| PTL-1     | No     | No     | Yes   | Yes   |
| PTL-2     | No     | No     | Yes   | Yes   |
| RCA120    | No     | No     | Yes   | Yes   |
| RPA       | Yes    | No     | No    | No    |
| RS-Fuc    | No     | No     | Yes   | Yes   |
| SBA       | No     | Yes    | Yes   | Yes   |
| SJA       | No     | No     | Yes   | Yes   |
| SNA-I     | No     | No     | Yes   | Yes   |
| SNA-II    | Yes    | No     | No    | Yes   |
| STL       | No     | No     | Yes   | Yes   |
| TL        | Yes    | No     | Yes   | No    |
| UDA       | Yes    | No     | Yes   | No    |
| UEA I     | No     | No     | Yes   | Yes   |
| UEA-II    | No     | Yes    | Yes   | Yes   |
| VFA       | Yes    | No     | No    | No    |
| VVL/VVA   | No     | Yes    | Yes   | No    |
| WFA       | No     | Yes    | Yes   | Yes   |
| WGA       | Yes    | Yes    | Yes   | Yes   |

(b)

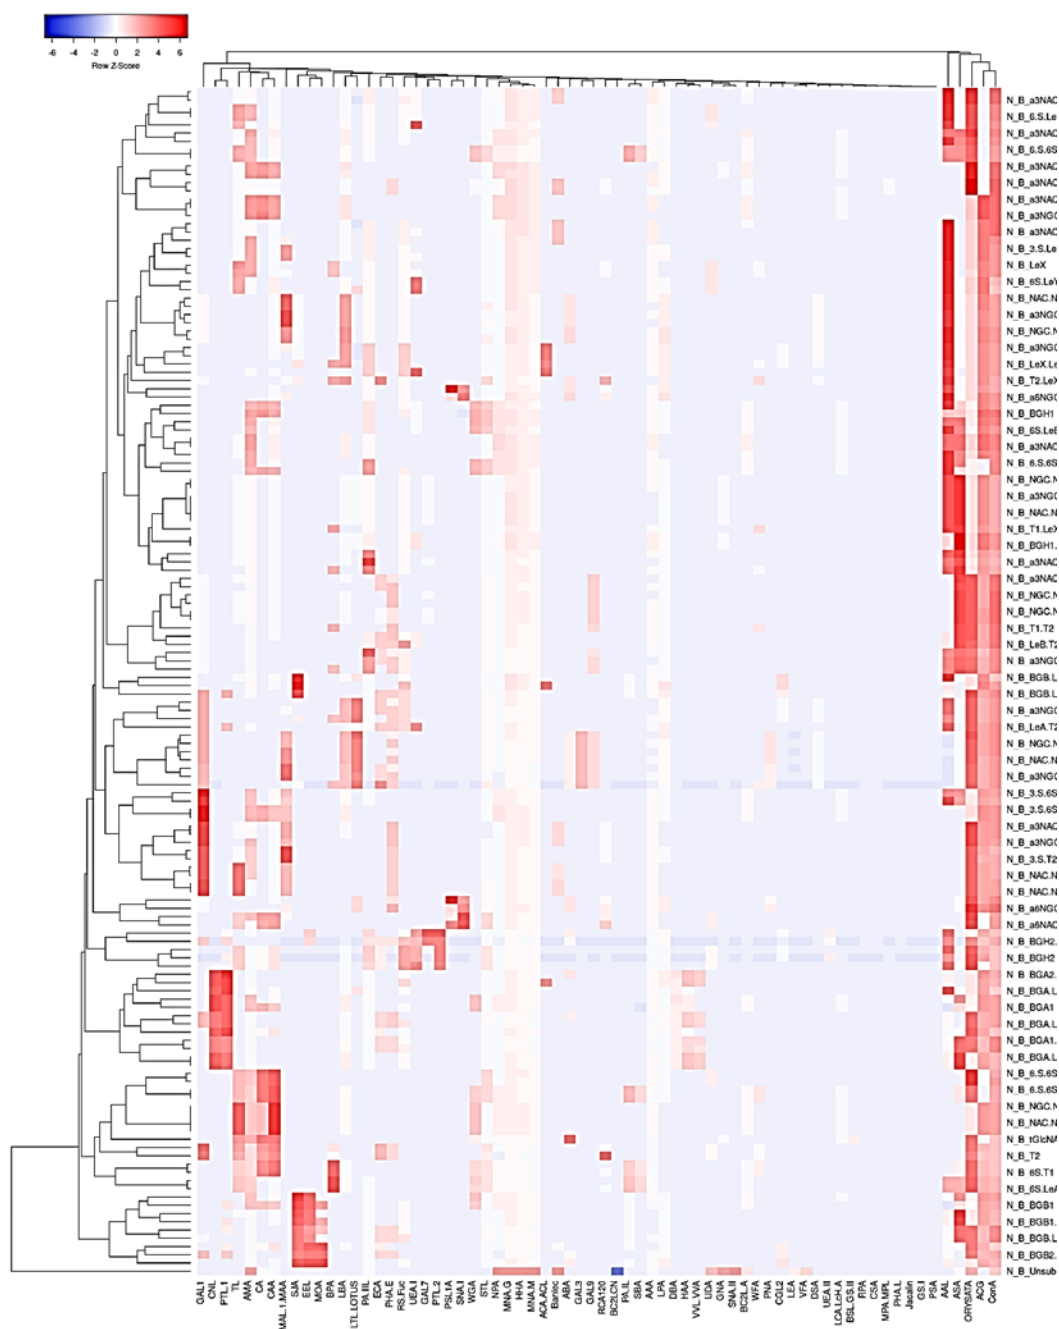

[illegible]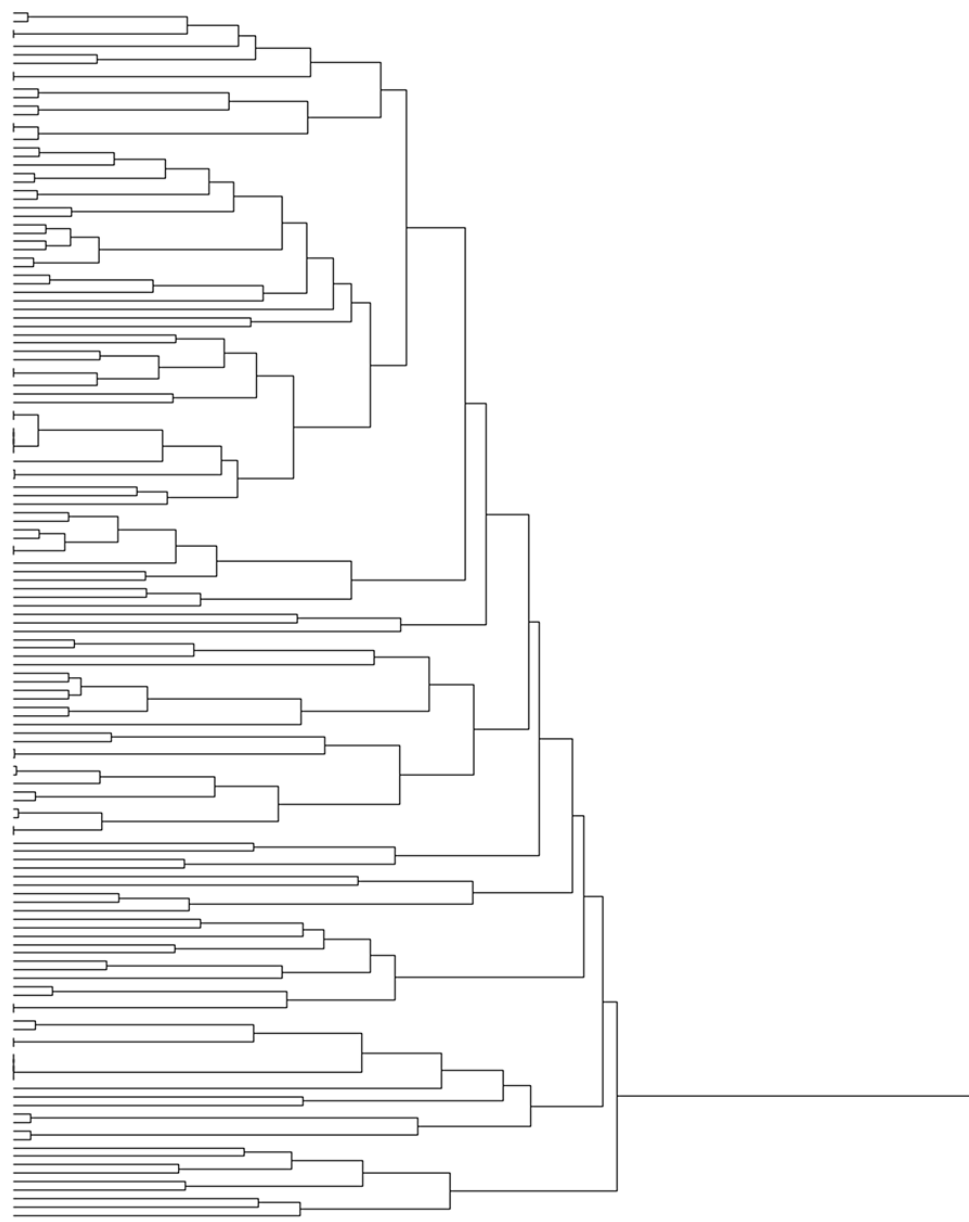

(c)

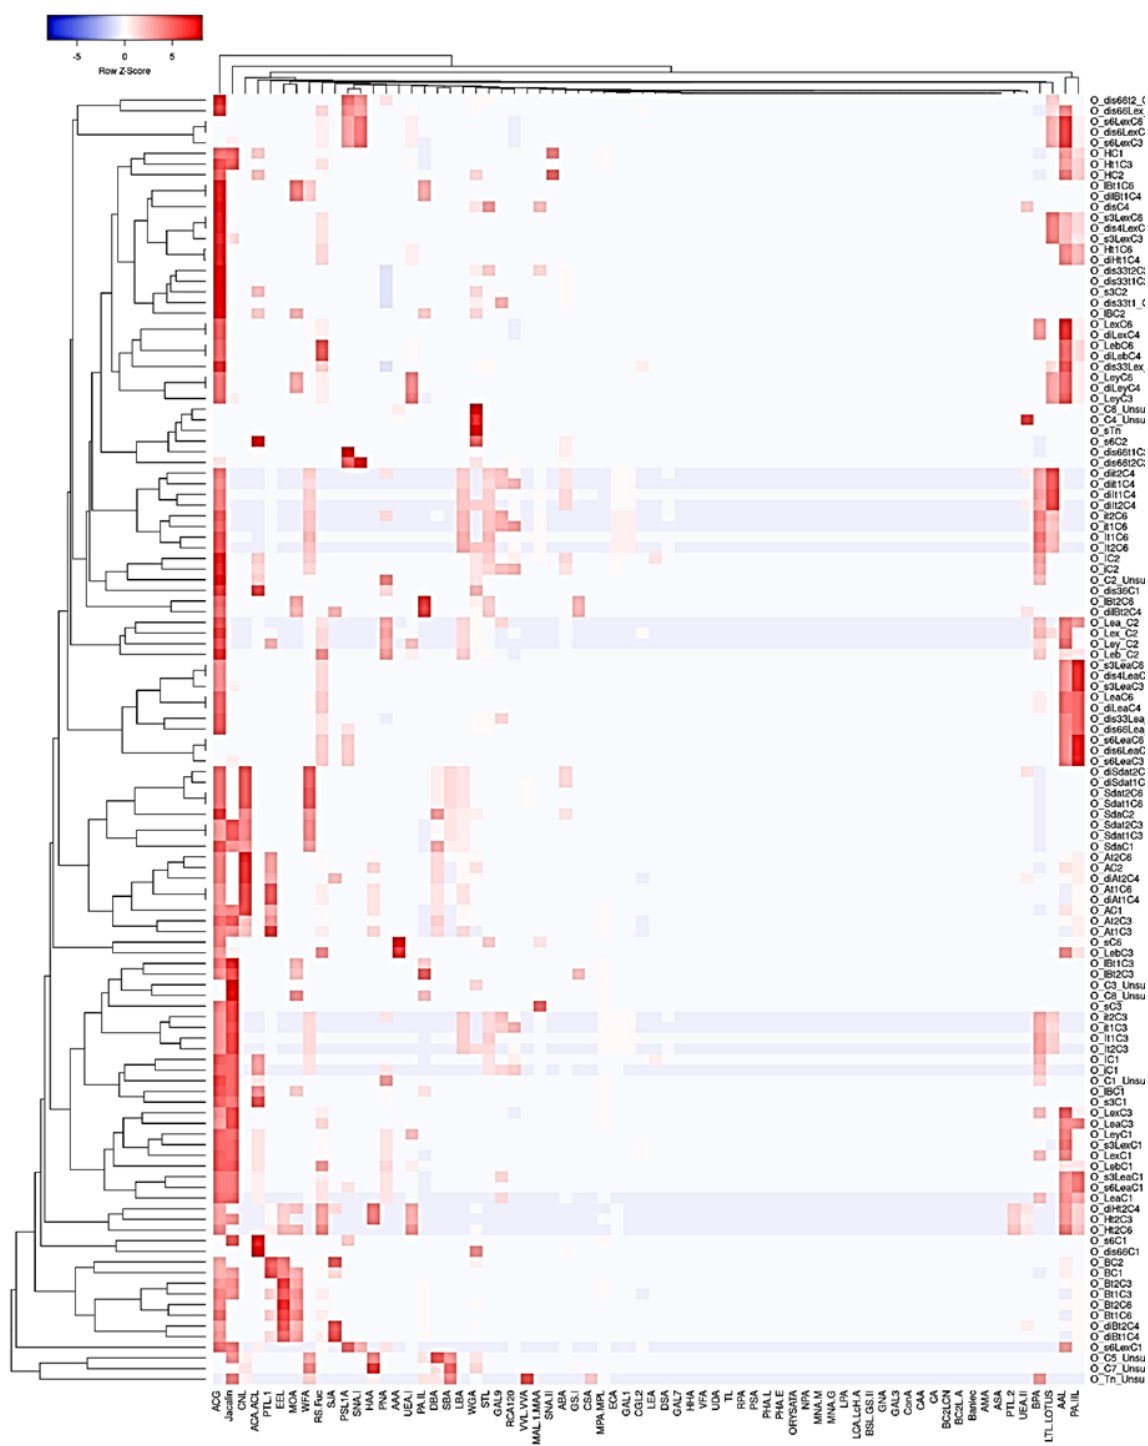

(c)

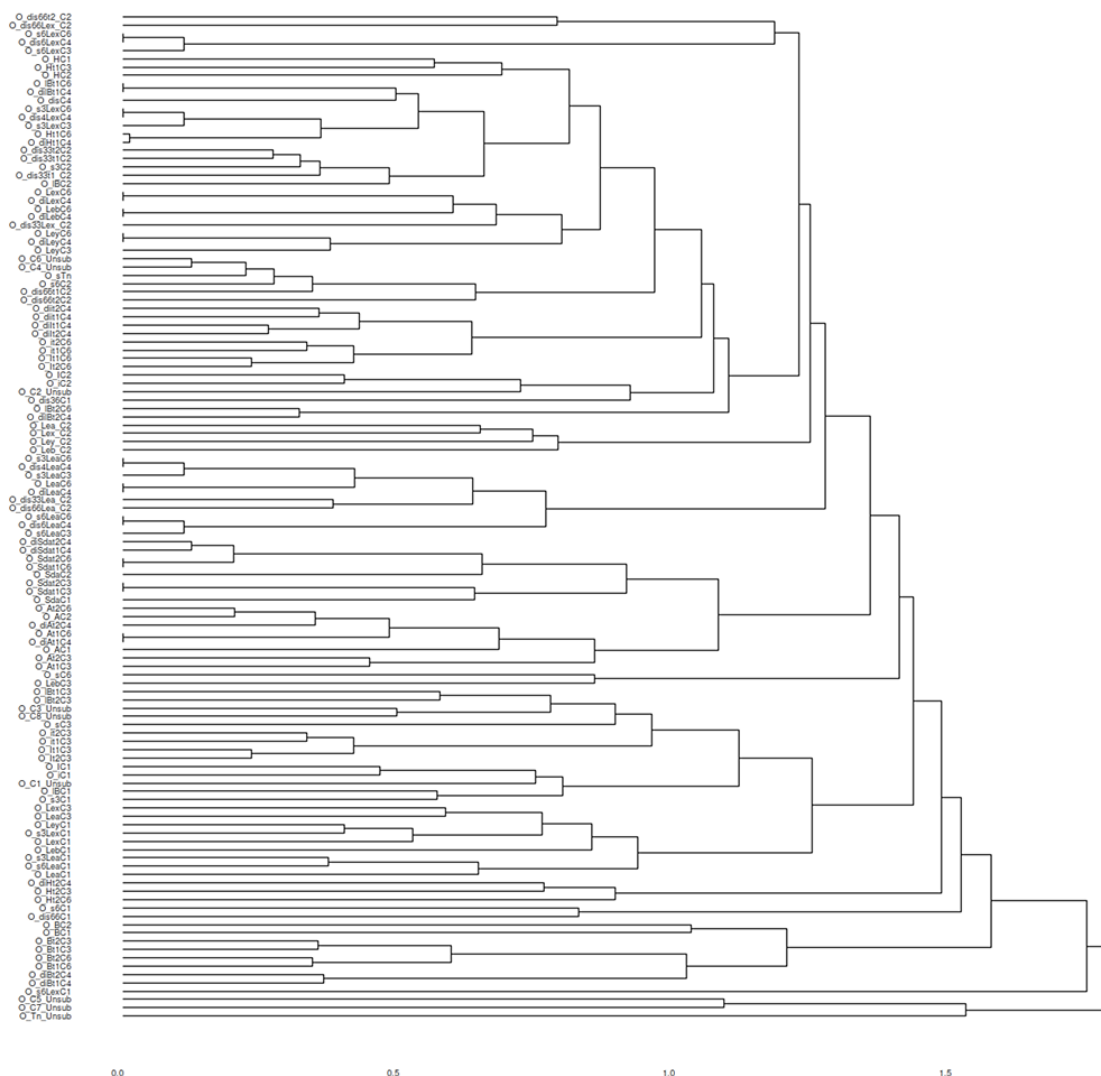

**Figure S2: Predicted binding of lectins to generated glycans: (a)** Table showing a list of lectins predicted to bind to core N-glycans, N-glycan extension sequences, O-core glycans, and O-glycan extension sequences **(b)** A heat map and a row dendrogram showing the predicted binding propensities of 68 lectins (portrayed on the columns) to different N-extension sequences (portrayed on the rows). **(c)** A heat map and a row dendrogram showing the predicted binding propensities of 68 lectins (portrayed on the columns) to different O-extension sequences (portrayed on the rows).

**Figure S3**

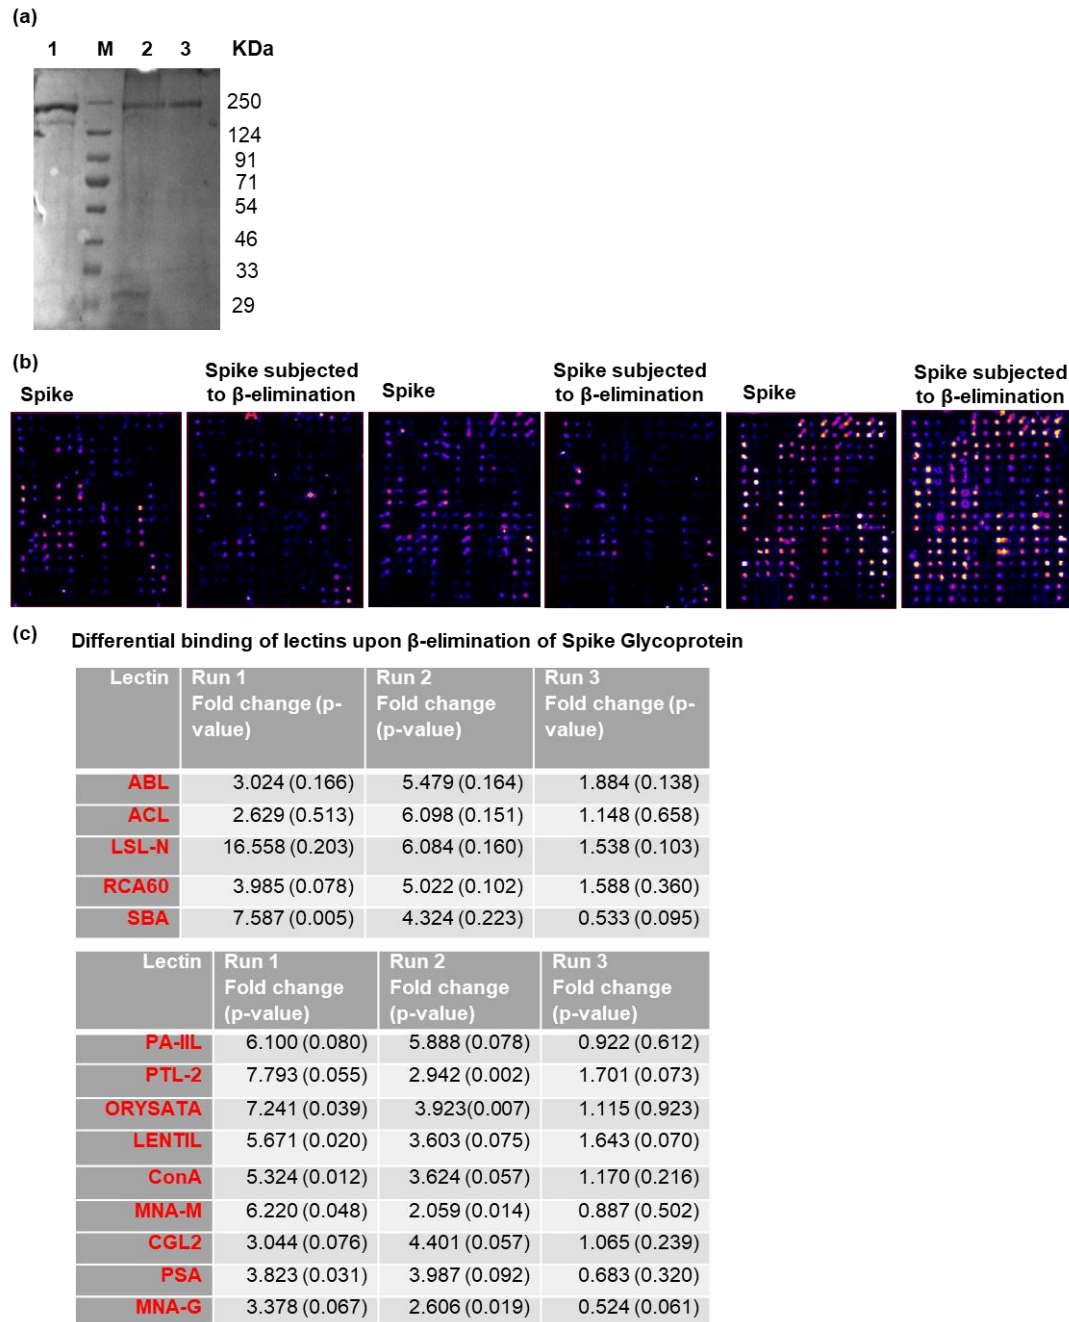

**Figure S3: Binding of lectins to Spike glycoprotein subjected to  $\beta$ -elimination.** (a) SDS-PAGE of Spike glycoprotein (~140 kDa) expressed and purified from HEK293F cell (lane 1) and purified Spike glycoprotein after  $\beta$ -elimination to remove O-glycans (lanes 2 & 3). (b) Pseudo-coloured images showing the binding of Spike glycoprotein with and without  $\beta$ -elimination (10  $\mu$ g). The images were generated using the Protein Array Analyzer macro plugin in Image J. (c) Fold change and p-values observed for O-glycan binding lectins (left table) and other lectins (right table) in a paired t-test (n=3).



Figure S4

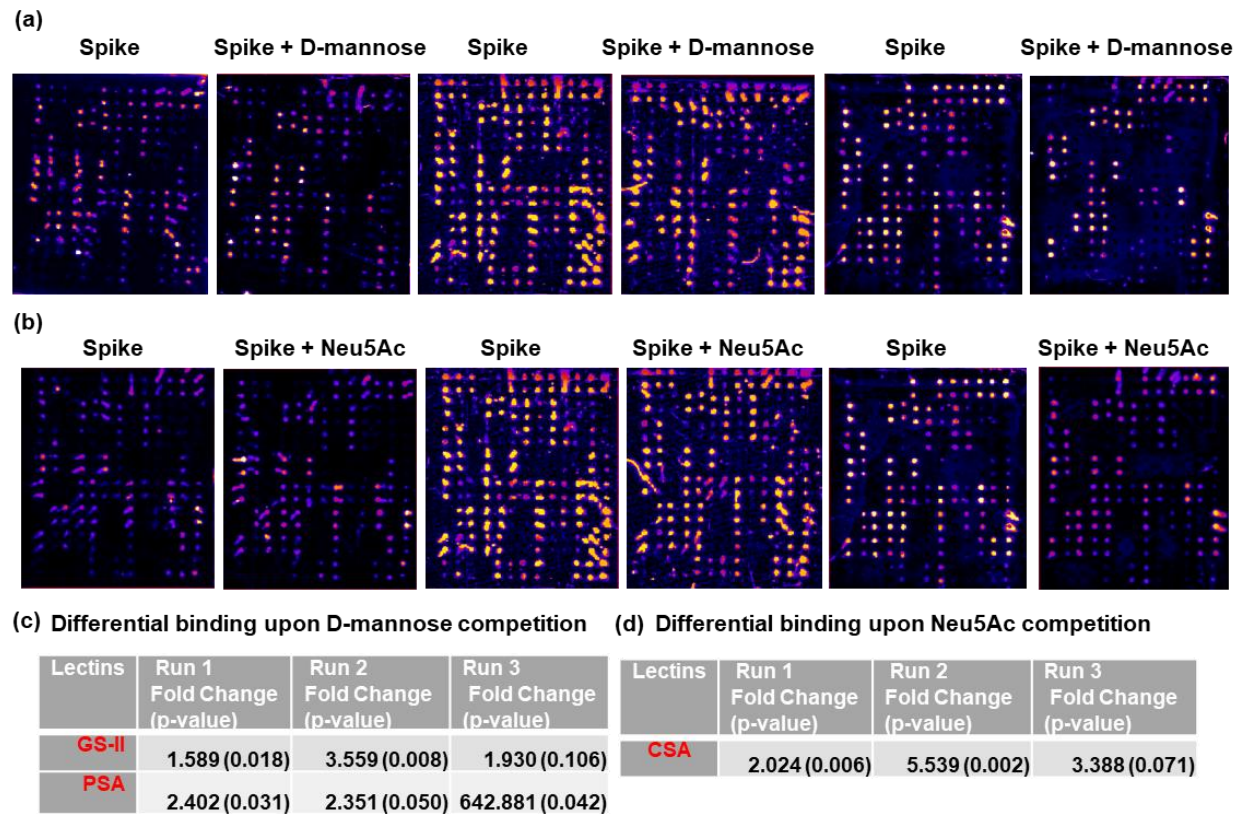

**Figure S4: Binding of lectins to Spike glycoprotein with D-mannose and Neu5Ac competition.** (a) Pseudo-coloured images showing the binding of Spike glycoprotein (10  $\mu$ g) in the presence or absence of 500 mM mannose. (b) Pseudo-coloured images showing the binding of Spike glycoprotein (10  $\mu$ g) in the presence or absence of 100 mM sialic acid. The images were generated using the Protein Array Analyzer macro plugin in Image J. (c) Fold change and p-values observed upon D-mannose competition in a paired t-test (n=3). (d) Fold change and p-values observed upon Neu5Ac competition in a paired t-test (n=3).
