# Supplementary material for: SENSING SWEET SPOTS: A comprehensive study of SARS-CoV-2-binding lectins
Source: Research Square preprint supplement (doi:10.21203/rs.3.rs-5022883/v1), 2024-09-09
Supplement: Supplementary file 1 [file SupplementaryData2_13Aug2024.xlsx]

## Sheet: Figure2
Glycan ID	Glycan Text/Lectin Model	AAA	AAL	ABA	ACG	ACA/ACL	AMA	ASA	Banlec	BC2L-A	BC2LCN	BPA	CA	CAA	CGL2	CNL	ConA	CSA	DBA	DSA	ECA	EEL	GAL1	GAL3	GAL7	GAL9	GNA	GS-I	BSL/GS-II	HAA	HHA	Jacalin	LBA	LCA/LcH A	LEA	LPA	LTL/LOTUS	MAL-1/MAA	MNA-G	MNA-M	MOA	MPA/MPL	NPA	ORYSATA	PA-IIL	PA-IL	PHA-E	PHA-L	PNA
N_Tetra_C6F_tGlcNAc	GlcNAcb1-6(GlcNAcb1-2)Mana1-6(GlcNAcb1-4(GlcNAcb1-2)Mana1-3)Manb1-4GlcNAcb1-4(Fuca1-6)GlcNAc?	0.0233187	0.90163	0	0	0	0.0104634	0	0	0.0117214	0.458918	0	0.120746	0.760942	0	0	0.0736988	0	0	0.460826	0	0	0	0.000998229	0	0	0.204236	0	0.462566	0	0.224981	-0.00133384	0	0	0	0	0	0	0	0	0	0.00329179	0	0.256884	0.0232168	0	0	0.303334	0
N_Tri1_C6F_tGlcNAc	GlcNAcb1-4(GlcNAcb1-2)Mana1-3(GlcNAcb1-2Mana1-6)Manb1-4GlcNAcb1-4(Fuca1-6)GlcNAc?	0.0233187	0.90163	0	0	0	0.176762	0	0	0.0117214	0.458918	0	0.120746	0.760942	0	0	0.154071	0	0	0.460826	0.00461231	0	0	0.000807984	0	0	0.204236	0	0.462566	0	0.127149	-0.00133384	0	0.00712688	0	0	0	0	0	0	0	0.00329179	0	0.256884	0.0232168	0	0	0	0
N_Tri1_Bi_C6F_tGlcNAc	GlcNAcb1-4(GlcNAcb1-2)Mana1-3(GlcNAcb1-2Mana1-6)(GlcNAcb1-4)Manb1-4GlcNAcb1-4(Fuca1-6)GlcNAc?	0.0233187	0.871718	0	0	0	0	0	0	0.0117214	0.458918	0	0.0850354	0	0	0	0.154071	0	0	0.460826	0	0	0	0	0	0	0	0	0.462566	0	0.127149	0	0	0.00712688	0	0	0	0	0	0	0	0	0	0	0.0232168	0	0.177925	0	0
N_Tetra_Bi_C6F_tGlcNAc	GlcNAcb1-6(GlcNAcb1-2)Mana1-6(GlcNAcb1-4(GlcNAcb1-2)Mana1-3)(GlcNAcb1-4)Manb1-4GlcNAcb1-4(Fuca1-6)GlcNAc?	0.0233187	0.871718	0	0	0	0	0	0	0.0117214	0.458918	0	0.0850354	0	0	0	0.0736988	0	0	0.460826	0	0	0	0	0	0	0	0	0.462566	0	0	0	0	0	0	0	0	0	0	0	0	0	0	0	0.0232168	0	0	0.303334	0
N_B_Bi_C6F_tGlcNAc	GlcNAcb1-2Mana1-6(GlcNAcb1-2Mana1-3)(GlcNAcb1-4)Manb1-4GlcNAcb1-4(Fuca1-6)GlcNAc?	0.0233187	0.871718	0.430322	0	0	0	0	0	0.0117214	0.458918	0	0.0850354	0.105815	0	0	0.356693	0	0	0	0	0	0	0	0	0	0	0	0.0948771	0	0.127149	0	0	0.00712688	0	0	0	0	0	0	0	0	0.124589	0	0.0232168	0	0.177925	0	0
N_Tri2_Bi_C6F_tGlcNAc	GlcNAcb1-6(GlcNAcb1-2)Mana1-6(GlcNAcb1-2Mana1-3)(GlcNAcb1-4)Manb1-4GlcNAcb1-4(Fuca1-6)GlcNAc?	0.0233187	0.871718	0.430322	0	0	0	0	0	0.0117214	0.458918	0	0.0850354	0	0	0	0.0926847	0	0	0	0	0	0	0	0	0	0	0	0.0948771	0	0.237223	0	1	0	0	0	0	0	0	0	0	0	0	0	0.0232168	0	0	0.303334	0
N_B_C6F_tGlcNAc	GlcNAcb1-2Mana1-6(GlcNAcb1-2Mana1-3)Manb1-4GlcNAcb1-4(Fuca1-6)GlcNAc?	0.0233187	0.726923	0.430322	0	0	0.176762	0	0	0.0117214	0.458918	0	1	1	0	0	0.498154	0	0	0	0.00461231	0	0	0.000807984	0	0	0.0594437	0	0.186348	0	0.127149	-0.00133384	0.019034	1	0	0	0	0	0	0	0	0.00329179	0.1682	0.256884	0.0232168	0	0	0	0
N_Tri2_C6F_tGlcNAc	GlcNAcb1-6(GlcNAcb1-2)Mana1-6(GlcNAcb1-2Mana1-3)Manb1-4GlcNAcb1-4(Fuca1-6)GlcNAc?	0.0233187	0.726923	0.430322	0	0	0.0104634	0	0	0.0117214	0.458918	0	0.120746	0.075183	0	0	0.32654	0	0	0	0.00461231	0	0	0.000998229	0	0	0.0594437	0	0.186348	0	0.237223	-0.00133384	1	1	0	0	0	0	0	0	0	0.00329179	0.1682	0.256884	0.0232168	0	0	0.303334	0
N_B_Bi_tGlcNAc	GlcNAcb1-2Mana1-6(GlcNAcb1-2Mana1-3)(GlcNAcb1-4)Manb1-4GlcNAcb1-4GlcNAc?	0.0233187	-0.00834872	0.430322	0	0	0	0	0	0.0117214	0	0.0108203	0.0850354	0.234772	0	0	0.356693	0	0	0	0	0	0	0	0	0	0	0	0.0948771	0	0.127149	0	0	0	0	0	0	0	0	0	0	0	0.124589	0	0	0	0.177925	0	0
N_Tri1_Bi_tGlcNAc	GlcNAcb1-4(GlcNAcb1-2)Mana1-3(GlcNAcb1-2Mana1-6)(GlcNAcb1-4)Manb1-4GlcNAcb1-4GlcNAc?	0.0233187	-0.00834872	0	0	0	0	0	0	0.0117214	0	0.0108203	0.0850354	0	0	0	0.154071	0	0	0.460826	0	0	0	0	0	0	0	0	0.462566	0	0.127149	0	0	0	0	0	0	0	0	0	0	0	0	0	0	0	0.177925	0	0
N_Tetra_Bi_tGlcNAc	GlcNAcb1-6(GlcNAcb1-2)Mana1-6(GlcNAcb1-4(GlcNAcb1-2)Mana1-3)(GlcNAcb1-4)Manb1-4GlcNAcb1-4GlcNAc?	0.0233187	-0.00834872	0	0	0	0	0	0	0.0117214	0	0.0108203	0.0850354	0	0	0	0.0372406	0	0	0.460826	0	0	0	0	0	0	0	0	0.462566	0	0	0	0	0	0	0	0	0	0	0	0	0	0	0	0	0	0	0.303334	0
N_Tri2_tGlcNAc	GlcNAcb1-6(GlcNAcb1-2)Mana1-6(GlcNAcb1-2Mana1-3)Manb1-4GlcNAcb1-4GlcNAc?	0.0233187	-0.00834872	0.430322	0	0	0.659843	0	0	0.0117214	0	0	0.128588	0.075183	0	0	0.32654	0	0	0	0.00173771	0	0	0.000998229	0	0	0.0594437	0	0.186348	0	0.771715	0	1	0.0440631	0	0	0	0	0.156344	0.106751	0	0.00329179	0.1682	0.763584	0	0	0	0.303334	0
N_Tetra_tGlcNAc	GlcNAcb1-6(GlcNAcb1-2)Mana1-6(GlcNAcb1-4(GlcNAcb1-2)Mana1-3)Manb1-4GlcNAcb1-4GlcNAc?	0.0233187	-0.00834872	0	0	0	1	0	0	0.0117214	0	0	0.514434	0.760942	0	0	0.0736988	0	0	0.460826	0	0	0	0.000998229	0	0	0.204236	0	0.462566	0	0.224981	0	0	0	0	0	0	0	0.156344	0.106751	0	0.00329179	0	0	0	0	0	0.303334	0
N_Tri2_Bi_tGlcNAc	GlcNAcb1-6(GlcNAcb1-2)Mana1-6(GlcNAcb1-2Mana1-3)(GlcNAcb1-4)Manb1-4GlcNAcb1-4GlcNAc?	0.0233187	-0.00834872	0.430322	0	0	0	0	0	0.0117214	0	0.0108203	0.0850354	0	0	0	0.0926847	0	0	0	0	0	0	0	0	0	0	0	0.0948771	0	0.237223	0	1	0	0	0	0	0	0	0	0	0	0	0	0	0	0	0.303334	0
N_Hybrid_5Man_Unsub	Mana1-6(Mana1-3)Mana1-6(Mana1-3)Manb1-4GlcNAcb1-4GlcNAc?	0.0233187	-0.00834872	0	0	0	1	0.184824	1	1	-1	0	0	0	0	0	0.443061	0	0	0	0.00461231	0	0	0.000998229	0	0	0.997456	0	0	0	1	0	0	0.0192024	0.320423	0	0.374248	0	1	1	0	0.00329179	0.472749	0.763584	0.167511	0	0	0	0
N_Hybrid_6Man_Unsub	Mana1-6(Mana1-3)Mana1-6(Mana1-2Mana1-3)Manb1-4GlcNAcb1-4GlcNAc?	0.0233187	-0.00834872	0	0	0	1	0.184824	1	1	-1	0	0	0	0	0	0.443061	0	0	0	0.00461231	0	0	0.000998229	0	0	0.61717	0	0	0	0.823629	0	0.224571	0.0796479	0.0507831	0	0.374248	0	1	1	0	0.00329179	0.472749	0.763584	0.167511	0	0	0	0
N_Hybrid_5Man_tGlcNAc	Mana1-6(Mana1-3)Mana1-6(GlcNAcb1-2Mana1-3)Manb1-4GlcNAcb1-4GlcNAc?	0.0233187	-0.00834872	0.430322	0	0	1	0.184824	1	1	-1	0	0	1	0	0	0.443061	0	0	0	0.00173771	0	0	0.000998229	0	0	0.61717	0	0.186348	0	0.823629	0	0.019034	0.0440631	0.320423	0	0.374248	0	1	1	0	0.00329179	0.472749	0.763584	0.167511	0	0	0	0
N_Hybrid_3Man_tGlcNAc	Mana1-6(GlcNAcb1-2Mana1-3)Manb1-4GlcNAcb1-4GlcNAc?	0.0233187	-0.00834872	1	0	0	1	0.184824	0.200955	0.433159	0.099536	0	1	1	0	0	0.574355	0	0	0	-0.00155605	0	0	0	0	0	0.628682	0	0.186348	0	0.523246	0	0	0.0440631	0.320423	0	0	0	1	1	0	0.00329179	0.1682	0.763584	0	0	0	0	0
N_Hybrid_7Man_Unsub	Mana1-2Mana1-6(Mana1-3)Mana1-6(Mana1-2Mana1-3)Manb1-4GlcNAcb1-4GlcNAc?	0.0233187	-0.00834872	0	0	0	1	0.184824	1	1	-1	0	0	0	0	0	0.586253	0	0	0	0.00461231	0	0	0	0	0	0.628682	0	0	0	0.393869	0	0.224571	0.228483	0.0507831	0	0	0	0.156344	0.106751	0	0.00329179	0.1682	0.763584	0.167511	0	0	0	0
N_Hybrid_8Man_Unsub	Mana1-2Mana1-6(Mana1-3)Mana1-6(Mana1-2Mana1-2Mana1-3)Manb1-4GlcNAcb1-4GlcNAc?	0.0233187	-0.00834872	0	0	0	1	0.184824	1	1	-1	0	0	0	0	0	0.586253	0	0	0	0.00461231	0	0	0	0	0	0.628682	0	0	0	0.393869	0	0.224571	0.228483	0.0507831	0	0	0	0	0	0	0.00329179	0.1682	0.763584	0.167511	0	0	0	0
N_Hybrid_9Man_Unsub	Mana1-2Mana1-6(Mana1-2Mana1-3)Mana1-6(Mana1-2Mana1-2Mana1-3)Manb1-4GlcNAcb1-4GlcNAc?	0.0233187	-0.00834872	0	0	0	1	0.184824	1	0.433159	-1	0	0	0	0	0	0.586253	0	0	0	0.00461231	0	0	0	0	0	0.628682	0	0	0	0.393869	0	0.224571	0.228483	0.0507831	0	0	0	0	0	0	0.00329179	0.1682	0.763584	0.167511	0	0	0	0
N_Hybrid_4Man_tGlcNAc	Mana1-6Mana1-6(GlcNAcb1-2Mana1-3)Manb1-4GlcNAcb1-4GlcNAc?	0.0233187	-0.00834872	0.430322	0	0	1	0.184824	0	1	0.34054	0	0.120746	1	0	0	1	0	0	0	0.00173771	0	0	0	0	0	0.628682	0	0.186348	0	0.322542	0	0	0.228483	0.0507831	0	0	0	1	1	0	0.00329179	0.1682	0.763584	0	0	0	0	0
N_Tri1_tGlcNAc	GlcNAcb1-4(GlcNAcb1-2)Mana1-3(GlcNAcb1-2Mana1-6)Manb1-4GlcNAcb1-4GlcNAc?	0.0233187	-0.00834872	0	0	0	1	0	0	0.0117214	0	0	0.514434	0.760942	0	0	0.154071	0	0	0.460826	0.00461231	0	0	0	0	0	0.204236	0	0.462566	0	0.127149	0	0	0	0	0	0	0	0.156344	0.106751	0	0.00329179	0	0	0	0	0	0	0
N_B_tGlcNAc	GlcNAcb1-2Mana1-6(GlcNAcb1-2Mana1-3)Manb1-4GlcNAcb1-4GlcNAc?	0.0233187	-0.00834872	1	0	0	0.659843	0	0	0.0117214	0	0	1	1	0	0	0.498154	0	0	0	-0.00155605	0	0	0	0	0	0.0594437	0	0.186348	0	0.127149	0	0.019034	0.0440631	0	0	0	0	0.156344	0.106751	0	0.00329179	0.1682	1	0	0	0	0	0
Effect of bisecting GlcNAc and core fucosylation		AAA	AAL	ABA	ACG	ACA/ACL	AMA	ASA	Banlec	BC2L-A	BC2LCN	BPA	CA	CAA	CGL2	CNL	ConA	CSA	DBA	DSA	ECA	EEL	GAL1	GAL3	GAL7	GAL9	GNA	GS-I	BSL/GS-II	HAA	HHA	Jacalin	LBA	LCA/LcH A	LEA	LPA	LTL/LOTUS	MAL-1/MAA	MNA-G	MNA-M	MOA	MPA/MPL	NPA	ORYSATA	PA-IIL	PA-IL	PHA-E	PHA-L	PNA
N_B_Bi_tGlcNAc vs N_B_tGlcNAc	Effect of bisecting GlcNAc	0	0	-0.430322	0	0	1	0	0	0	0	-0.0108203	0.429399	0.52617	0	0	-0.282994	0	0	0.460826	0	0	0	0.000998229	0	0	0.204236	0	0.367689	0	0.0978321	0	0	0	0	0	0	0	0.156344	0.106751	0	0.00329179	-0.124589	0	0	0	-0.177925	0.303334	0
N_Tri1_Bi_tGlcNAc	Effect of bisecting GlcNAc	0	0	0.430322	0	0	0	0	0	0	0	0	0	0	0	0	-0.0613863	0	0	-0.460826	0	0	0	0	0	0	0	0	-0.367689	0	0.110074	0	1	0	0	0	0	0	0	0	0	0	0	0	0	0	-0.177925	0.303334	0
N_Tri2_Bi_tGlcNAc	Effect of bisecting GlcNAc	0	0	0	0	0	1	0.184824	1	0.988279	-1	-0.0108203	-0.0850354	0	0	0	0.405821	0	0	-0.460826	0.00461231	0	0	0.000998229	0	0	0.997456	0	-0.462566	0	1	0	0	0.0192024	0.320423	0	0.374248	0	1	1	0	0.00329179	0.472749	0.763584	0.167511	0	0	-0.303334	0
N_Tetra_Bi_tGlcNAc	Effect of bisecting GlcNAc	0	0	-0.430322	0	0	0.340157	0.184824	1	0.988279	-1	0	-0.128588	-0.075183	0	0	0.116521	0	0	0	0.00287461	0	0	0	0	0	0.557726	0	-0.186348	0	0.0519142	0	-0.775429	0.0355847	0.0507831	0	0.374248	0	0.843656	0.893249	0	0	0.304549	0	0.167511	0	0	-0.303334	0
N_B_C6F_tGlcNAc vs N_B_tGlcNAc	Effect of core fucose	0	0	0	0	0	1	0.184824	1	0.988279	-1	-0.0108203	-0.0850354	0.765228	0	0	0.0863681	0	0	0	0.00173771	0	0	0.000998229	0	0	0.61717	0	0.0914708	0	0.69648	0	0.019034	0.0440631	0.320423	0	0.374248	0	1	1	0	0.00329179	0.348159	0.763584	0.167511	0	-0.177925	0	0
N_B_Bi_C6F_tGlcNAc	Effect of core fucose	0	0	1	0	0	1	0.184824	0.200955	0.421438	0.099536	-0.0108203	0.914965	1	0	0	0.420284	0	0	-0.460826	-0.00155605	0	0	0	0	0	0.628682	0	-0.276218	0	0.396097	0	0	0.0440631	0.320423	0	0	0	1	1	0	0.00329179	0.1682	0.763584	0	0	-0.177925	0	0
N_Tri1_C6F_tGlcNAc	Effect of core fucose	0	0	0	0	0	1	0.184824	1	0.988279	-1	-0.0108203	-0.0850354	0	0	0	0.549012	0	0	-0.460826	0.00461231	0	0	0	0	0	0.628682	0	-0.462566	0	0.393869	0	0.224571	0.228483	0.0507831	0	0	0	0.156344	0.106751	0	0.00329179	0.1682	0.763584	0.167511	0	0	-0.303334	0
N_Tri2_C6F_tGlcNAc	Effect of core fucose	0	0	-0.430322	0	0	0.340157	0.184824	1	0.988279	-1	0	-0.128588	-0.075183	0	0	0.259713	0	0	0	0.00287461	0	0	-0.000998229	0	0	0.569239	0	-0.186348	0	-0.377846	0	-0.775429	0.18442	0.0507831	0	0	0	-0.156344	-0.106751	0	0	0	0	0.167511	0	0	-0.303334	0
N_Tri1_Bi_C6F_tGlcNAc	Effect of core fucose	0	0	0	0	0	0	0.184824	1	0.421438	-1	0	-0.514434	-0.760942	0	0	0.512554	0	0	-0.460826	0.00461231	0	0	-0.000998229	0	0	0.424446	0	-0.462566	0	0.168888	0	0.224571	0.228483	0.0507831	0	0	0	-0.156344	-0.106751	0	0	0.1682	0.763584	0.167511	0	0	-0.303334	0
N_Tri2_Bi_C6F_tGlcNAc	Effect of core fucose	0	0	0	0	0	1	0.184824	0	0.988279	0.34054	-0.0108203	0.035711	1	0	0	0.907315	0	0	0	0.00173771	0	0	0	0	0	0.628682	0	0.0914708	0	0.0853189	0	-1	0.228483	0.0507831	0	0	0	1	1	0	0.00329179	0.1682	0.763584	0	0	0	-0.303334	0
N_Tetra_C6F_tGlcNAc	Effect of core fucose	0	0	0	0	0	0	-0.184824	-1	-0.988279	1	0	0.514434	0.760942	0	0	-0.28899	0	0	0.460826	0	0	0	-0.000998229	0	0	-0.79322	0	0.462566	0	-0.872851	0	0	-0.0192024	-0.320423	0	-0.374248	0	-0.843656	-0.893249	0	0	-0.472749	-0.763584	-0.167511	0	0	0	0
N_Tetra_Bi_C6F_tGlcNAc	Effect of core fucose	0	0	1	0	0	-0.340157	-0.184824	-1	-0.988279	1	0	1	1	0	0	0.0550924	0	0	0	-0.00616836	0	0	-0.000998229	0	0	-0.557726	0	0.186348	0	-0.69648	0	-0.205537	-0.0355847	-0.0507831	0	-0.374248	0	-0.843656	-0.893249	0	0	-0.304549	0.236416	-0.167511	0	0	0	0
	AAL	ABA	AMA	ASA	Banlec	BC2L-A	BC2LCN	CA	CAA	ConA	DSA	GNA	BSL/GS-II	HHA	LBA	LCA	LEA	LTL	MNA-G	MNA-M	NPA	ORYSATA	PA-IIL	PHA-E	PHA-L	PSA	RPA	SNA-II	TL	UDA	VFA	WGA
Man3-5 tGlcNAc	No	yes	yes	yes	yes*	yes	yes*	yes*	yes	yes	No	yes	yes	yes	No	yes*	yes*	yes*	yes	yes	yes	yes	yes*	No	No	No	No	yes	No	yes	yes*	Yes
Man5-6 Unsub	No	No	yes	yes	yes	yes	No	No	No	yes	No	yes	no	yes	yes*	no	yes*	yes	yes	yes	yes	yes	yes	No	No	No	No	yes	No	yes	yes	No
Man 7-9 Unsub	No	No	yes	yes	yes	yes	No	No	No	yes	No	yes	no	yes	yes	yes	No	No	yes*	yes*	yes	yes	yes	No	No	No	No	yes	No	yes	yes	No
N_B_tGlcNAc	No	yes	yes	No	No	No	No	yes	yes	yes	No	No	yes	yes	No	No	No	No	yes	yes	yes	yes	No	No	No	No	No	No	yes	No	No	yes
N_Tri_tGlcNAc	No	yes*	yes	No	No	No	No	yes	yes*	yes	yes*	yes*	yes	yes	yes*	No	No	No	yes	yes	yes*	yes*	No	No	yes*	No	yes*	No	yes*	No	No	yes
N_Tetra_tGlcNAc	No	No	yes	No	No	No	No	yes	yes	No	yes	yes	yes	yes	No	No	No	No	yes	yes	No	No	No	No	yes	No	yes	No	No	No	No	yes
Bisecting	Unchanged	Hindered/Unchanged	Hindered	Unchanged	Unchanged	Unchanged	Unchanged	Hindered	Hindered	Hindered/Unchanged	Unchanged	Hindered	Hindered/Unchanged	Hindered/Unchanged	Hindered/Unchanged	Hindered/Unchanged	Unchanged	Unchanged	Hindered	Hindered	Hindered/Unchanged	Hindered/Unchanged	Unchanged	Enhanced/Unchanged	Unchanged	Unchanged	Enhanced/Hindered/Unchanged	Unchanged	Hindered/Unchanged	Unchanged	Unchanged	Unchanged
Core fucose	Enhanced	Hindered/Unchanged	Hindered/Unchanged	Unchanged	Unchanged	Unchanged	Enhanced	Hindered/Unchanged	Hindered/Unchanged	Enhanced/Unchanged	Unchanged	Unchanged	Unchanged	Hindered/Unchanged	Unchanged	Enhanced/Unchanged	Unchanged	Unchanged	Hindered/unchanged	Hindered/unchanged	Unchanged	Enhanced/Hindered/Unchanged	Enhanced	Unchanged	Unchanged	Enhanced/Hindered/Unchanged	Unchanged	Unchanged	Hindered/Unchanged	Unchanged	Enhanced/Unchanged	Unchanged
	ASA	Banlec	BC2L-A	UDA	VFA	SNA-II	PA-IIL	LEA	LTL	LcHA	BC2LCN	ConA	GNA	NPA	ORYSATA	AMA	HHA	MNA-G	MNA-M	LBA	CA	CAA	ABA	GS-II	WGA	PHA-L	DSA	RPA	TL	PHA-E	AAL	PSA
Man3-5 tGlcNAc	yes	yes*	yes	yes	yes*	yes	yes*	yes*	yes*	yes*	yes*	yes	yes	yes	yes	yes	yes	yes	yes	No	yes*	yes	yes	yes	Yes	No	No	No	No	No	No	No
Man5-6 Unsub	yes	yes	yes	yes	yes	yes	yes	yes*	yes	no	No	yes	yes	yes	yes	yes	yes	yes	yes	yes*	No	No	No	no	No	No	No	No	No	No	No	No
Man 7-9 Unsub	yes	yes	yes	yes	yes	yes	yes	No	No	yes	No	yes	yes	yes	yes	yes	yes	yes*	yes*	yes	No	No	No	no	No	No	No	No	No	No	No	No
N_B_tGlcNAc	No	No	No	No	No	No	No	No	No	No	No	yes	No	yes	yes	yes	yes	yes	yes	No	yes	yes	yes	yes	yes	No	No	No	yes	No	No	No
N_Tri_tGlcNAc	No	No	No	No	No	No	No	No	No	No	No	yes	yes*	yes*	yes*	yes	yes	yes	yes	yes*	yes	yes*	yes*	yes	yes	yes*	yes*	yes*	yes*	No	No	No
N_Tetra_tGlcNAc	No	No	No	No	No	No	No	No	No	No	No	No	yes	No	No	yes	yes	yes	yes	No	yes	yes	No	yes	yes	yes	yes	yes	No	No	No	No
Bisecting	NC	NC	NC	NC	NC	NC	NC	NC	NC	Lo/NC	NC	Lo/NC	Lo	Lo/NC	Lo/NC	Lo	Lo/NC	Lo	Lo	Lo/NC	Lo	Lo	Lo/NC	Lo/NC	NC	NC	NC	Hi/Lo/NC	Lo/NC	Hi/NC	NC	NC
Core fucose	NC	NC	NC	NC	NC	NC	NC	NC	NC	Hi	Hi	NC	NC	NC	Hi/Lo/NC	Lo/NC	Lo/NC	Lo/NC	Lo/NC	NC	Lo/NC	Lo/NC	Lo/NC	NC	NC	NC	NC	NC	Lo/NC	NC	Hi	Hi/Lo/NC
[truncated: 20 more columns]

## Sheet: Figure3
Glycan ID	Glycan Text/Lectin Model	AAA	AAL	ABA	ACG	ACL/ACA	AMA	ASA	Banlec	BC2L-A	BC2LCN	BPA	CA	CAA	CGL2	CNL	ConA	CSA	DBA	DSA	ECA	EEL	GAL1	GAL3	GAL7	GAL9	GNA	GS-I	BSL/GS-II	HAA	HHA	Jacalin	LBA	LCA/LcH A	LEA	LTL	LPA	MAL-1/MAA	MNA-G	MNA-M	MOA	MPA/MPL	NPA	ORYSATA	PA-IIL	PA-IL	PHA-E	PHA-L	PNA
O_C1_Unsub	Galb1-3GalNAc?	0	0	0.021091	1	0.196762	0	0	0	0	0	0.263216	0	0	0	0	0	0	0	0	0	0	0	0	0	0	0	0	0	0	-1.08751e-05	0.864539	0	0	0	0	0	0	0	0	0	0.0462515	0	0	0	-0.00639867	0	0	0.496373
O_C2_Unsub	Galb1-3(GlcNAcb1-6)GalNAc?	0.253974	0	0.021091	1	0.236568	0	0	0	0	0	0.263216	0	0	0	0	0	0	0	0	0	0	0	0	0	0	0	0	0	0	0	0	0	0	0	0	0	0	0	0	0	0	0	0	0	0	0	0	0.500819
O_C3_Unsub	GlcNAcb1-3GalNAc?	0.253974	0	0	0	0	0	0	0	0	0	0	0	0	0	0	0	0	0	0	0	0	0	0	0	0	0	0	0	0	-1.08751e-05	1	0	0	0	0	0	0	0	0	0	0.0442844	0	0	0	-0.00625361	0	0	0
O_C4_Unsub	GlcNAcb1-3(GlcNAcb1-6)GalNAc?	0.253974	0	0	0	0	0	0	0	0	0	0	0	0	0	0	0	0	0	0	0	0	0	0	0	0	0	0	0	0	0	0	0	0	0	0	0	0	0	0	0	0	0	0	0	0	0	0	0
O_C5_Unsub	GalNAca1-3GalNAc?	0	0	0	0	0	0	0	0	0	0	0	0	0	0	0.157712	0	-0.000507351	1	0	0	0	0	0	0	0	0	0.0438802	0	0.757339	-1.08751e-05	0.694752	0	0	0	0	0	0	0	0	0	0.0442844	0	0	0	0.190792	0	0	0
O_C6_Unsub	GlcNAcb1-6GalNAc?	0.253974	0	0	0	0	0	0	0	0	0	0	0	0	0	0	0	0	0	0	0	0	0	0	0	0	0	0	0	0	0	0	0	0	0	0	0	0	0	0	0	0	0	0	0	0	0	0	0
O_C7_Unsub	GalNAca1-6GalNAc?	0	0	0	0	0	0	0	0	0	0	0	0	0	0	0.157712	0	-0.000507351	0.184081	0	0	0	0	0	0	0	0	0.0438802	0	0.757339	0	0	0	0	0	0	0	0	0	0	0	0	0	0	0	0	0	0	0
O_C8_Unsub	Gala1-3GalNAc?	0	0	0	0	0	0	0	0	0	0	0	0	0	0	0	0	0	0	0	0	0	0	0	0	0	0	0	0	0	-1.08751e-05	0.694752	0	0	0	0	0	0	0	0	0.297271	0.0442844	0	0	0	0.190792	0	0	0
O_sTn_Unsub	Neu5Aca2-6GalNAc?	0	0	0	0	0	0	0	0	0	0	0	0	0	0	0	0	0	0	0	0	0	0	0	0	0	0	0	0	0	0	0	0	0	0	0	0	0	0	0	0	0	0	0	0	0	0	0	0
O_Tn_Unsub	GalNAc?	0	0	0	0	0	0	0	0	0	0	0.581537	0	0	0	0.157712	0	0.335328	0.184081	0	0	0	0	0	0	0	0	-0.0252684	0	0.143257	-1.08751e-05	0.694752	0	0	0	0	0	0	0	0	0	0.0442844	0	0	0	0.190792	0	0	0
Glycan ID	Glycan Text/Lectin Model	AAA	ACG	ACL/ACA	BPA	CNL	CSA	DBA	HAA	Jacalin	MOA	PA-IL	PNA	SBA	UEA-II	VVL/VVA	WFA	WGA
O_Tn_Unsub	GalNAc?	0	0	0	0.581537	0.157712	0.335328	0.184081	0.143257	0.694752	0	0.190792	0	0.649529	0	0.931783	0.323374	0.0124892
O_sTn_Unsub	Neu5Aca2-6GalNAc?	0	0	0	0	0	0	0	0	0	0	0	0	0	0	0	0	0.365033
O_C1_Unsub	Galb1-3GalNAc?	0	1	0.196762	0.263216	0	0	0	0	0.864539	0	-0.00639867	0.496373	0	0	0	0.0352181	0
O_C2_Unsub	Galb1-3(GlcNAcb1-6)GalNAc?	0.253974	1	0.236568	0.263216	0	0	0	0	0	0	0	0.500819	0	0	0	0.0352181	0.161031
O_C3_Unsub	GlcNAcb1-3GalNAc?	0.253974	0	0	0	0	0	0	0	1	0	-0.00625361	0	0	0	0	0	0.161031
O_C4_Unsub	GlcNAcb1-3(GlcNAcb1-6)GalNAc?	0.253974	0	0	0	0	0	0	0	0	0	0	0	0	0.123932	0	0	0.161031
O_C5_Unsub	GalNAca1-3GalNAc?	0	0	0	0	0.157712	-0.000507351	1	0.757339	0.694752	0	0.190792	0	0.649529	0	0.0156658	0.512242	0.193612
O_C6_Unsub	GlcNAcb1-6GalNAc?	0.253974	0	0	0	0	0	0	0	0	0	0	0	0	0	0	0	0.161031
O_C7_Unsub	GalNAca1-6GalNAc?	0	0	0	0	0.157712	-0.000507351	0.184081	0.757339	0	0	0	0	0.649529	0	0.0156658	0.512242	0.193612
O_C8_Unsub	Gala1-3GalNAc?	0	0	0	0	0	0	0	0	0.694752	0.297271	0.190792	0	0	0	0	0	0
	WGA	Jacalin	AAA	BPA	CNL	DBA	HAA	SBA	WFA	PA-IL	ACG	ACL/ACA	PNA	CSA	VVL/VVA	UEA-II	MOA
O_Tn_Unsub	no	yes	no	yes	yes	yes	yes	yes	yes	yes	no	no	no	yes	yes	no	no
O_sTn_Unsub	yes	no	no	no	no	no	no	no	no	no	no	no	no	no	no	no	no
O_C1_Unsub	no	yes	no	yes	no	no	no	no	no	no	yes	yes	yes	no	no	no	no
O_C2_Unsub	yes	no	yes	yes	no	no	no	no	no	no	yes	yes	yes	no	no	no	no
O_C3_Unsub	yes	yes	yes	no	no	no	no	no	no	no	no	no	no	no	no	no	no
O_C4_Unsub	yes	no	yes	no	no	no	no	no	no	no	no	no	no	no	no	yes	no
O_C5_Unsub	yes	yes	no	no	yes	yes	yes	yes	yes	yes	no	no	no	no	no	no	no
O_C6_Unsub	yes	no	yes	no	no	no	no	no	no	no	no	no	no	no	no	no	no
O_C7_Unsub	yes	no	no	no	yes	yes	yes	yes	yes	no	no	no	no	no	no	no	no
O_C8_Unsub	no	yes	no	no	no	no	no	no	no	yes	no	no	no	no	no	no	yes
[truncated: 20 more columns]

## Sheet: Figure4
Lectins	Recombinant Spike Glycoprotein Replicate 1	Recombinant Spike Glycoprotein Replicate 2	Recombinant Spike Glycoprotein Replicate 3	Recombinant Spike Glycoprotein Replicate 4	Average for Recombinant Spike Glycoprotein
AAA	9.61219	4.69737	16.8605	26.5619	14.433
AAL	87.2654	69.6071	148.764	235.771	135.352
ABA	30.0988	10.8422	25.0866	44.5468	27.6436
ABL	100.491	57.5223	204.044	143.409	126.367
ACG	47.6304	29.5429	84.6415	139.455	75.3174
ACL	91.9258	97.8527	203.99	268.545	165.578
AMA	78.1513	73.847	110.468	162.261	106.182
ASA	85.4755	88.6765	152.838	331.275	164.566
BANLEC	90.0811	139.515	243.765	589.563	265.731
BC2L-A	84.2977	185.109	72.0096	315.619	164.259
BC2LCN	-0.13509	2.5262	26.527	12.3149	10.3083
BPA	2.65106	-2.30772	-1.77925	-4.31564	-1.43789
CA	48.6266	221.118	153.169	341.676	191.147
CAA	41.9905	100.208	111.045	137.234	97.6194
CALSEPA	56.2674	215.608	227.028	268.274	191.794
CGL2	62.8106	75.035	102.827	101.156	85.457
CNL	22.9814	17.6424	30.1471	50.6681	30.3598
Con A	101.188	110.921	140.33	208.902	140.335
CPA	3.25472	14.3447	60.1941	76.7786	38.643
CSA	14.6568	-0.48476	26.1958	23.2575	15.9063
DBA	11.7989	23.9716	34.7146	28.1329	24.6545
DISCOIDIN I	-1.84899	-3.70054	20.6809	0.072228	3.8009
DISCOIDIN II	28.3047	41.0747	65.9786	48.1221	45.87
DSA	29.6935	42.3651	119.572	183.604	93.8086
ECA	-1.59148	-1.89806	22.0442	13.1275	7.92054
EEL	4.68579	3.34551	46.5532	23.2033	19.447
F17AG	5.75803	0.109241	38.6197	7.43951	12.9816
GAL1	0.173079	-1.22213	14.9426	16.8653	7.68971
GAL1-S	27.8276	98.6106	83.6324	95.7927	76.4659
GAL2	1.02581	0.109241	8.97327	1.96822	3.01913
GAL3	48.2889	131.936	120.951	156.519	114.424
GAL3C-S	15.4504	61.1067	87.5144	41.134	51.3014
GAL7-S	9.67973	11.5591	12.5857	18.3821	13.0517
GAL9	16.624	8.24088	36.0548	7.22282	17.0356
GHA	1.09335	3.46841	7.84872	34.2001	11.6526
GNA	123.245	418.059	195.771	591.513	332.147
GRFT	50.1337	119.933	121.913	362.098	163.52
GS-I	-1.45639	-3.06558	24.9095	36.3128	14.1751
GS-II	89.2325	352.76	247.462	557.06	311.629
HAA	-1.40996	7.05288	42.6327	10.9606	14.8091
HHA	64.4148	465.231	242.063	417.624	297.333
HMA	1.10601	18.0316	40.3066	31.9249	22.8423
IRA	6.501	5.02509	-1.17846	76.0202	21.592
Jacalin	-1.44795	-5.21626	-0.27729	0.018057	-1.73086
LAL	1.04269	2.42379	7.06308	2.34742	3.21924
LBA	-2.62573	-3.0451	2.39544	4.73095	0.363891
LcH A	32.5514	138.859	128.137	111.123	102.668
LEA	14.222	9.57225	10.352	8.68545	10.7079
LENTIL	67.7244	247.684	201.918	507.602	256.232
Lotus	8.93254	0.682757	4.82169	62.6399	19.2692
LPA	-1.1229	24.5041	-3.25811	328.783	87.2265
LSL-N	47.947	130.154	121.428	383.875	170.851
MAA	28.9759	102.687	152.592	7.11448	72.8422
MALECTIN	14.222	92.7116	92.313	197.039	99.0713
MNA-G	24.4252	63.5237	101.286	102.456	72.9227
MNA-M	62.6164	323.019	190.01	499.856	268.875
MOA	28.8492	89.9874	121.074	42.5966	70.6267
MPL	11.592	31.4273	33.2127	87.7212	40.9883
NPA	117.609	525.204	253.809	253.431	287.513
ORYSATA	33.2606	125.115	152.684	329.921	160.245
PA-IIL	42.6913	35.0937	99.4531	40.4839	54.4305
PA-IL	-2.8959	-4.31502	0.023107	-2.04045	-2.30707
PALa	32.3657	176.179	147.046	246.118	150.427
PHA-E	67.8637	324.781	191.358	389.13	243.283
PHA-L	160.051	247.458	178.972	433.983	255.116
PHA-P	60.0329	253.173	161.427	281.979	189.153
PNA	-0.49813	1.91172	-0.10783	34.8501	9.03897
PPL	-1.92919	-5.09337	-5.26843	6.95197	-1.33475
PSA	54.5915	192.114	205.823	533.658	246.547
PSL1A	-0.37993	-1.16069	8.07209	4.13507	2.66664
PTL-1	18.5912	113.01	104.259	75.4785	77.8348
PTL-2	65.01	270.706	185.104	469.628	247.612
PWA	-1.50705	-1.87758	20.627	3.05164	5.0735
RCA 120	120.522	14.4676	323.577	33.6584	123.056
RCA 60	78.4679	168.969	180.428	41.2423	117.277
RPA	18.0002	52.8932	23.9544	43.8425	34.6726
RS-FUC	54.0258	218.332	117.823	181.762	142.986
SAMB	32.1588	26.0404	44.5121	92.1091	48.7051
SBA	47.3011	144.717	125.21	150.722	116.988
SHA	-2.90012	-3.0451	-5.25302	15.6735	1.11882
SJA	-2.99299	-5.21626	-4.82169	-0.74034	-3.44282
SNA-I	23.5598	43.5531	69.8452	75.316	53.0685
SNA-II	-1.62525	-2.47158	-5.93854	0.343084	-2.42307
SSA	-2.24158	-4.97047	-1.83317	-7.13254	-4.04444
STL	22.6058	1.13338	6.25433	68.4904	24.621
TL	26.8736	307.063	173.696	485.175	248.202
UDA	52.1473	79.2339	138.689	82.3582	88.1071
UEA I	4.51693	10.0229	13.6255	1.26399	7.35733
UEA-II	-2.21625	-1.20165	-11.5921	7.43951	-1.89262
VFA	-0.02955	-3.37282	-11.4226	-1.71542	-4.1351
VRA	-2.5413	6.23357	-7.15551	5.32683	0.465898
VVA	29.4445	47.24	72.1713	33.225	45.5202
VVA-M	11.115	-1.69324	10.3828	-4.47815	3.83161
WFA	22.3989	37.654	55.434	14.5901	32.5193
WGA	17.6118	55.7608	79.7967	79.8122	58.2454

## Sheet: Figure6b
Lectins with negative value were changed to 1 and highligted	Spike spot 1	Spike spot 2	Spike plus L-Fucose spot 1	Spike plus L-Fucose spot 2	Fold change spot 1	Fold change spot 2	Average Fold change for Replicate 1	p-value in paired T-test for Replicate 1			Lectins with negative value were changed to 1 and highligted	Spike spot 1	Spike spot 2	Spike plus L-Fucose spot 1	Spike plus L-Fucose spot 2	Fold change spot 1	Fold change spot 2	Average Fold change for Replicate 2	p-value in paired T-test for Replicate 2		Lectins with negative value were changed to 1 and highligted	Spike spot 1	Spike spot 2	Spike plus L-Fucose spot 1	Spike plus L-Fucose spot 2	Fold change spot 1	Fold change spot 2	Average Fold change for Replicate 3	p-value in paired T-test for Replicate 3		Lectins	p-value in T-test Replicate 1	p-value in T-test Replicate 2	p-value in T-test Replicate 3	Average fold change in Replicate 1	Average fold change in Replicate 2	Average fold change in Replicate 3	Average average Fold change
AAA	9.32758	24.3934	21.4359	25.1739	0.435137	0.968995	0.702066	0.45902			AAA	76.7637	11.4174	65.9588	16.9867	1.16381	0.672139	0.917976	0.802981		AAA	104.143	1	37.3676	32.9582	2.78699	0.0303415	1.40867	0.78417		AAA	0.45902	0.802981	0.78417	0.702066	0.917976	1.39501	1.00502
AAL	128.052	169.475	12.6191	13.8381	10.1474	12.2471	11.1973	0.0937385			AAL	170.019	89.7331	87.284	1	1.94789	89.7331	45.8405	0.0222596		AAL	1187.11	626.02	72.643	1	16.3416	626.02	321.181	0.174613		AAL	0.0937385	0.0222596	0.174613	11.1973	449.64	3138.27	1199.7
ABA	25.9031	24.2702	30.5372	28.8713	0.848248	0.840634	0.844441	0.00227095			ABA	107.817	37.0053	91.9761	27.9162	1.17223	1.32559	1.24891	0.168383		ABA	62.4437	30.8315	90.8766	24.0599	0.687127	1.28145	0.984288	0.648845		ABA	0.00227095	0.168383	0.648845	0.844441	1.24891	0.984288	1.02588
ABL	150.574	257.514	174.836	141.113	0.861228	1.82488	1.34305	0.630823			ABL	159.762	89.2203	130.51	125.453	1.22414	0.711185	0.96766	0.932391		ABL	1013.85	646.743	655.959	620.961	1.5456	1.04152	1.29356	0.454218		ABL	0.630823	0.932391	0.454218	1.34305	0.96766	1.29356	1.20142
ACG	83.4553	85.8276	102.148	97.0492	0.817001	0.884372	0.850687	0.155814			ACG	141.246	89.9356	105.35	88.2393	1.34073	1.01922	1.17998	0.469939		ACG	758.547	457.365	734.256	374.51	1.03308	1.22124	1.12716	0.318447		ACG	0.155814	0.469939	0.318447	0.850687	1.17998	1.12716	1.05261
ACL	236.147	171.832	670.548	208.58	0.352171	0.823821	0.587996	0.446274			ACL	192.679	146.51	135.301	74.5563	1.42407	1.96509	1.69458	0.0714458		ACL	858.364	460.657	564.672	425.437	1.52011	1.08279	1.30145	0.424018		ACL	0.446274	0.0714458	0.424018	0.587996	1.69458	1.30145	1.19468
AMA	116.56	104.375	873.314	128.396	0.133469	0.812917	0.473193	0.479799			AMA	137.319	86.8315	140.822	69.794	0.975126	1.24411	1.10962	0.629084		AMA	903.651	826.667	758.011	643.445	1.19213	1.28475	1.23844	0.0724381		AMA	0.479799	0.629084	0.0724381	0.473193	1.10962	1.23844	0.940418
ASA	164.222	141.454	712.682	118.279	0.230429	1.19594	0.713185	0.526885			ASA	155.268	90.9477	136.692	96.4856	1.1359	0.942604	1.03925	0.684441		ASA	916.228	749.894	786.414	677.648	1.16507	1.10661	1.13584	0.176694		ASA	0.526885	0.684441	0.176694	0.713185	1.03925	1.13584	0.96276
BANLEC	250.104	237.426	462.784	452.058	0.540433	0.525211	0.532822	0.00290764			BANLEC	189.116	136.361	177.909	147.972	1.06299	0.921529	0.99226	0.988703		BANLEC	1256.53	1413.96	1216.27	1083.67	1.0331	1.30479	1.16894	0.422779		BANLEC	0.00290764	0.988703	0.422779	0.532822	0.99226	1.16894	0.898009
BC2L-A	6.43149	137.588	252.095	207.645	0.0255122	0.662609	0.344061	0.323145			BC2L-A	96.6024	74.1456	89.6582	55.7879	1.07745	1.32906	1.20326	0.269772		BC2L-A	1324.91	1245.6	945.471	994.293	1.40132	1.25275	1.32704	0.127583		BC2L-A	0.323145	0.269772	0.127583	0.344061	1.20326	1.32704	0.958118
BC2LCN	30.8788	22.1752	6.19953	15.3414	4.98084	1.44545	3.21314	0.328027			BC2LCN	1	1	1	1	1	1	1	#DIV/0!		BC2LCN	79.2839	49.2755	20.6435	29.1843	3.84062	1.68842	2.76452	0.289863		BC2LCN	0.328027	#DIV/0!	0.289863	3.21314	1	2.76452	2.32589
BPA	1	1	5.2244	1	0.19141	1	0.595705	0.5			BPA	1	1	1	1	1	1	1	#DIV/0!		BPA	122.967	72.4465	26.9597	64.2611	4.56114	1.12738	2.84426	0.445854		BPA	0.5	#DIV/0!	0.445854	0.50957	1	2.84426	1.45128
CA	153.408	152.931	173.638	166.832	0.883497	0.916675	0.900086	0.116709			CA	94.5106	78.1268	132.997	125.2	0.710622	0.624015	0.667319	0.06368		CA	773.066	845.196	878.972	825.9	0.879511	1.02336	0.951437	0.614727		CA	0.116709	0.06368	0.614727	0.900086	0.667319	0.951437	0.839614
CAA	119.287	102.804	125.917	136.583	0.947343	0.752685	0.850014	0.376608			CAA	67.978	56.9115	121.351	112.458	0.560177	0.506067	0.533122	0.0127048		CAA	573.769	450.612	517.399	485.143	1.10895	0.928823	1.01889	0.849899		CAA	0.376608	0.0127048	0.849899	0.850014	0.533122	1.01889	0.800674
CALSEPA	237.457	216.599	224.812	161.509	1.05625	1.34109	1.19867	0.35636			CALSEPA	88.64	59.8941	113.02	141.426	0.784283	0.423501	0.603892	0.31502		CALSEPA	692.537	743.986	730.204	842.982	0.948415	0.882564	0.91549	0.26854		CALSEPA	0.35636	0.31502	0.26854	1.19867	0.603892	0.91549	0.906017
CGL2	111.892	93.7611	113.809	73.3617	0.983158	1.27807	1.13061	0.559644			CGL2	97.7901	48.9085	46.1086	54.959	2.12086	0.889909	1.50539	0.574193		CGL2	579.593	646.152	595.498	520.458	0.973292	1.24151	1.1074	0.580128		CGL2	0.559644	0.574193	0.580128	1.13061	1.50539	1.1074	1.2478
CNL	36.7789	23.5154	34.2752	41.0401	1.07305	0.572985	0.823016	0.59034			CNL	23.1722	7.62509	11.6905	11.1004	1.98214	0.686917	1.33453	0.687115		CNL	116.045	152.089	120.591	107.243	0.962308	1.41817	1.19024	0.564304		CNL	0.59034	0.687115	0.564304	0.823016	1.33453	1.19024	1.11593
Con A	154.687	125.972	121.184	126.648	1.27647	0.994662	1.13556	0.512845			Con A	96.0221	97.7631	101.276	67.0124	0.948123	1.45888	1.2035	0.60773		Con A	659.954	602.891	636.931	590.572	1.03615	1.02086	1.0285	0.187219		Con A	0.512845	0.60773	0.187219	1.13556	1.2035	1.0285	1.12252
CPA	41.123	79.2652	41.1011	47.6223	1.00053	1.66446	1.33249	0.499559			CPA	12.6995	9.21758	63.7111	7.08265	0.199329	1.30143	0.75038	0.526628		CPA	93.0008	37.0357	95.6435	31.5678	0.972369	1.17321	1.07279	0.786609		CPA	0.499559	0.526628	0.786609	1.33249	0.75038	1.07279	1.05189
CSA	25.5488	26.8428	22.0657	27.5711	1.15785	0.973583	1.06572	0.631234			CSA	5.61422	5.46577	0.25521	1	21.9985	5.46577	13.7321	0.0577211		CSA	32.3931	59.7425	22.1531	64.9762	1.46224	0.919453	1.19085	0.800793		CSA	0.631234	0.0577211	0.800793	1.06572	38.3281	1.19085	13.5282
DBA	38.1653	31.264	34.2142	25.113	1.11548	1.24493	1.18021	0.136504			DBA	9.66294	3.25247	4.55397	5.95879	2.12187	0.545827	1.33385	0.810122		DBA	25.9356	165.848	55.9984	29.8199	0.463148	5.56166	3.01241	0.63847		DBA	0.136504	0.810122	0.63847	1.18021	1.33385	3.01241	1.84215
DISCOIDIN I	18.971	22.3908	13.9599	14.0615	1.35896	1.59235	1.47565	0.155204			DISCOIDIN I	4.23766	0.0944701	1	1	4.23766	0.0944701	2.16606	0.673618		DISCOIDIN I	1	14.3289	3.24417	1	0.308245	14.3289	7.31859	0.606191		DISCOIDIN I	0.155204	0.673618	0.606191	1.47565	21.6606	71.66	31.5988
DISCOIDIN II	55.4802	76.4769	88.3746	76.9371	0.627785	0.994018	0.810902	0.491094			DISCOIDIN II	39.8934	18.1653	3.78132	18.1667	10.5501	0.99992	5.77503	0.500026		DISCOIDIN II	377.553	416.383	514.738	410.302	0.733487	1.01482	0.874154	0.528201		DISCOIDIN II	0.491094	0.500026	0.528201	0.810902	5.77503	0.874154	2.48669
DSA	73.4884	165.655	137.497	128.66	0.534473	1.28754	0.911009	0.833632			DSA	83.3361	57.5998	47.8647	88.1971	1.74108	0.65308	1.19708	0.953119		DSA	808.181	910.235	682.534	805.164	1.18409	1.1305	1.15729	0.056625		DSA	0.833632	0.953119	0.056625	0.911009	1.19708	1.15729	1.08846
ECA	14.2417	29.8467	0.511266	5.26503	27.8557	5.66886	16.7623	0.17571			ECA	1	1	1	1	1	1	1	#DIV/0!		ECA	50.2462	111.825	1	10.6727	50.2462	10.4777	30.3619	0.211563		ECA	0.17571	#DIV/0!	0.211563	16.7623	1	256.47	91.4107
EEL	72.7028	20.4036	16.4993	20.4405	4.4064	0.998195	2.7023	0.500418			EEL	1	10.7426	3.61274	1	0.276798	10.7426	5.5097	0.666802		EEL	19.4358	7.44935	1	1	19.4358	7.44935	13.4426	0.285764		EEL	0.500418	0.666802	0.285764	2.7023	53.7269	134.426	63.6184
F17AG	43.5878	33.6517	20.3999	19.5873	2.13667	1.71804	1.92735	0.152905			F17AG	1	1	1	1	1	1	1	#DIV/0!		F17AG	36.6981	37.8376	17.0683	30.6144	2.15007	1.23594	1.69301	0.27553		F17AG	0.152905	#DIV/0!	0.27553	1.92735	1	1.69301	1.54012
GAL1	16.0749	13.8104	15.1585	20.4608	1.06045	0.674967	0.867708	0.587167			GAL1	1	1	1	1	1	1	1	#DIV/0!		GAL1	23.2344	42.3537	29.3035	31.6472	0.792888	1.33831	1.0656	0.828305		GAL1	0.587167	#DIV/0!	0.828305	0.867708	1	1.0656	0.977768
GAL1-S	86.0895	81.1754	126.059	184.344	0.682928	0.440348	0.561638	0.264694			GAL1-S	63.16	44.347	75.4554	45.5046	0.837051	0.974561	0.905806	0.440239		GAL1-S	265.243	336.529	351.192	258.475	0.755267	1.30198	1.02862	0.969382		GAL1-S	0.264694	0.440239	0.969382	0.561638	0.905806	1.02862	0.832023
GAL2	12.1004	5.84611	13.0661	11.4409	0.926096	0.510985	0.71854	0.391193			GAL2	1	1	1	1	1	1	1	#DIV/0!		GAL2	1	6.64744	10.0371	3.95922	0.0996306	1.67898	0.889305	0.684066		GAL2	0.391193	#DIV/0!	0.684066	0.71854	1	0.844471	0.854337
GAL3	141.177	100.724	127.238	164.13	1.10955	0.613684	0.861619	0.637764			GAL3	62.1748	67.5057	90.6275	100.419	0.686048	0.672239	0.679144	0.0461957		GAL3	415.075	374.346	472.391	518.591	0.878667	0.721852	0.800259	0.259214		GAL3	0.637764	0.0461957	0.259214	0.861619	0.679144	0.800259	0.78034
GAL3C-S	119.533	55.4956	22.4111	47.1347	5.33367	1.17738	3.25553	0.44533			GAL3C-S	36.7084	38.6248	89.9953	55.9986	0.407892	0.689746	0.548819	0.299354		GAL3C-S	401.949	391.397	305.27	376.615	1.3167	1.03925	1.17797	0.403413		GAL3C-S	0.44533	0.299354	0.403413	3.25553	0.548819	1.17797	1.66077
GAL7-S	23.7002	1.47115	36.002	34.5799	0.658304	0.0425436	0.350424	0.273524			GAL7-S	5.93812	2.05135	8.642	12.3929	0.687123	0.165527	0.426325	0.337195		GAL7-S	37.1624	1	10.0768	14.1287	3.68791	0.0707779	1.87934	0.787334		GAL7-S	0.273524	0.337195	0.787334	0.350424	0.426325	1.84749	0.874748
GAL9	42.8946	29.2151	39.1305	55.017	1.09619	0.53102	0.813606	0.592221			GAL9	22.9427	21.3098	37.9185	19.6839	0.605054	1.0826	0.843826	0.568845		GAL9	45.9834	1	31.6075	41.8565	1.45482	0.0238912	0.739358	0.71539		GAL9	0.592221	0.568845	0.71539	0.813606	0.843826	0.728607	0.795346
GHA	13.0401	2.65732	12.8223	17.7386	1.01699	0.149805	0.583397	0.509195			GHA	7.74655	15.6281	1	1	7.74655	15.6281	11.6873	0.224895		GHA	41.2563	2.8489	99.2982	40.6647	0.415479	0.0700583	0.242769	0.132385		GHA	0.509195	0.224895	0.132385	0.583397	116.873	0.242769	39.2331
GNA	208.942	182.6	550.282	297.987	0.379701	0.612779	0.49624	0.292474			GNA	93.1071	84.8072	115.718	86.4692	0.804606	0.980779	0.892692	0.453288		GNA	1375.22	1415.27	1291.59	1349.43	1.06475	1.04879	1.05677	0.0753986		GNA	0.292474	0.453288	0.0753986	0.49624	0.892692	1.05677	0.815234
GRFT	144.905	98.9217	277.001	344.651	0.52312	0.28702	0.40507	0.185988			GRFT	62.6742	59.7051	86.2163	101.796	0.726941	0.586518	0.65673	0.175343		GRFT	360.038	416.088	355.84	339.711	1.0118	1.22483	1.11831	0.46504		GRFT	0.185988	0.175343	0.46504	0.40507	0.65673	1.11831	0.726704
GS-I	21.8517	27.9673	13.9396	1	1.56759	27.9673	14.7675	0.318319			GS-I	1	1	1	1	1	1	1	#DIV/0!		GS-I	24.7538	20.8708	10.7124	109.15	2.31076	0.191213	1.25099	0.600418		GS-I	0.318319	#DIV/0!	0.600418	140.621	1	1.25099	47.6238
GS-II	217.769	277.155	470.281	270.826	0.463063	1.02337	0.743216	0.515953			GS-II	109.855	100.314	110.604	96.893	0.99323	1.0353	1.01427	0.637193		GS-II	991.861	888.921	937.963	876.589	1.05746	1.01407	1.03577	0.356805		GS-II	0.515953	0.637193	0.356805	0.743216	1.01427	1.03577	0.931083
HAA	32.4963	52.769	68.6892	1.26293	0.473093	41.783	21.1281	0.889948			HAA	1	1	1	1	1	1	1	#DIV/0!		HAA	1	1	6.22352	1	0.160681	1	0.58034	0.5		HAA	0.889948	#DIV/0!	0.5	21.1281	1	0.508034	7.54536
HHA	207.387	276.739	246.244	226.274	0.842199	1.22302	1.03261	0.917736			HHA	115.254	144.931	75.9892	64.7506	1.51671	2.23829	1.8775	0.210099		HHA	1091.38	955.564	1068.22	873.769	1.02168	1.09361	1.05765	0.324324		HHA	0.917736	0.210099	0.324324	1.03261	1.8775	1.05765	1.32259
HMA	33.1587	47.4544	33.0156	12.4363	1.00433	3.81579	2.41006	0.497398			HMA	1	1	1	1	1	1	1	#DIV/0!		HMA	6.94288	8.67333	1.21822	26.8008	5.6992	0.323621	3.01141	0.694734		HMA	0.497398	#DIV/0!	0.694734	2.41006	1	3.01141	2.14049
IRA	1	8.51113	25.885	7.43876	0.0386324	1.14416	0.591396	0.527417			IRA	1	1	1	1	1	1	1	#DIV/0!		IRA	118.789	96.715	93.9751	119.319	1.26404	0.810555	1.0373	0.970362		IRA	0.527417	#DIV/0!	0.970362	0.574012	1	1.0373	0.870437
Jacalin	1	4.38265	5.75259	1	0.173835	4.38265	2.27824	0.893792			Jacalin	1	1	1	1	1	1	1	#DIV/0!		Jacalin	96.9682	74.2614	39.6716	42.1743	2.44427	1.76082	2.10255	0.175004		Jacalin	0.893792	#DIV/0!	0.175004	21.922	1	2.10255	8.3415
LAL	8.66518	5.46099	2.685	9.08429	3.22726	0.601146	1.9142	0.846789			LAL	1	1	1	1	1	1	1	#DIV/0!		LAL	75.3165	55.6064	51.0328	85.7124	1.47584	0.648755	1.0623	0.932109		LAL	0.846789	#DIV/0!	0.932109	1.9142	1	1.0623	1.3255
LBA	1	13.872	1.7505	1	0.571267	13.872	7.22163	0.537076			LBA	1	1	1	1	1	1	1	#DIV/0!		LBA	49.6131	15.5529	99.3379	59.4147	0.499438	0.261768	0.380603	0.0398307		LBA	0.537076	#DIV/0!	0.0398307	69.3885	1	0.380603	23.5897
LcH A	123.292	132.982	125.937	100.564	0.978994	1.32236	1.15068	0.551837			LcH A	96.9803	79.9082	55.24	77.2395	1.75562	1.03455	1.39508	0.459352		LcH A	105.831	106.338	41.4195	58.9778	2.55511	1.80302	2.17907	0.0963786		LcH A	0.551837	0.459352	0.0963786	1.15068	1.39508	2.17907	1.57494
LEA	10.56	10.144	17.4745	13.0458	0.604308	0.777573	0.690941	0.247048			LEA	25.0076	19.2584	5.79021	1	4.31894	19.2584	11.7887	0.0162869		LEA	103.89	147.489	128.933	120.392	0.805769	1.22507	1.01542	0.974933		LEA	0.247048	0.0162869	0.974933	0.690941	98.4515	1.01542	33.386
LENTIL	187.006	216.83	259.998	212.094	0.719261	1.02233	0.870794	0.541243			LENTIL	88.9639	69.7999	92.7488	69.6254	0.959192	1.00251	0.980849	0.529338		LENTIL	727.821	628.679	654.926	607.534	1.1113	1.0348	1.07305	0.320269		LENTIL	0.541243	0.529338	0.320269	0.870794	0.980849	1.07305	0.974899
Lotus	8.37249	1.27089	45.7736	15.7883	0.182911	0.0804958	0.131703	0.264289			Lotus	0.674787	1	1	1	0.674787	1	0.837393	0.5		Lotus	37.4156	73.3751	0.264831	1	141.281	73.3751	107.328	0.198091		Lotus	0.264289	0.5	0.198091	0.131703	3.87393	437.516	147.174
LPA	1	1	12.8629	8.49515	0.0777428	0.117714	0.0977285	0.141275			LPA	1	1	1	1	1	1	1	#DIV/0!		LPA	1	1	1	1	1	1	1	#DIV/0!		LPA	0.141275	#DIV/0!	#DIV/0!	0.00977285	1	1	0.669924
LSL-N	95.7021	147.154	181.5	185.867	0.527285	0.791715	0.6595	0.230158			LSL-N	112.055	50.4066	87.0873	125.158	1.2867	0.402743	0.84472	0.70522		LSL-N	554.143	572.84	533.448	562.963	1.0388	1.01754	1.02817	0.216518		LSL-N	0.230158	0.70522	0.216518	0.6595	0.84472	1.02817	0.84413
MAA	182.046	123.138	132.723	219.509	1.37162	0.560969	0.966297	0.801149			MAA	50.6765	12.1192	34.856	31.8356	1.45388	0.380679	0.91728	0.930483		MAA	373.248	448.839	406.131	325.172	0.919035	1.38031	1.14967	0.665445		MAA	0.801149	0.930483	0.665445	0.966297	0.91728	1.14967	1.01108
MALECTIN	87.137	97.489	239.215	179.448	0.364262	0.543272	0.453767	0.185318			MALECTIN	47.4645	31.1481	14.4439	20.597	3.28612	1.51226	2.39919	0.303108		MALECTIN	250.64	391.861	149.311	215.651	1.67864	1.8171	1.74787	0.167768		MALECTIN	0.185318	0.303108	0.167768	0.453767	2.39919	1.74787	1.53361
MNA-G	98.9371	103.636	160.026	134.246	0.618255	0.77198	0.695117	0.204281			MNA-G	28.7999	23.8605	15.2306	47.6539	1.89092	0.500703	1.19581	0.829954		MNA-G	142.888	121.954	106.687	111.573	1.33932	1.09304	1.21618	0.322214		MNA-G	0.204281	0.829954	0.322214	0.695117	1.19581	1.21618	1.0357
MNA-M	184.603	195.417	315.844	327.81	0.584475	0.596129	0.590302	0.00278067			MNA-M	99.9629	78.5991	63.8094	94.4346	1.56659	0.832313	1.19945	0.762819		MNA-M	790.792	699.585	751.496	688.414	1.05229	1.01623	1.03426	0.323669		MNA-M	0.00278067	0.762819	0.323669	0.590302	1.19945	1.03426	0.941337
MOA	120.103	122.044	114.541	154.846	1.04856	0.788165	0.918365	0.606942			MOA	33.9957	23.0642	26.2304	26.5535	1.29604	0.868594	1.08232	0.768848		MOA	356.746	301.161	375.781	268.008	0.949345	1.1237	1.03652	0.831818		MOA	0.606942	0.768848	0.831818	0.918365	1.08232	1.03652	1.0124
MPL	35.1922	31.2332	84.535	61.4773	0.416303	0.508044	0.462173	0.149937			MPL	17.342	15.2637	8.74034	7.15289	1.98413	2.13392	2.05903	0.018694		MPL	69.9986	235.784	46.8618	71.5704	1.49373	3.29443	2.39408	0.41089		MPL	0.149937	0.018694	0.41089	0.462173	2.05903	2.39408	1.63843
NPA	206.216	301.402	307.251	302.721	0.671164	0.995644	0.833404	0.491691			NPA	110.705	92.1893	107.022	129.288	1.03442	0.713053	0.873737	0.563006		NPA	1478.37	1519.01	1339.22	1313.8	1.1039	1.1562	1.13005	0.120673		NPA	0.491691	0.563006	0.120673	0.833404	0.873737	1.13005	0.945731
ORYSATA	148.279	157.09	150.275	167.177	0.986714	0.939661	0.963187	0.375602			ORYSATA	127.481	109.531	72.0698	71.1707	1.76885	1.539	1.65392	0.114504		ORYSATA	325.387	331.169	323.067	305.151	1.00718	1.08526	1.04622	0.44338		ORYSATA	0.375602	0.114504	0.44338	0.963187	1.65392	1.04622	1.22111
PA-IIL	86.5979	112.308	1	1	86.5979	112.308	99.4531	0.0826574			PA-IIL	47.9638	49.2729	1	1.25263	47.9638	39.3354	43.6496	0.00708045		PA-IIL	285.165	239.118	33.554	0.542903	8.49867	440.443	224.471	0.0169257		PA-IIL	0.0826574	0.00708045	0.0169257	994.531	259.487	224.471	492.83
PA-IL	7.74089	1	2.8272	2.70531	2.738	0.369643	1.55382	0.712661			PA-IL	1	1	1	1	1	1	1	#DIV/0!		PA-IL	111.065	187.036	73.1197	112.407	1.51895	1.66391	1.59143	0.200541		PA-IL	0.712661	#DIV/0!	0.200541	1.38748	1	1.59143	1.3263
PALa	159.724	134.368	185.441	299.572	0.861322	0.448534	0.654928	0.401689			PALa	34.0092	28.7864	23.7439	21.0887	1.43234	1.36501	1.39868	0.0903894		PALa	407.182	241.313	512.95	449.788	0.793804	0.536503	0.665154	0.201105		PALa	0.401689	0.0903894	0.201105	0.654928	1.39868	0.665154	0.906252
PHA-E	231.526	151.19	242.344	349.222	0.955362	0.432934	0.694148	0.465258			PHA-E	110.948	61.7835	60.775	62.5591	1.82556	0.987601	1.40658	0.509841		PHA-E	1021.87	970.927	948.769	872.418	1.07705	1.11292	1.09498	0.0935759		PHA-E	0.465258	0.509841	0.0935759	0.694148	1.40658	1.09498	1.06524
PHA-L	201.471	156.474	208.113	216.787	0.968087	0.721786	0.844937	0.43018			PHA-L	90.8533	118.115	60.3676	47.078	1.505	2.50892	2.00696	0.241925		PHA-L	909.602	809.447	842.545	765.757	1.07959	1.05705	1.06832	0.132383		PHA-L	0.43018	0.241925	0.132383	0.844937	2.00696	1.06832	1.30674
PHA-P	176.515	146.338	184.567	189.402	0.956375	0.772628	0.864502	0.382331			PHA-P	95.5903	85.0636	52.2618	61.9831	1.82907	1.37237	1.60072	0.188405		PHA-P	783.786	879.003	667.28	684.004	1.1746	1.28508	1.22984	0.157144		PHA-P	0.382331	0.188405	0.157144	0.864502	1.60072	1.22984	1.23169
PNA	7.94115	1	18.023	8.82019	0.440612	0.113376	0.276994	0.0800032			PNA	1	1	1	1	1	1	1	#DIV/0!		PNA	1	1	1	29.8199	1	0.0335346	0.516767	0.5		PNA	0.0800032	#DIV/0!	0.5	0.225975	1	0.501677	0.575884
PPL	1	1	4.75715	2.09585	0.21021	0.477132	0.343671	0.319328			PPL	1	1	1	1	1	1	1	#DIV/0!		PPL	1	1	1	1	1	1	1	#DIV/0!		PPL	0.319328	#DIV/0!	#DIV/0!	0.0343671	1	1	0.678122
PSA	227.752	183.894	233.954	256.93	0.973491	0.715737	0.844614	0.446071			PSA	127.886	125.294	65.9307	60.9857	1.9397	2.05449	1.99709	0.0118665		PSA	600.148	685.615	569.121	528.959	1.05452	1.29616	1.17534	0.375523		PSA	0.446071	0.0118665	0.375523	0.844614	1.99709	1.17534	1.33901
PSL1A	9.52784	6.61634	37.0787	29.4198	0.256963	0.224894	0.240928	0.0598428			PSL1A	1	2.2133	1	1	1	2.2133	1.60665	0.5		PSL1A	6.98509	0.358751	31.0117	47.2193	0.225241	0.00759755	0.116419	0.198385		PSL1A	0.0598428	0.5	0.198385	0.240928	11.5665	0.116419	3.97462
PTL-1	115.158	93.3605	87.7855	58.4909	1.31181	1.59615	1.45398	0.0763103			PTL-1	35.5343	33.132	40.6439	31.8216	0.874283	1.04118	0.957732	0.659826		PTL-1	237.894	215.651	185.739	355.204	1.2808	0.60712	0.943959	0.727692		PTL-1	0.0763103	0.659826	0.727692	1.45398	0.957732	0.943959	1.11856
PTL-2	188.608	181.599	89.9998	65.3778	2.09565	2.77769	2.43667	0.052077			PTL-2	115.807	69.665	61.8708	48.7357	1.87175	1.42945	1.6506	0.264353		PTL-2	350.879	383.42	16.9094	28.2707	20.7505	13.5625	17.1565	0.0195599		PTL-2	0.052077	0.264353	0.0195599	2.43667	1.6506	17.1565	7.08125
PWA	40.0755	1.17846	26.3929	1	1.51842	1.17846	1.34844	0.491697			PWA	1.44404	2.10533	1	1	1.44404	2.10533	1.77469	0.256815		PWA	53.6227	45.0971	17.0286	17.1081	3.14898	2.63601	2.8925	0.0843266		PWA	0.491697	0.256815	0.0843266	6.65153	17.7469	2.8925	9.09697
RCA 120	358.692	288.462	305.057	348.795	1.17582	0.827023	1.00142	0.962627			RCA 120	153.635	168.346	101.431	94.3222	1.51469	1.7848	1.64974	0.108964		RCA 120	2355.2	2230.44	2271.88	2406.94	1.03668	0.92667	0.981673	0.780792		RCA 120	0.962627	0.108964	0.780792	1.00142	1.64974	0.981673	1.21095
RCA 60	196.095	164.762	251.587	256.3	0.779431	0.642846	0.711139	0.153056			RCA 60	115.739	116.212	76.2561	68.0379	1.51777	1.70804	1.61291	0.0629107		RCA 60	889.385	815.103	796.663	723.332	1.11639	1.12687	1.12163	0.00328129		RCA 60	0.153056	0.0629107	0.00328129	0.711139	1.61291	1.12163	1.14856
RPA	32.789	15.1198	115.617	79.5578	0.2836	0.190048	0.236824	0.0790901			RPA	14.265	83.8895	16.4388	2.96652	0.867765	28.2788	14.5733	0.517097		RPA	221.518	206.113	132.945	178.946	1.66624	1.15182	1.40903	0.310537		RPA	0.0790901	0.517097	0.310537	0.236824	14.5733	1.40903	5.40637
RS-FUC	116.021	119.626	6.423	4.10706	18.0634	29.1268	23.5951	0.0167395			RS-FUC	43.8476	73.9296	1	1	43.8476	73.9296	58.8886	0.161832		RS-FUC	814.934	690.553	100.649	95.0477	8.0968	7.26533	7.68107	0.0575751		RS-FUC	0.0167395	0.161832	0.0575751	23.5951	588.886	7.68107	206.721
SAMB	51.0745	37.9496	178.696	117.568	0.285818	0.32279	0.304304	0.144907			SAMB	31.3506	91.3391	16.0314	7.26528	1.95558	12.572	7.26379	0.385259		SAMB	454.622	378.144	346.862	328.946	1.31067	1.14956	1.23012	0.227341		SAMB	0.144907	0.385259	0.227341	0.304304	7.26379	1.23012	2.93274
SBA	165.794	84.626	226.782	144.81	0.73107	0.584392	0.657731	0.00422532			SBA	51.7831	62.8496	76.9024	105.505	0.673362	0.595705	0.634534	0.161182		SBA	541.819	540.342	526.178	490.387	1.02972	1.10187	1.0658	0.306834		SBA	0.00422532	0.161182	0.306834	0.657731	0.634534	1.0658	0.786021
SHA	1	1	5.93543	9.16555	0.16848	0.109104	0.138792	0.153893			SHA	1	1	48.0052	1	0.0208311	1	0.510416	0.5		SHA	15.6373	42.4381	114.394	129.529	0.136697	0.327635	0.232166	0.0399087		SHA	0.153893	0.5	0.0399087	0.0138792	0.501042	0.232166	0.249029
SJA	1	1.11685	1	4.16801	1	0.267957	0.633978	0.5			SJA	1	1	1	1	1	1	1	#DIV/0!		SJA	50.8371	31.4645	106.647	97.312	0.476684	0.323337	0.400011	0.0524051		SJA	0.5	#DIV/0!	0.0524051	0.633978	1	0.400011	0.677996
SNA-I	77.1856	62.5048	98.2884	82.666	0.785296	0.756112	0.770704	0.0145255			SNA-I	37.7071	21.6741	29.9391	26.413	1.25946	0.820586	1.04002	0.848727		SNA-I	202.525	228.398	361.957	177.993	0.559529	1.28319	0.921357	0.69494		SNA-I	0.0145255	0.848727	0.69494	0.770704	1.04002	0.921357	0.910695
SNA-II	1	1	13.9803	12.416	0.0715294	0.0805413	0.0760354	0.0407639			SNA-II	1	1	1	1	1	1	1	#DIV/0!		SNA-II	1	51.0059	62.5927	78.3633	0.0159763	0.65089	0.333433	0.233898		SNA-II	0.0407639	#DIV/0!	0.233898	0.00760354	1	0.326244	0.444616
SSA	7.89494	1	1	26.8601	7.89494	0.0372299	3.96608	0.66588			SSA	1	1	1	1	1	1	1	#DIV/0!		SSA	29.6497	154.326	87.3808	69.2267	0.339316	2.22929	1.2843	0.879476		SSA	0.66588	#DIV/0!	0.879476	39.4766	1	1.2843	13.9203
STL	12.6396	1	7.72317	11.3393	1.63658	0.088189	0.862386	0.782573			STL	6.05958	1	26.5956	22.4655	0.227841	0.0445128	0.136177	0.0140847		STL	240.384	130.184	184.349	255.336	1.30397	0.509854	0.90691	0.768		STL	0.782573	0.0140847	0.768	0.822701	0.116146	0.90691	0.615252
TL	188.916	158.476	126.547	151.21	1.49286	1.04806	1.27046	0.426158			TL	107.925	90.4214	64.8771	69.4287	1.66354	1.30236	1.48295	0.211151		TL	743.31	721.448	659.137	583.183	1.1277	1.23709	1.18239	0.151861		TL	0.426158	0.211151	0.151861	1.27046	1.48295	1.18239	1.31193
UDA	145.413	131.965	334.372	97.6587	0.434885	1.35129	0.893086	0.614336			UDA	81.9056	99.5445	55.521	71.1566	1.47522	1.39895	1.43708	0.0232732		UDA	814.554	872.081	760.832	811.758	1.07061	1.07431	1.07246	0.0368004		UDA	0.614336	0.0232732	0.0368004	0.893086	1.43708	1.07246	1.13421
UEA I	21.6206	5.63044	18.9575	0.653473	1.14048	8.61618	4.87833	0.187217			UEA I	12.0517	1	1	1	12.0517	1	6.52584	0.5		UEA I	1	1	189.989	112.407	0.00526345	0.00889622	0.00707983	0.160901		UEA I	0.187217	0.5	0.160901	4.87833	60.7584	0.000707983	21.8792
UEA-II	1	1	9.4906	8.31231	0.105367	0.120303	0.112835	0.0473794			UEA-II	1	47.1946	1	1	1	47.1946	24.0973	0.5		UEA-II	29.3965	23.9519	215.651	70.8951	0.136315	0.33785	0.237082	0.342822		UEA-II	0.0473794	0.5	0.342822	0.0112835	236.473	0.237082	78.9071
VFA	1	1	7.07308	20.1967	0.141381	0.049513	0.095447	0.304941			VFA	1	0.296906	1	1	1	0.296906	0.648453	0.5		VFA	55.0999	50.7105	195.591	140.612	0.28171	0.360642	0.321176	0.137605		VFA	0.304941	0.5	0.137605	0.0095447	1.98453	0.321176	0.77175
VRA	1	1	9.24681	1	0.108145	1	0.554073	0.5			VRA	1	1	1	1	1	1	1	#DIV/0!		VRA	48.2203	1	40.7839	16.1944	1.18234	0.0617498	0.622043	0.789755		VRA	0.5	#DIV/0!	0.789755	0.505407	1	0.594256	0.699888
VVA	66.0941	78.2485	126.039	112.245	0.524394	0.697122	0.610758	0.171568			VVA	50.3661	75.7111	35.446	39.0986	1.42092	1.93641	1.67867	0.25365		VVA	129.593	133.012	98.027	98.3051	1.32202	1.35305	1.33754	0.030146		VVA	0.171568	0.25365	0.030146	0.610758	1.67867	1.33754	1.20899
VVA-M	15.9978	4.76777	14.4069	28.5463	1.11043	0.167019	0.638725	0.542531			VVA-M	1.45754	1	1	1.44931	1.45754	0.689984	1.07376	0.994223		VVA-M	1	1	37.0895	5.66737	0.0269618	0.176449	0.101705	0.418122		VVA-M	0.542531	0.994223	0.418122	0.638725	7.32219	0.0101705	2.65703
WFA	39.3823	71.4858	95.4646	97.679	0.412533	0.731844	0.572188	0.221835			WFA	16.1814	42.66	6.40834	30.7258	2.52505	1.38841	1.95673	0.0631726		WFA	132.759	176.737	108.197	229.396	1.22702	0.770446	0.998731	0.777849		WFA	0.221835	0.0631726	0.777849	0.572188	1.95673	0.998731	1.17588
WGA	61.9965	97.5969	89.6748	57.7596	0.691348	1.68971	1.19053	0.886566			WGA	93.6604	19.2449	61.8567	23.0695	1.51415	0.834213	1.17418	0.576192		WGA	307.154	456.479	221.968	291.724	1.38378	1.56476	1.47427	0.196209		WGA	0.886566	0.576192	0.196209	1.19053	1.17418	1.47427	1.27966

## Sheet: Figure7
Lectin	PEG-enriched SARS-CoV-2 virions Replicate 1	PEG-enriched SARS-CoV-2 virions Replicate 2	PEG-enriched SARS-CoV-2 virions Replicate 3	Average for PEG-enriched SARS-CoV-2 virions	Dynabead virus enrichment kit enriched SARS-CoV-2 virions Replicate 1	Dynabead virus enrichment kit enriched SARS-CoV-2 virions Replicate 2	Dynabead virus enrichment kit enriched SARS-CoV-2 virions Replicate 3	Average for Dynabead virus enrichment kit enriched SARS-CoV-2 virions
AAA	0.406315	0.995442	0.390421	0.597392	2.91245	-1.31458	-1.00677	0.197031
AAL	103.656	148.036	105.873	119.188	97.8065	68.3589	48.7463	71.6372
ABA	-0.449644	7.79701	6.58746	4.64494	0.148622	-0.402236	0.863967	0.203451
ABL	2.20162	12.1636	6.64602	7.00376	1.88911	2.89913	2.18848	2.32557
ACG	14.7761	41.7124	21.6648	26.0511	10.9461	7.05918	2.13493	6.71339
ACL	1.25492	5.41757	4.29285	3.65511	0.865766	3.97411	1.79934	2.21307
AMA	157.89	412.735	317.776	296.134	131.98	149.142	99.1598	126.76
ASA	27.7259	236.656	150.488	138.29	17.5508	33.1367	129.206	59.9645
BANLEC	328.795	370.279	301.453	333.509	369.526	165.644	113.108	216.093
BC2L-A	20.9199	36.4502	44.6002	33.9901	1.95626	-0.743756	10.7246	3.97904
BC2LCN	8.14428	8.72585	5.11273	7.32762	0.602544	4.14324	-0.353441	1.46412
BPA	0.720248	1.18787	7.75872	3.22228	12.5496	4.18065	0.128524	5.61958
CA	8.28898	31.943	33.0846	24.4388	-0.35902	4.59373	10.6925	4.97573
CAA	1.63507	5.44348	9.88829	5.65561	-2.72264	11.5933	2.05638	3.64234
CALSEPA	9.80469	55.7559	54.3696	39.9767	1.40027	5.43452	11.6707	6.16849
CGL2	20.1424	21.6148	17.9753	19.9108	19.8365	8.0252	1.19242	9.68471
CNL	-0.0964691	13.0296	7.52447	6.81919	0.28829	3.21138	-0.339161	1.0535
Con A	31.1399	223.312	68.3023	107.585	32.4067	8.58789	29.9032	23.6326
CPA	2.71176	232.974	167.386	134.357	-0.829058	0.207623	4.00566	1.12808
CSA	12.4363	141.012	25.9079	59.7855	3.40129	-1.70815	6.27269	2.65528
DBA	14.987	133.611	23.1768	57.2584	-0.216665	3.24716	0.589068	1.20652
DISCOIDIN I	1.17643	0.518074	0.347829	0.680778	10.7017	-1.12756	0.671181	3.41509
DISCOIDIN II	49.8949	27.1212	52.7565	43.2575	54.8772	29.3946	8.13628	30.8027
DSA	43.4838	63.5196	58.075	55.0262	63.3486	104.033	27.0043	64.7954
ECA	0.278779	1.26188	1.22095	0.920537	-0.216665	8.63018	0.514096	2.97587
EEL	18.8278	14.8317	22.7455	18.8017	14.5506	6.15008	2.21347	7.63805
F17AG	0.42103	4.47024	0.954756	1.94867	10.7285	4.91085	0.285609	5.30833
GAL1	1.69393	8.06345	2.66373	4.14037	-0.713563	3.81473	0.146375	1.08251
GAL1-S	10.278	39.0961	32.4191	27.2644	6.86614	1.95588	1.36378	3.39527
GAL2	0.651575	56.2073	-0.205858	18.8843	-0.00447656	1.89409	0.392712	0.760774
GAL3	30.2815	47.9848	40.8788	39.715	12.9525	7.12586	12.4597	10.846
GAL3C-S	8.73536	60.7442	25.0934	31.5243	3.15955	3.052	5.04814	3.75323
GAL7-S	4.42613	6.60914	10.261	7.09875	1.55605	-0.763272	3.2845	1.35909
GAL9	1.81411	110.028	37.9773	49.9397	4.09157	-3.01731	1.49588	0.856713
GHA	3.24888	29.249	5.57591	12.6913	2.61162	-0.823445	4.11277	1.96698
GNA	189.649	190.089	264.563	214.767	236.046	203.242	118.153	185.814
GRFT	14.9625	14.0879	21.2708	16.7737	32.5947	15.8509	8.50043	18.982
GS-I	0.65648	0.00740106	0.401068	0.354983	-1.31521	7.98291	0.0392712	2.23566
GS-II	13.5204	20.8821	27.7447	20.7157	4.96719	10.18	0.032131	5.05978
HAA	-1.04808	0.669796	0.156168	-0.0740384	0.371554	10.5118	-0.621199	3.42072
HHA	47.3957	82.1073	73.1843	67.5625	81.331	75.3503	35.3155	63.9989
HMA	4.77685	25.1488	14.222	14.7159	6.71573	8.30492	0.0535517	5.02473
IRA	3.05022	2.00569	1.12512	2.06034	1.16122	2.12664	4.16275	2.48354
Jacalin	-1.75688	3.17135	0.576758	0.663743	3.63496	1.71519	0.96393	2.1047
LAL	2.93004	2.22402	17.1075	7.42053	0.838907	3.82937	-0.539087	1.3764
LBA	-1.492	0.177625	-0.477378	-0.597251	-1.73959	2.47467	1.78863	0.841235
LcH A	4.57084	121.492	100.661	75.5746	4.59384	-2.53918	-0.0892528	0.655136
LEA	46.9616	26.8251	65.997	46.5946	16.1917	28.2026	5.45156	16.6153
LENTIL	45.8408	105.165	100.012	83.6725	18.3754	4.80026	21.0565	14.744
Lotus	4.95344	3.15285	5.18727	4.43119	2.74055	15.1174	1.49588	6.45129
LPA	0.604976	-0.00740106	-0.0780841	0.173163	5.6521	9.57017	-0.0392712	5.061
LSL-N	21.2583	7.26784	7.0187	11.8483	5.23847	18.5034	0.803275	8.18171
MAA	15.117	165.514	135.4	105.343	11.6578	14.5092	23.4092	16.5254
MALECTIN	6.27294	13.8696	10.7614	10.3013	-0.240839	5.04258	7.92208	4.24127
MNA-G	4.2986	12.8889	7.19971	8.12908	7.94052	3.06827	6.02992	5.67957
MNA-M	23.6496	76.131	41.5017	47.0941	6.51428	-0.491682	8.90743	4.97668
MOA	81.3005	59.9116	119.497	86.9031	52.3256	19.2255	22.7595	31.4368
MPL	1.37019	1.70964	2.88201	1.98728	-1.28567	4.7775	0.892528	1.46145
NPA	107.639	486.52	398.039	330.733	118.134	99.3918	85.8005	101.109
ORYSATA	2.54008	142.607	138.333	94.4935	-1.91955	5.415	7.38656	3.62734
PA-IIL	11.6147	472.957	461.362	315.311	1.13705	5.46542	10.4747	5.69239
PA-IL	0.602523	4.48504	9.35057	4.81271	-2.37078	8.47405	5.57294	3.89207
PALa	33.5214	4.78108	15.9522	18.0849	8.96923	3.63584	9.0895	7.23152
PHA-E	71.1762	94.1785	133.552	99.6356	67.5521	41.9968	73.2373	60.9287
PHA-L	34.6765	126.902	109.898	90.4923	14.7413	9.64173	17.9291	14.104
PHA-P	24.5767	393.999	368.923	262.499	5.44528	3.89767	78.446	29.263
PNA	1.88769	8.57042	17.9487	9.46894	0.978575	6.44282	2.75613	3.39251
PPL	6.83704	0.307144	0.81101	2.65173	-0.283814	4.33189	0.289179	1.44575
PSA	10.7023	52.5512	25.5619	29.6051	8.92625	2.62104	1.98855	4.51195
PSL1A	3.52848	2.87901	0.26797	2.22515	3.84447	1.46149	-0.678321	1.54255
PTL-1	8.41652	102.767	56.3128	55.8322	1.82464	6.83963	3.47729	4.04719
PTL-2	103.72	435.66	453.104	330.828	23.022	9.26606	136.046	56.1114
PWA	0.742321	47.0374	14.4189	20.7329	2.3484	2.6682	1.27453	2.09704
RCA 120	339.035	372.684	451.204	387.641	215.381	86.5603	235.827	179.256
RCA 60	39.0078	52.1478	95.1082	62.088	4.52132	27.2024	23.3342	18.3527
RPA	6.04976	24.59	12.0924	14.2441	1.77898	4.53681	3.53441	3.2834
RS-FUC	29.428	43.3073	110.414	61.0499	18.8185	5.576	29.9996	18.1314
SAMB	0.796279	25.1192	198.983	74.9662	1.49965	-0.68521	19.7713	6.8619
SBA	7.01363	80.3422	264.579	117.312	-1.30715	1.99492	1.90644	0.864733
SHA	1.12002	1.06205	0.90684	1.02964	-0.455713	1.73146	0.499816	0.591853
SJA	0.484798	3.24536	5.24583	2.992	-2.22306	7.82354	0.282039	1.96084
SNA-I	8.67895	43.7069	25.0455	25.8105	-0.595382	7.3698	-0.0107103	2.25457
SNA-II	5.41698	15.2018	13.0613	11.2267	0.744899	0.893917	-0.938939	0.233292
SSA	6.658	1.26558	0.768419	2.89733	-0.168319	0.653226	1.39948	0.62813
STL	21.8789	308.502	154.699	161.693	21.2654	4.314	130.588	52.0557
TL	13.7828	292.708	244.034	183.508	-0.509432	5.05234	55.8472	20.1301
UDA	38.3113	57.4063	57.0901	50.9359	32.8526	41.4666	18.2861	30.8684
UEA I	0.842878	1.07685	1.46053	1.12675	0.170109	6.17936	-0.0606919	2.09626
UEA-II	-0.613968	12.7557	2.46142	4.86773	0.239943	3.35124	-0.32131	1.08996
VFA	0.602523	0.717903	1.14642	0.822281	-1.31521	-0.332305	-0.606919	-0.751479
VRA	0.521587	-0.725304	0.912164	0.236149	9.30228	2.00955	-0.103533	3.7361
VVA	7.62678	53.1544	45.7768	35.5193	9.7965	20.7119	8.11129	12.8732
VVA-M	1.10531	13.6438	12.119	8.95605	4.55892	3.96273	8.74677	5.75614
WFA	16.3188	67.5383	145.542	76.4663	5.87235	8.16018	4.3484	6.12697
WGA	-0.935259	7.95244	23.3631	10.1268	0.908741	14.3206	0.392712	5.20734

## Sheet: FigureS1
		FAM (ORF1ab gene of SARS-CoV-2)					HEX (E gene of SARS-CoV-2)
		Ct value technical replicate 1	Ct value technical replicate 2	Ct value technical replicate 3	p-value (t-test comparing un-enriched virus)		Ct value technical replicate 1	Ct value technical replicate 2	Ct value technical replicate 3	p-value (t-test comparing un-enriched virus)
Un-enriched virus	BR1	19.44	19.08	18.9			18.68	18.45	18.22
	BR 2	22.84	27.84	22.99			24.14	24.58	22.84
	BR 3	20.48	20.83	20.6			21.48	19.28	20.42
PEG-enriched virus	BR1	17.07	18.41	16.46	0.087		15.66	15.95	15.63	0.003
	BR 2	12.85	12.91	13.03	0.019		12.09	12.36	12.26	0.002
	BR 3	13.33	16.28	19.09	0.114		28.88	28.44	1.89	0.948
Dynabead kit-enriched virus	BR1	15.14	15.63	15.3	0.004		14.33	14.33	14.36	0.001
	BR 2	15.66	15.01	14.99	0.033		14.22	14.19	14.21	0.002
	BR 3	18.68	16	18.67	0.102		1.21	29.56	17.82	0.682

## Sheet: FigureS2b
Glycan ID	Glycan Text/Lectin Model	AAA	AAL	ABA	ACG	ACA/ACL	AMA	ASA	Banlec	BC2L-A	BC2LCN	BPA	CA	CAA	CGL2	CNL	ConA	CSA	DBA	DSA	ECA	EEL	GAL1	GAL3	GAL7	GAL9	GNA	GS-I	BSL/GS-II	HAA	HHA	Jacalin	LBA	LCA/LcH A	LEA	LPA	LTL/LOTUS	MAL-1/MAA	MNA-G	MNA-M	MOA	MPA/MPL	NPA	ORYSATA	PA-IIL	PA-IL	PHA-E	PHA-L	PNA
N_B_T2	Galb1-4GlcNAcb1-2Mana1-6(Galb1-4GlcNAcb1-2Mana1-3)Manb1-4GlcNAcb1-4GlcNAc?	0.0952203	-0.00834872	0	0.546996	0	0.358576	0	0	0.0117214	0	0.0767342	0.758574	0.848553	0	0	0.494102	0.025176	0	0	0.552497	0	0.930442	0.000382397	0	0	0.00383122	0	0	0	0.127149	0	0.019034	0.00217676	0	0	0	0.0337106	0.156344	0.106751	0	0.00329179	0.0540387	0.909909	0	0	0.359576	0.000318979	0
N_B_T1	Galb1-3GlcNAcb1-2Mana1-6(Galb1-3GlcNAcb1-2Mana1-3)Manb1-4GlcNAcb1-4GlcNAc?	0.0952203	-0.00834872	0	0.546996	0	0.358576	0.213511	0	0.100992	0	1	0.789569	0.948527	0	0	0.489715	0	0	0	0.00461231	0	0	0	0.0048392	0	0.0156791	0	0	0	0.127149	0	0.12072	0.0440631	0	0	0	0	0.156344	0.106751	0	0.00329179	0.1682	0.986203	0	0.446142	0	0	0
N_B_LeX	Galb1-4(Fuca1-3)GlcNAcb1-2Mana1-6(Galb1-4(Fuca1-3)GlcNAcb1-2Mana1-3)Manb1-4GlcNAcb1-4GlcNAc?	0.0952203	0.867149	0	0.546996	0	0.358576	0	0	0.0117214	0	0.298506	0.00834867	0.0294132	0	0	0.442527	0	0	0	0.00461231	0	0	0	0	0	0.0156791	0	0	0	0.127149	0	0.019034	0.00217676	0	0	0	-0.00212759	0.156344	0.106751	0	0.00329179	0.0540387	0.227355	0.0982208	0	0	0	0
N_B_LeY	Fuca1-4(Galb1-3)GlcNAcb1-2Mana1-6(Fuca1-4(Galb1-3)GlcNAcb1-2Mana1-3)Manb1-4GlcNAcb1-4GlcNAc?	0.0952203	0.574576	0	0.546996	0	0.358576	0.55338	0	0.100992	0	1	0.0131061	0.105815	0	0	0.489715	0	0	0	0.00461231	0	0	0	0	0	0.0156791	0	0	0	0.127149	0	0.12072	0.0440631	0	0	0	0	0.156344	0.106751	0	0.00329179	0.1682	0.986203	0.0777391	0.446142	0	0	0
N_B_LeA	Fuca1-2Galb1-4(Fuca1-3)GlcNAcb1-2Mana1-6(Fuca1-2Galb1-4(Fuca1-3)GlcNAcb1-2Mana1-3)Manb1-4GlcNAcb1-4GlcNAc?	0.0952203	0.838129	0	0.546996	0	0.0753751	0.0428297	0	0.0117214	0	0	0.0131061	0.105815	0	0	0.294833	0	0	0	0.00461231	0	0	0	0	0	0.0156791	0	0	0	0.127149	0	0.066638	0.00217676	0	0.0592566	0.192628	0	0.156344	0.106751	0	0.00329179	0.0540387	0.227355	0.0982208	0	0	0	0
N_B_LeB	Fuca1-2Galb1-3(Fuca1-4)GlcNAcb1-2Mana1-6(Fuca1-2Galb1-3(Fuca1-4)GlcNAcb1-2Mana1-3)Manb1-4GlcNAcb1-4GlcNAc?	0.0952203	0.547755	0	0.546996	0	0.358576	0.55338	0	0.100992	0	0	0.0131061	0.105815	0	0	0.489715	0	0	0	0.00461231	0	0	0	0	0	0.00383122	0	0	0	0.127149	0	0.019034	0.0440631	0	0.0592566	0	0	0.156344	0.106751	0	0.00329179	0.1682	0.145941	0.172979	0	0	0	0
N_B_BGH1	Fuca1-2Galb1-3GlcNAcb1-2Mana1-6(Fuca1-2Galb1-3GlcNAcb1-2Mana1-3)Manb1-4GlcNAcb1-4GlcNAc?	0.0952203	0.296256	0	0.546996	0	0.358576	0.27628	0	0.100992	0	0	0.397135	0.332145	0	0	0.489715	0	0	0	0.00461231	0	0	0	0.0048392	0	0.014793	0	0	0	0.127149	0	0.019034	0.0440631	0	0.0592566	0	0	0.156344	0.106751	0	0.00329179	0.1682	0.145941	0.172979	0	0	0	0
N_B_BGH2	Fuca1-2Galb1-4GlcNAcb1-2Mana1-6(Fuca1-2Galb1-4GlcNAcb1-2Mana1-3)Manb1-4GlcNAcb1-4GlcNAc?	0.0952203	0.628303	0	0.546996	0	0.0753751	0.0428297	0	0.0117214	0	0	0.128588	0.234772	0.0684455	0	0.40033	0	0	0	0.188608	0	0	0.000382397	0	0	0.014793	0	0	0	0.127149	0	0.066638	0.00217676	0	0.0592566	0	0	0.156344	0.106751	0	0.00329179	0.0540387	0.909909	0.326389	0	0	0	0
N_B_BGA1	GalNAca1-3(Fuca1-2)Galb1-3GlcNAcb1-2Mana1-6(GalNAca1-3(Fuca1-2)Galb1-3GlcNAcb1-2Mana1-3)Manb1-4GlcNAcb1-4GlcNAc?	0.0952203	-0.0123315	0	0.546996	0	0.358576	0.27628	0	0.100992	0	0	0.397135	0.332145	-0.00494243	0.880239	0.489715	-0.000233866	0.184081	0	0.00461231	0	0	0	0.00156524	0	0.014793	0	0	0.176502	0.127149	0	0.175499	0.0440631	0	0.0592566	0	0	0.156344	0.106751	0	0.00329179	0.1682	0.145941	0.087846	0	0	0	0
N_B_BGA2	GalNAca1-3(Fuca1-2)Galb1-4GlcNAcb1-2Mana1-6(GalNAca1-3(Fuca1-2)Galb1-4GlcNAcb1-2Mana1-3)Manb1-4GlcNAcb1-4GlcNAc?	0.0952203	0.0587359	0	0.546996	0	0.0753751	0.0428297	0	0.0117214	0	0	0.128588	0.234772	-0.00494243	0.880239	0.40033	-0.000233866	0.184081	0	0.188608	0	0	0.000382397	0	0	0.014793	0	0	0.0390336	0.127149	0	0.0576367	0.00217676	0	0.0592566	0	0	0.156344	0.106751	0	0.00329179	0.0540387	0.909909	0.087846	0	0	0	0
N_B_BGB1	Gala1-3(Fuca1-2)Galb1-3GlcNAcb1-2Mana1-6(Gala1-3(Fuca1-2)Galb1-3GlcNAcb1-2Mana1-3)Manb1-4GlcNAcb1-4GlcNAc?	0.0952203	-0.0123315	0	0.546996	0	0.358576	0.27628	0	0.100992	0	0	0.397135	0.332145	-0.00494243	0	0.489715	0	0	0	0.00461231	0.76067	0	0	0.0048392	0	0.014793	0	0	0	0.127149	0	0.019034	0.0440631	0	0.0592566	0	0	0.156344	0.106751	0.502953	0.00329179	0.1682	0.145941	0.0498039	0.0535384	0	0	0
N_B_BGB2	Gala1-3(Fuca1-2)Galb1-4GlcNAcb1-2Mana1-6(Gala1-3(Fuca1-2)Galb1-4GlcNAcb1-2Mana1-3)Manb1-4GlcNAcb1-4GlcNAc?	0.0952203	0.0587359	0	0.546996	0	0.0753751	0.0428297	0.155919	0.0117214	0	0	0.128588	0.234772	0.202403	0	0.40033	0	0	0	0.188608	1	0	0.000382397	0.00832247	0	0.014793	0	0	0	0.127149	0	0.066638	0.00217676	0	0.0592566	0	0	0.156344	0.106751	1	0.00329179	0.0540387	0.909909	0.0595036	0.0535384	0	0	0
N_B_BGA-LewY	GalNAca1-3(Fuca1-2)Galb1-3(Fuca1-4)GlcNAcb1-2Mana1-6(GalNAca1-3(Fuca1-2)Galb1-3(Fuca1-4)GlcNAcb1-2Mana1-3)Manb1-4GlcNAcb1-4GlcNAc?	0.0952203	0.0587359	0	0.546996	0	0.358576	0.55338	0	0.100992	0	0	0.0131061	0.105815	-0.00494243	0.880239	0.489715	-0.000233866	0.184081	0	0.00461231	0	0	0	0	0	0.014793	0	0	0.176502	0.127149	0	0.175499	0.0440631	0	0.0592566	0	0	0.156344	0.106751	0	0.00329179	0.1682	0.145941	0.087846	0	0	0	0
N_B_BGA-LewB	GalNAca1-3(Fuca1-2)Galb1-4(Fuca1-3)GlcNAcb1-2Mana1-6(GalNAca1-3(Fuca1-2)Galb1-4(Fuca1-3)GlcNAcb1-2Mana1-3)Manb1-4GlcNAcb1-4GlcNAc?	0.0952203	0.838129	0	0.546996	0	0.0753751	0.0428297	0	0.0117214	0	0	0.0131061	0.105815	-0.00494243	0.880239	0.294833	-0.000233866	0.184081	0	0.00461231	0	0	0	0	0	0.014793	0	0	0.0390336	0.127149	0	0.0576367	0.00217676	0	0.0592566	0.192628	0	0.156344	0.106751	0	0.00329179	0.0540387	0.227355	0.087846	0	0	0	0
N_B_BGB-LewY	Gala1-3(Fuca1-2)Galb1-3(Fuca1-4)GlcNAcb1-2Mana1-6(Gala1-3(Fuca1-2)Galb1-3(Fuca1-4)GlcNAcb1-2Mana1-3)Manb1-4GlcNAcb1-4GlcNAc?	0.0952203	0.0587359	0	0.546996	0	0.358576	0.55338	0	0.100992	0	0	0.0131061	0.105815	-0.00494243	0	0.489715	0	0	0	0.00461231	0.76067	0	0	0	0	0.014793	0	0	0	0.127149	0	0.019034	0.0440631	0	0.0592566	0	0	0.156344	0.106751	0.00044768	0.00329179	0.1682	0.145941	0.0498039	0.0535384	0	0	0
N_B_BGB-LewB	Gala1-3(Fuca1-2)Galb1-4(Fuca1-3)GlcNAcb1-2Mana1-6(Gala1-3(Fuca1-2)Galb1-4(Fuca1-3)GlcNAcb1-2Mana1-3)Manb1-4GlcNAcb1-4GlcNAc?	0.0952203	0.838129	0	0.546996	0	0.0753751	0.0428297	0	0.0117214	0	0	0.0131061	0.105815	0.202403	0	0.294833	0	0	0	0.00461231	-0.00896344	0	0	0	0	0.014793	0	0	0	0.127149	0	0.066638	0.00217676	0	0.0592566	0.192628	0	0.156344	0.106751	0.00044768	0.00329179	0.0540387	0.227355	0.0498039	0.0535384	0	0	0
N_B_a3NAC-T2	Neu5Aca2-3Galb1-4GlcNAcb1-2Mana1-6(Neu5Aca2-3Galb1-4GlcNAcb1-2Mana1-3)Manb1-4GlcNAcb1-4GlcNAc?	0.0952203	-0.00834872	0	0.546996	0	0.0753751	0	0.253625	0.0117214	0	0	0.00834867	0.0294132	0	0	0.559656	0	0	0	-0.00193494	0	0.930442	0.000382397	0	0	-0.0189707	0	0	0	0.127149	0	0.019034	0.00217676	0	0	0	0.430146	0.156344	0.106751	0	0.00329179	0.0540387	0.909909	0	0	0.359576	0.000318979	0
N_B_a6NAC-T2	Neu5Aca2-6Galb1-4GlcNAcb1-2Mana1-6(Neu5Aca2-6Galb1-4GlcNAcb1-2Mana1-3)Manb1-4GlcNAcb1-4GlcNAc?	0.0952203	-0.00834872	0	0.0715595	0	0.0753751	0	0	0.0117214	0	0	0.535007	0.55024	0	0	0.559656	0	0	0	-0.00193494	0	0	0	0	0	-0.0189707	0	0	0	0.127149	0	0.019034	0.00217676	0	0	0	0	0.156344	0.106751	0	0.00329179	0.0540387	1	0	0	0	0	0
N_B_a3NAC-LeX	Neu5Aca2-3Galb1-4(Fuca1-3)GlcNAcb1-2Mana1-6(Neu5Aca2-3Galb1-4(Fuca1-3)GlcNAcb1-2Mana1-3)Manb1-4GlcNAcb1-4GlcNAc?	0.0952203	0.838129	0	0.546996	0	0.0753751	0	0.253625	0.0117214	0	0	0.00834867	0.0294132	0	0	0.559656	0	0	0	0.00461231	0	0	0	0	0	-0.0189707	0	0	0	0.127149	0	0.019034	0.00217676	0	0	-0.047063	0	0.156344	0.106751	0	0.00329179	0.0540387	0.227355	0.0982208	0	0	0	0
N_B_a3NAC-LeA	Neu5Aca2-3Galb1-3(Fuca1-4)GlcNAcb1-2Mana1-6(Neu5Aca2-3Galb1-3(Fuca1-4)GlcNAcb1-2Mana1-3)Manb1-4GlcNAcb1-4GlcNAc?	0.0952203	0.558742	0	0.546996	0	0.358576	0.55338	0	0.100992	0	0	0.0131061	0.105815	0	0	0.489715	0	0	0	0.00461231	0	0	0	0	0	0.014793	0	0	0	0.127149	0	0.12072	0.0440631	0	0	0	0	0.156344	0.106751	0	0.00329179	0.1682	0.207874	0.0777391	0	0	0	0
N_B_a3NAC-T1	Neu5Aca2-3Galb1-3GlcNAcb1-2Mana1-6(Neu5Aca2-3Galb1-3GlcNAcb1-2Mana1-3)Manb1-4GlcNAcb1-4GlcNAc?	0.0952203	-0.00834872	0	0.546996	0	0.358576	0	0	0.100992	0	0	0.397135	0.332145	0	0	0.489715	0	0	0	0.00461231	0	0	0	-0.000963946	0	0.014793	0	0	0	0.127149	0	0.12072	0.0440631	0	0	0	0	0.156344	0.106751	0	0.00329179	0.1682	0.207874	0	0	0	0	0
N_B_a3NGC-T2	Neu5Gca2-3Galb1-4GlcNAcb1-2Mana1-6(Neu5Gca2-3Galb1-4GlcNAcb1-2Mana1-3)Manb1-4GlcNAcb1-4GlcNAc?	0.0952203	-0.00834872	0	0.546996	0	0.358576	0	0.253625	0.0117214	0	0	0.00834867	0.0294132	0	0	0.526003	0	0	0	0.000206047	0	0.930442	0.000382397	0	0	0.014793	0	0	0	0.127149	0	0.019034	0.00217676	0	0	0	0.430146	0.156344	0.106751	0	0.00329179	0.0540387	0.909909	0	0	0.359576	0.000318979	0
N_B_a6NGC-T2	Neu5Gca2-6Galb1-4GlcNAcb1-2Mana1-6(Neu5Gca2-6Galb1-4GlcNAcb1-2Mana1-3)Manb1-4GlcNAcb1-4GlcNAc?	0.0952203	-0.00834872	0	0.0715595	0	0.358576	0	0	0.0117214	0	0	0.535007	0.55024	0	0	0.526003	0	0	0	0.000206047	0	0	0	0	0	0.00383122	0	0	0	0.127149	0	0.019034	0.00217676	0	0	0	0.121657	0.156344	0.106751	0	0.00329179	0.0540387	1	0	0	0	0	0
N_B_a3NGC-LeX	Neu5Gca2-3Galb1-4(Fuca1-3)GlcNAcb1-2Mana1-6(Neu5Gca2-3Galb1-4(Fuca1-3)GlcNAcb1-2Mana1-3)Manb1-4GlcNAcb1-4GlcNAc?	0.0952203	0.838129	0	0.546996	0	0.358576	0	0.253625	0.0117214	0	0	0.00834867	0.0294132	0	0	0.442527	0	0	0	0.00461231	0	0	0	0	0	0.014793	0	0	0	0.127149	0	0.019034	0.00217676	0	0	0	0.121657	0.156344	0.106751	0	0.00329179	0.0540387	0.227355	0.0982208	0	0	0	0
N_B_a3NGC-LeA	Neu5Gca2-3Galb1-3(Fuca1-4)GlcNAcb1-2Mana1-6(Neu5Gca2-3Galb1-3(Fuca1-4)GlcNAcb1-2Mana1-3)Manb1-4GlcNAcb1-4GlcNAc?	0.0952203	0.558742	0	0.546996	0	0.358576	0.55338	0	0.100992	0	0	0.0131061	0.105815	0	0	0.489715	0	0	0	0.00461231	0	0	0	0	0	0.014793	0	0	0	0.127149	0	0.12072	0.0440631	0	0	0	0	0.156344	0.106751	0	0.00329179	0.1682	0.207874	0.0777391	0	0	0	0
N_B_a3NGC-T1	Neu5Gca2-3Galb1-3GlcNAcb1-2Mana1-6(Neu5Gca2-3Galb1-3GlcNAcb1-2Mana1-3)Manb1-4GlcNAcb1-4GlcNAc?	0.0952203	-0.00834872	0	0.546996	0	0.358576	0	0	0.100992	0	0	0.397135	0.332145	0	0	0.489715	0	0	0	0.00461231	0	0	0	-0.000963946	0	0.014793	0	0	0	0.127149	0	0.12072	0.0440631	0	0	0	0	0.156344	0.106751	0	0.00329179	0.1682	0.207874	0	0	0	0	0
N_B_NAC-NAC-T2	Neu5Aca2-8Neu5Aca2-3Galb1-4GlcNAcb1-2Mana1-6(Neu5Aca2-8Neu5Aca2-3Galb1-4GlcNAcb1-2Mana1-3)Manb1-4GlcNAcb1-4GlcNAc?	0.0952203	-0.00834872	0	0.546996	0	0.0753751	0	0.253625	0.0117214	0	0	0.00834867	0.0294132	0	0	0.559656	0	0	0	-0.00193494	0	0.930442	0.000382397	0	0	-0.0189707	0	0	0	0.127149	0	0.019034	0.00217676	0	0	0	0.430146	0.156344	0.106751	0	0.00329179	0.0540387	0.909909	0	0	0.359576	0.000318979	0
N_B_NGC-NAC-T2	Neu5Gca2-8Neu5Aca2-3Galb1-4GlcNAcb1-2Mana1-6(Neu5Gca2-8Neu5Aca2-3Galb1-4GlcNAcb1-2Mana1-3)Manb1-4GlcNAcb1-4GlcNAc?	0.0952203	-0.00834872	0	0.546996	0	0.0753751	0	0.253625	0.0117214	0	0	0.00834867	0.0294132	0	0	0.559656	0	0	0	-0.00193494	0	0.930442	0.000382397	0	0	-0.0189707	0	0	0	0.127149	0	0.019034	0.00217676	0	0	0	0.430146	0.156344	0.106751	0	0.00329179	0.0540387	0.909909	0	0	0.359576	0.000318979	0
N_B_NAC-NGC-T2	Neu5Aca2-8Neu5Gca2-3Galb1-4GlcNAcb1-2Mana1-6(Neu5Aca2-8Neu5Gca2-3Galb1-4GlcNAcb1-2Mana1-3)Manb1-4GlcNAcb1-4GlcNAc?	0.0952203	-0.00834872	0	0.546996	0	0.358576	0	0.253625	0.0117214	0	0	0.00834867	0.0294132	0	0	0.526003	0	0	0	0.0167095	0	0.930442	0.000382397	0	0	0.014793	0	0	0	0.127149	0	0.019034	0.00217676	0	0	0	0.430146	0.156344	0.106751	0	0.00329179	0.0540387	0.909909	0	0	0.359576	0.000318979	0
N_B_NGC-NGC-T2	Neu5Gca2-8Neu5Gca2-3Galb1-4GlcNAcb1-2Mana1-6(Neu5Gca2-8Neu5Gca2-3Galb1-4GlcNAcb1-2Mana1-3)Manb1-4GlcNAcb1-4GlcNAc?	0.0952203	-0.00834872	0	0.546996	0	0.358576	0	0.253625	0.0117214	0	0	0.00834867	0.0294132	0	0	0.526003	0	0	0	0.000206047	0	0.930442	0.000382397	0	0	0.014793	0	0	0	0.127149	0	0.019034	0.00217676	0	0	0	0.430146	0.156344	0.106751	0	0.00329179	0.0540387	0.909909	0	0	0.359576	0.000318979	0
N_B_NAC-NAC-T1	Neu5Aca2-8Neu5Aca2-3Galb1-3GlcNAcb1-2Mana1-6(Neu5Aca2-8Neu5Aca2-3Galb1-3GlcNAcb1-2Mana1-3)Manb1-4GlcNAcb1-4GlcNAc?	0.0952203	-0.00834872	0	0.546996	0	0.358576	0	0	0.100992	0	0	0.397135	1	0	0	0.489715	0	0	0	0.00461231	0	0	0	0.0048392	0	0.014793	0	0	0	0.127149	0	0.12072	0.0440631	0	0	0	0	0.156344	0.106751	0	0.00329179	0.1682	0.207874	0	0	0	0	0
N_B_NGC-NAC-T1	Neu5Gca2-8Neu5Aca2-3Galb1-3GlcNAcb1-2Mana1-6(Neu5Gca2-8Neu5Aca2-3Galb1-3GlcNAcb1-2Mana1-3)Manb1-4GlcNAcb1-4GlcNAc?	0.0952203	-0.00834872	0	0.546996	0	0.358576	0	0	0.100992	0	0	0.397135	1	0	0	0.489715	0	0	0	0.00461231	0	0	0	0.0048392	0	0.014793	0	0	0	0.127149	0	0.12072	0.0440631	0	0	0	0	0.156344	0.106751	0	0.00329179	0.1682	0.207874	0	0	0	0	0
N_B_NAC-NGC-T1	Neu5Aca2-8Neu5Gca2-3Galb1-3GlcNAcb1-2Mana1-6(Neu5Aca2-8Neu5Gca2-3Galb1-3GlcNAcb1-2Mana1-3)Manb1-4GlcNAcb1-4GlcNAc?	0.0952203	-0.00834872	0	0.546996	0	0.358576	0	0	0.100992	0	0	0.397135	1	0	0	0.489715	0	0	0	0.00461231	0	0	0	0.0048392	0	0.014793	0	0	0	0.127149	0	0.12072	0.0440631	0	0	0	0	0.156344	0.106751	0	0.00329179	0.1682	0.207874	0	0	0	0	0
N_B_NGC-NGC-T1	Neu5Gca2-8Neu5Gca2-3Galb1-3GlcNAcb1-2Mana1-6(Neu5Gca2-8Neu5Gca2-3Galb1-3GlcNAcb1-2Mana1-3)Manb1-4GlcNAcb1-4GlcNAc?	0.0952203	-0.00834872	0	0.546996	0	0.358576	0	0	0.100992	0	0	0.397135	1	0	0	0.489715	0	0	0	0.00461231	0	0	0	0.0048392	0	0.014793	0	0	0	0.127149	0	0.12072	0.0440631	0	0	0	0	0.156344	0.106751	0	0.00329179	0.1682	0.207874	0	0	0	0	0
N_B_T2-T2	Galb1-4GlcNAcb1-3Galb1-4GlcNAcb1-2Mana1-6(Galb1-4GlcNAcb1-3Galb1-4GlcNAcb1-2Mana1-3)Manb1-4GlcNAcb1-4GlcNAc?	0.0113123	-0.00834872	0.19104	0.546996	0.000470998	0.0157789	0.0628449	0	0.0117214	0	0.427973	0.00834867	0.0294132	0	0	0.656933	0.025176	0.00603862	0.0741688	0.637672	0	0.503011	0.471284	0.0168721	0.296427	0.014793	0	0	0	0.127149	-0.00230486	0.45381	0.00217676	-0.00951218	0.155339	0.749569	0.0615418	0.156344	0.106751	0	0.000283398	0.0540387	0.909909	0	0	0.359576	-0.000556902	0.220395
N_B_T1-T2	Galb1-3GlcNAcb1-3Galb1-4GlcNAcb1-2Mana1-6(Galb1-3GlcNAcb1-3Galb1-4GlcNAcb1-2Mana1-3)Manb1-4GlcNAcb1-4GlcNAc?	0.0952203	-0.00834872	0	0.546996	0	0.0753751	1	0	0.0117214	0	0.427973	0.00834867	0.0294132	0	0	0.771294	0	0	0	0.000206047	0	0.0452734	0.000382397	0.0168721	0.296427	0.014793	0	0	0	0.127149	0	0.019034	0.00217676	0	0.0592566	0	0	0.156344	0.106751	0	0.000283398	0.0540387	0.909909	0	0	0.359576	0.000318979	0
N_B_LeX-T2	Galb1-4(Fuca1-3)GlcNAcb1-3Galb1-4GlcNAcb1-2Mana1-6(Galb1-4(Fuca1-3)GlcNAcb1-3Galb1-4GlcNAcb1-2Mana1-3)Manb1-4GlcNAcb1-4GlcNAc?	0.0113123	0.700474	0	0.546996	0.000470998	0.0157789	0.0628449	0	0.0117214	0	0.427973	0.00834867	0.0294132	0.0968544	0	0.656933	0	0	0.0741688	0.00173771	0	0.503011	0.000382397	0.0168721	0	0.014793	0	0	0	0.127149	0	0.45381	0.00217676	0	0.155339	0.749569	-0.00212759	0.156344	0.106751	0	0.000283398	0.0540387	0.909909	0.0982208	0	0.359576	-0.000556902	0
N_B_LeY-T2	Fuca1-4(Galb1-3)GlcNAcb1-3Galb1-4GlcNAcb1-2Mana1-6(Fuca1-4(Galb1-3)GlcNAcb1-3Galb1-4GlcNAcb1-2Mana1-3)Manb1-4GlcNAcb1-4GlcNAc?	0.0952203	0.782694	0	0.546996	0	0.0753751	1	0	0.0117214	0	0.427973	0.00834867	0.0294132	0	0	0.771294	0	0	0	0.00173771	0	0.0452734	0.000382397	0.0168721	0.296427	0.014793	0	0	0	0.127149	0	0.019034	0.00217676	0	0.0592566	0	0	0.156344	0.106751	0	0.000283398	0.0540387	0.909909	0.594858	0	0.359576	0.000318979	0
N_B_LeA-T2	Fuca1-2Galb1-4(Fuca1-3)GlcNAcb1-3Galb1-4GlcNAcb1-2Mana1-6(Fuca1-2Galb1-4(Fuca1-3)GlcNAcb1-3Galb1-4GlcNAcb1-2Mana1-3)Manb1-4GlcNAcb1-4GlcNAc?	0.0952203	0.824938	0	0.546996	0	0.0753751	0	0	0.0117214	0	0	0.00834867	0.0294132	0	0	0.656933	0	0	0	0.33775	0	0.503011	0.000382397	0	0	0.014793	0	0	0	0.127149	0	0.019034	0.00217676	0	0.155339	0.0228821	0	0.156344	0.106751	0	0.00329179	0.0540387	0.909909	0.0982208	0	0.359576	0.0063989	0
N_B_LeB-T2	Fuca1-2Galb1-3(Fuca1-4)GlcNAcb1-3Galb1-4GlcNAcb1-2Mana1-6(Fuca1-2Galb1-3(Fuca1-4)GlcNAcb1-3Galb1-4GlcNAcb1-2Mana1-3)Manb1-4GlcNAcb1-4GlcNAc?	0.0952203	0.215661	0	0.546996	0	0.0753751	1	0	0.0117214	0	0	0.00834867	0.0294132	0	0	0.771294	0	0	0	0.33775	0	0.0452734	0.000382397	0	0	0.014793	0	0	0	0.127149	0	0.019034	0.00217676	0	0.0592566	0	0	0.156344	0.106751	0	0.00329179	0.0540387	0.909909	0.172979	0	0.359576	0.000318979	0
N_B_BGH1-T2	Fuca1-2Galb1-3GlcNAcb1-3Galb1-4GlcNAcb1-2Mana1-6(Fuca1-2Galb1-3GlcNAcb1-3Galb1-4GlcNAcb1-2Mana1-3)Manb1-4GlcNAcb1-4GlcNAc?	0.0952203	0.215661	0	0.546996	0	0.0753751	1	0	0.0117214	0	0	0.00834867	0.0294132	0	0	0.771294	0	0	0	0.33775	0	0.0452734	0.000382397	0.0048392	0	0.014793	0	0	0	0.127149	0	0.019034	0.00217676	0	0.0592566	0	0	0.156344	0.106751	0	0.00329179	0.0540387	0.909909	0.172979	0	0.359576	0.000318979	0
N_B_BGH2-T2	Fuca1-2Galb1-4GlcNAcb1-3Galb1-4GlcNAcb1-2Mana1-6(Fuca1-2Galb1-4GlcNAcb1-3Galb1-4GlcNAcb1-2Mana1-3)Manb1-4GlcNAcb1-4GlcNAc?	0.0952203	0.875297	0.19104	0.546996	0	0.0753751	0	0	0.0117214	0	0	0.00834867	0.0294132	0.0684455	0	0.656933	0.0347454	0	0.0201585	0.33775	0.407053	0.503011	0.000382397	1	0	0.014793	0	0	0	0.127149	0	0.019034	0.00217676	0	0.155339	0	0	0.156344	0.106751	0	0.00329179	0.0540387	0.909909	0.326389	0	0.359576	0.0063989	0
N_B_BGA1-T2	GalNAca1-3(Fuca1-2)Galb1-3GlcNAcb1-3Galb1-4GlcNAcb1-2Mana1-6(GalNAca1-3(Fuca1-2)Galb1-3GlcNAcb1-3Galb1-4GlcNAcb1-2Mana1-3)Manb1-4GlcNAcb1-4GlcNAc?	0.0952203	0.151865	0	0.546996	0	0.0753751	1	0	0.0117214	0	0	0.00834867	0.0294132	-0.00494243	0.880239	0.771294	-0.000233866	0.184081	0	0.33775	0	0.0452734	0.000382397	0.00156524	0	0.014793	0	0	0.364778	0.127149	0	0.175499	0.00217676	0	0.0592566	0	0	0.156344	0.106751	0	0.00329179	0.0540387	0.909909	0.087846	0	0.359576	0.000318979	0
N_B_BGA2-T2	GalNAca1-3(Fuca1-2)Galb1-4GlcNAcb1-3Galb1-4GlcNAcb1-2Mana1-6(GalNAca1-3(Fuca1-2)Galb1-4GlcNAcb1-3Galb1-4GlcNAcb1-2Mana1-3)Manb1-4GlcNAcb1-4GlcNAc?	0.0952203	0.151865	0.19104	0.546996	0	0.0753751	0	0	0.0117214	0	0	0.00834867	0.0294132	-0.00494243	0.880239	0.656933	-0.000233866	0.184081	0.0201585	0.33775	0	0.503011	0.000382397	0	0	0.014793	0	0	0.364778	0.127149	0	0.0576367	0.00217676	0	0.155339	0	0	0.156344	0.106751	0	0.00329179	0.0540387	0.909909	0.087846	0	0.359576	0.0063989	0
N_B_BGB1-T2	Gala1-3(Fuca1-2)Galb1-3GlcNAcb1-3Galb1-4GlcNAcb1-2Mana1-6(Gala1-3(Fuca1-2)Galb1-3GlcNAcb1-3Galb1-4GlcNAcb1-2Mana1-3)Manb1-4GlcNAcb1-4GlcNAc?	0.0952203	0.151865	0	0.546996	0	0.0753751	1	0	0.0117214	0	0	0.00834867	0.0294132	-0.00494243	0	0.771294	0	0	0	0.33775	0.76067	0.0452734	0.000382397	0.0048392	0	0.014793	0	0	0	0.127149	0	0.019034	0.00217676	0	0.0592566	0	0	0.156344	0.106751	0.502953	0.00329179	0.0540387	0.909909	0.0498039	0.0535384	0.359576	0.000318979	0
N_B_BGB2-T2	Gala1-3(Fuca1-2)Galb1-4GlcNAcb1-3Galb1-4GlcNAcb1-2Mana1-6(Gala1-3(Fuca1-2)Galb1-4GlcNAcb1-3Galb1-4GlcNAcb1-2Mana1-3)Manb1-4GlcNAcb1-4GlcNAc?	0.0952203	0.151865	0.19104	0.546996	0	0.0753751	0	0	0.0117214	0	0	0.00834867	0.0294132	0.202403	0	0.656933	0	0	0.0201585	0.33775	1	0.503011	0.000382397	0	0	0.014793	0	0	0	0.127149	0	0.019034	0.00217676	0	0.155339	0	0	0.156344	0.106751	1	0.00329179	0.0540387	0.909909	0.0595036	0.0535384	0.359576	0.0063989	0
N_B_BGA-LewY-T2	GalNAca1-3(Fuca1-2)Galb1-3(Fuca1-4)GlcNAcb1-3Galb1-4GlcNAcb1-2Mana1-6(GalNAca1-3(Fuca1-2)Galb1-3(Fuca1-4)GlcNAcb1-3Galb1-4GlcNAcb1-2Mana1-3)Manb1-4GlcNAcb1-4GlcNAc?	0.0952203	0.151865	0	0.546996	0	0.0753751	1	0	0.0117214	0	0	0.00834867	0.0294132	-0.00494243	0.880239	0.771294	-0.000233866	0.184081	0	0.33775	0	0.0452734	0.000382397	0	0	0.014793	0	0	0.364778	0.127149	0	0.175499	0.00217676	0	0.0592566	0	0	0.156344	0.106751	0	0.00329179	0.0540387	0.909909	0.087846	0	0.359576	0.000318979	0
N_B_BGA-LewB-T2	GalNAca1-3(Fuca1-2)Galb1-4(Fuca1-3)GlcNAcb1-3Galb1-4GlcNAcb1-2Mana1-6(GalNAca1-3(Fuca1-2)Galb1-4(Fuca1-3)GlcNAcb1-3Galb1-4GlcNAcb1-2Mana1-3)Manb1-4GlcNAcb1-4GlcNAc?	0.0952203	0.151865	0	0.546996	0	0.0753751	0	0	0.0117214	0	0	0.00834867	0.0294132	-0.00494243	0.880239	0.656933	-0.000233866	0.184081	0	0.33775	0	0.503011	0.000382397	0	0	0.014793	0	0	0.364778	0.127149	0	0.0576367	0.00217676	0	0.155339	0.0149704	0	0.156344	0.106751	0	0.00329179	0.0540387	0.909909	0.087846	0	0.359576	0.0063989	0
N_B_BGB-LewY-T2	Gala1-3(Fuca1-2)Galb1-3(Fuca1-4)GlcNAcb1-3Galb1-4GlcNAcb1-2Mana1-6(Gala1-3(Fuca1-2)Galb1-3(Fuca1-4)GlcNAcb1-3Galb1-4GlcNAcb1-2Mana1-3)Manb1-4GlcNAcb1-4GlcNAc?	0.0952203	0.151865	0	0.546996	0	0.0753751	1	0	0.0117214	0	0	0.00834867	0.0294132	-0.00494243	0	0.771294	0	0	0	0.33775	0.76067	0.0452734	0.000382397	0	0	0.014793	0	0	0	0.127149	0	0.019034	0.00217676	0	0.0592566	0	0	0.156344	0.106751	0.00044768	0.00329179	0.0540387	0.909909	0.0498039	0.0535384	0.359576	0.000318979	0
N_B_BGB-LewB-T2	Gala1-3(Fuca1-2)Galb1-4(Fuca1-3)GlcNAcb1-3Galb1-4GlcNAcb1-2Mana1-6(Gala1-3(Fuca1-2)Galb1-4(Fuca1-3)GlcNAcb1-3Galb1-4GlcNAcb1-2Mana1-3)Manb1-4GlcNAcb1-4GlcNAc?	0.0952203	0.151865	0	0.546996	0	0.0753751	0	0	0.0117214	0	0	0.00834867	0.0294132	0.202403	0	0.656933	0	0	0	0.33775	-0.00896344	0.503011	0.000382397	0	0	0.014793	0	0	0	0.127149	0	0.019034	0.00217676	0	0.155339	0.0149704	0	0.156344	0.106751	0.00044768	0.00329179	0.0540387	0.909909	0.0498039	0.0535384	0.359576	0.0063989	0
N_B_T2-LeX	Galb1-4GlcNAcb1-3Galb1-4(Fuca1-3)GlcNAcb1-2Mana1-6(Galb1-4GlcNAcb1-3Galb1-4(Fuca1-3)GlcNAcb1-2Mana1-3)Manb1-4GlcNAcb1-4GlcNAc?	0.0113123	0.867149	0.19104	0.546996	0	0.0157789	0.0628449	0	0.0117214	0	0.427973	0.00834867	0.0294132	0	0	0.442527	0.025176	0.00603862	0.0741688	0.533273	0	0.0830394	0	0.0168721	0	0.014793	0	0	0	0.127149	0	0.45381	0.00217676	0	0.155339	0.0149704	0.0615418	0.156344	0.106751	0	0.000283398	0.0540387	0.227355	0.0982208	0	0	0	0
N_B_T1-LeX	Galb1-3GlcNAcb1-3Galb1-4(Fuca1-3)GlcNAcb1-2Mana1-6(Galb1-3GlcNAcb1-3Galb1-4(Fuca1-3)GlcNAcb1-2Mana1-3)Manb1-4GlcNAcb1-4GlcNAc?	0.0952203	0.867149	0	0.546996	0	0.0753751	1	0	0.0117214	0	0.427973	0.00834867	0.0294132	0	0	0.442527	0	0	0	0.00461231	0	0	0	0.0168721	0	0.014793	0	0	0	0.127149	0	0.019034	0.00217676	0	0.0592566	0.0149704	0	0.156344	0.106751	0	0.00329179	0.0540387	0.227355	0.0982208	0	0	0	0
N_B_LeX-LeX	Galb1-4(Fuca1-3)GlcNAcb1-3Galb1-4(Fuca1-3)GlcNAcb1-2Mana1-6(Galb1-4(Fuca1-3)GlcNAcb1-3Galb1-4(Fuca1-3)GlcNAcb1-2Mana1-3)Manb1-4GlcNAcb1-4GlcNAc?	0.0113123	0.867149	0	0.546996	0.566231	0.0157789	0.0628449	0	0.0117214	0	0.427973	0.00834867	0.0294132	0.0416674	0	0.442527	0	0	0.0741688	0.00461231	0	0	0	0.0168721	0	0.014793	0	0	0	0.127149	0	0.45381	0.00217676	0	0.155339	0.0149704	-0.00212759	0.156344	0.106751	0	0.00329179	0.0540387	0.227355	0.287441	0	0	0	0
N_B_LeY-LeX	Fuca1-4(Galb1-3)GlcNAcb1-3Galb1-4(Fuca1-3)GlcNAcb1-2Mana1-6(Fuca1-4(Galb1-3)GlcNAcb1-3Galb1-4(Fuca1-3)GlcNAcb1-2Mana1-3)Manb1-4GlcNAcb1-4GlcNAc?	0.0952203	0.782694	0	0.546996	0	0.0753751	1	0	0.0117214	0	0.427973	0.00834867	0.0294132	0	0	0.442527	0	0	0	0.00461231	0	0	0	0.0168721	0	0.014793	0	0	0	0.127149	0	0.019034	0.00217676	0	0.0592566	0.0149704	0	0.156344	0.106751	0	0.00329179	0.0540387	0.227355	0.594858	0	0	0	0
N_B_LeA-LeX	Fuca1-2Galb1-4(Fuca1-3)GlcNAcb1-3Galb1-4(Fuca1-3)GlcNAcb1-2Mana1-6(Fuca1-2Galb1-4(Fuca1-3)GlcNAcb1-3Galb1-4(Fuca1-3)GlcNAcb1-2Mana1-3)Manb1-4GlcNAcb1-4GlcNAc?	0.0952203	0.824938	0	0.546996	0.566231	0.0753751	0	0	0.0117214	0	0	0.00834867	0.0294132	0	0	0.442527	0	0	0	0.00461231	0	0	0	0	0	0.014793	0	0	0	0.127149	0	0.019034	0.00217676	0	0.155339	0.0228821	0	0.156344	0.106751	0	0.00329179	0.0540387	0.227355	0.287441	0	0	0	0
N_B_LeB-LeX	Fuca1-2Galb1-3(Fuca1-4)GlcNAcb1-3Galb1-4(Fuca1-3)GlcNAcb1-2Mana1-6(Fuca1-2Galb1-3(Fuca1-4)GlcNAcb1-3Galb1-4(Fuca1-3)GlcNAcb1-2Mana1-3)Manb1-4GlcNAcb1-4GlcNAc?	0.0952203	0.215661	0	0.546996	0	0.0753751	1	0	0.0117214	0	0	0.00834867	0.0294132	0	0	0.442527	0	0	0	0.00461231	0	0	0	0	0	0.014793	0	0	0	0.127149	0	0.019034	0.00217676	0	0.0592566	0.0149704	0	0.156344	0.106751	0	0.00329179	0.0540387	0.227355	0.0982208	0	0	0	0
N_B_BGH1-LeX	Fuca1-2Galb1-3GlcNAcb1-3Galb1-4(Fuca1-3)GlcNAcb1-2Mana1-6(Fuca1-2Galb1-3GlcNAcb1-3Galb1-4(Fuca1-3)GlcNAcb1-2Mana1-3)Manb1-4GlcNAcb1-4GlcNAc?	0.0952203	0.215661	0	0.546996	0	0.0753751	1	0	0.0117214	0	0	0.00834867	0.0294132	0	0	0.442527	0	0	0	0.00461231	0	0	0	0.0048392	0	0.014793	0	0	0	0.127149	0	0.019034	0.00217676	0	0.0592566	0.0149704	0	0.156344	0.106751	0	0.00329179	0.0540387	0.227355	0.0982208	0	0	0	0
N_B_BGH2-LeX	Fuca1-2Galb1-4GlcNAcb1-3Galb1-4(Fuca1-3)GlcNAcb1-2Mana1-6(Fuca1-2Galb1-4GlcNAcb1-3Galb1-4(Fuca1-3)GlcNAcb1-2Mana1-3)Manb1-4GlcNAcb1-4GlcNAc?	0.0952203	0.875297	0.19104	0.546996	0	0.0753751	0	0	0.0117214	0	0	0.00834867	0.0294132	0.0684455	0	0.442527	0.0347454	0	0	0.00461231	0.407053	0	0	1	0	0.014793	0	0	0	0.127149	0	0.019034	0.00217676	0	0.155339	0.0149704	0	0.156344	0.106751	0	0.00329179	0.0540387	0.227355	0.326389	0	0	0	0
N_B_BGA1-LeX	GalNAca1-3(Fuca1-2)Galb1-3GlcNAcb1-3Galb1-4(Fuca1-3)GlcNAcb1-2Mana1-6(GalNAca1-3(Fuca1-2)Galb1-3GlcNAcb1-3Galb1-4(Fuca1-3)GlcNAcb1-2Mana1-3)Manb1-4GlcNAcb1-4GlcNAc?	0.0952203	0.151865	0	0.546996	0	0.0753751	1	0	0.0117214	0	0	0.00834867	0.0294132	-0.00494243	0.880239	0.442527	-0.000233866	0.184081	0	0.00461231	0	0	0	0.00156524	0	0.014793	0	0	0.364778	0.127149	0	0.175499	0.00217676	0	0.0592566	0.0149704	0	0.156344	0.106751	0	0.00329179	0.0540387	0.227355	0.087846	0	0	0	0
N_B_BGA2-LeX	GalNAca1-3(Fuca1-2)Galb1-4GlcNAcb1-3Galb1-4(Fuca1-3)GlcNAcb1-2Mana1-6(GalNAca1-3(Fuca1-2)Galb1-4GlcNAcb1-3Galb1-4(Fuca1-3)GlcNAcb1-2Mana1-3)Manb1-4GlcNAcb1-4GlcNAc?	0.0952203	0.151865	0.19104	0.546996	0	0.0753751	0	0	0.0117214	0	0	0.00834867	0.0294132	-0.00494243	0.880239	0.442527	-0.000233866	0.184081	0	0.00461231	0	0	0	0	0	0.014793	0	0	0.364778	0.127149	0	0.0576367	0.00217676	0	0.155339	0.0149704	0	0.156344	0.106751	0	0.00329179	0.0540387	0.227355	0.087846	0	0	0	0
N_B_BGB1-LeX	Gala1-3(Fuca1-2)Galb1-3GlcNAcb1-3Galb1-4(Fuca1-3)GlcNAcb1-2Mana1-6(Gala1-3(Fuca1-2)Galb1-3GlcNAcb1-3Galb1-4(Fuca1-3)GlcNAcb1-2Mana1-3)Manb1-4GlcNAcb1-4GlcNAc?	0.0952203	0.151865	0	0.546996	0	0.0753751	1	0	0.0117214	0	0	0.00834867	0.0294132	-0.00494243	0	0.442527	0	0	0	0.00461231	0.76067	0	0	0.0048392	0	0.014793	0	0	0	0.127149	0	0.019034	0.00217676	0	0.0592566	0.0149704	0	0.156344	0.106751	0.502953	0.00329179	0.0540387	0.227355	0.0498039	0.0535384	0	0	0
N_B_BGB2-LeX	Gala1-3(Fuca1-2)Galb1-4GlcNAcb1-3Galb1-4(Fuca1-3)GlcNAcb1-2Mana1-6(Gala1-3(Fuca1-2)Galb1-4GlcNAcb1-3Galb1-4(Fuca1-3)GlcNAcb1-2Mana1-3)Manb1-4GlcNAcb1-4GlcNAc?	0.0952203	0.151865	0.19104	0.546996	0	0.0753751	0	0	0.0117214	0	0	0.00834867	0.0294132	0.202403	0	0.442527	0	0	0	0.00461231	1	0	0	0	0	0.014793	0	0	0	0.127149	0	0.019034	0.00217676	0	0.155339	0.0149704	0	0.156344	0.106751	1	0.00329179	0.0540387	0.227355	0.0595036	0.0535384	0	0	0
N_B_BGA-LewY-LeX	GalNAca1-3(Fuca1-2)Galb1-3(Fuca1-4)GlcNAcb1-3Galb1-4(Fuca1-3)GlcNAcb1-2Mana1-6(GalNAca1-3(Fuca1-2)Galb1-3(Fuca1-4)GlcNAcb1-3Galb1-4(Fuca1-3)GlcNAcb1-2Mana1-3)Manb1-4GlcNAcb1-4GlcNAc?	0.0952203	0.151865	0	0.546996	0	0.0753751	1	0	0.0117214	0	0	0.00834867	0.0294132	-0.00494243	0.880239	0.442527	-0.000233866	0.184081	0	0.00461231	0	0	0	0	0	0.014793	0	0	0.364778	0.127149	0	0.175499	0.00217676	0	0.0592566	0.0149704	0	0.156344	0.106751	0	0.00329179	0.0540387	0.227355	0.087846	0	0	0	0
N_B_BGA-LewB-LeX	GalNAca1-3(Fuca1-2)Galb1-4(Fuca1-3)GlcNAcb1-3Galb1-4(Fuca1-3)GlcNAcb1-2Mana1-6(GalNAca1-3(Fuca1-2)Galb1-4(Fuca1-3)GlcNAcb1-3Galb1-4(Fuca1-3)GlcNAcb1-2Mana1-3)Manb1-4GlcNAcb1-4GlcNAc?	0.0952203	0.151865	0	0.546996	0.566231	0.0753751	0	0	0.0117214	0	0	0.00834867	0.0294132	-0.00494243	0.880239	0.442527	-0.000233866	0.184081	0	0.00461231	0	0	0	0	0	0.014793	0	0	0.364778	0.127149	0	0.0576367	0.00217676	0	0.155339	0.0149704	0	0.156344	0.106751	0	0.00329179	0.0540387	0.227355	0.087846	0	0	0	0
N_B_BGB-LewY-LeX	Gala1-3(Fuca1-2)Galb1-3(Fuca1-4)GlcNAcb1-3Galb1-4(Fuca1-3)GlcNAcb1-2Mana1-6(Gala1-3(Fuca1-2)Galb1-3(Fuca1-4)GlcNAcb1-3Galb1-4(Fuca1-3)GlcNAcb1-2Mana1-3)Manb1-4GlcNAcb1-4GlcNAc?	0.0952203	0.151865	0	0.546996	0	0.0753751	1	0	0.0117214	0	0	0.00834867	0.0294132	-0.00494243	0	0.442527	0	0	0	0.00461231	0.76067	0	0	0	0	0.014793	0	0	0	0.127149	0	0.019034	0.00217676	0	0.0592566	0.0149704	0	0.156344	0.106751	0.00044768	0.00329179	0.0540387	0.227355	0.0498039	0.0535384	0	0	0
N_B_BGB-LewB-LeX	Gala1-3(Fuca1-2)Galb1-4(Fuca1-3)GlcNAcb1-3Galb1-4(Fuca1-3)GlcNAcb1-2Mana1-6(Gala1-3(Fuca1-2)Galb1-4(Fuca1-3)GlcNAcb1-3Galb1-4(Fuca1-3)GlcNAcb1-2Mana1-3)Manb1-4GlcNAcb1-4GlcNAc?	0.0952203	0.151865	0	0.546996	0.566231	0.0753751	0	0	0.0117214	0	0	0.00834867	0.0294132	0.202403	0	0.442527	0	0	0	0.00461231	-0.00896344	0	0	0	0	0.014793	0	0	0	0.127149	0	0.019034	0.00217676	0	0.155339	0.0149704	0	0.156344	0.106751	0.00044768	0.00329179	0.0540387	0.227355	0.0498039	0.0535384	0	0	0
N_B_a3NAC-T2-T2	Neu5Aca2-3Galb1-4GlcNAcb1-3Galb1-4GlcNAcb1-2Mana1-6(Neu5Aca2-3Galb1-4GlcNAcb1-3Galb1-4GlcNAcb1-2Mana1-3)Manb1-4GlcNAcb1-4GlcNAc?	0.0113123	-0.00834872	0.19104	0.546996	0.000470998	0.0157789	0.0628449	0	0.0117214	0	0	0.00834867	0.0294132	0	0	0.656933	0	0	0.0741688	0.33775	0	0.503011	0.471284	0.0168721	0.296427	0.014793	0	0	0	0.127149	-0.00230486	0.45381	0.00217676	-0.00951218	0.155339	0.749569	0.809729	0.156344	0.106751	0	0.000283398	0.0540387	0.909909	0	0	0.196764	0.0063989	0.220395
N_B_a6NAC-T2-T2	Neu5Aca2-6Galb1-4GlcNAcb1-3Galb1-4GlcNAcb1-2Mana1-6(Neu5Aca2-6Galb1-4GlcNAcb1-3Galb1-4GlcNAcb1-2Mana1-3)Manb1-4GlcNAcb1-4GlcNAc?	0.0113123	-0.00834872	0.19104	0.546996	0.000470998	0.0157789	0.0628449	0	0.0117214	0	0	0.00834867	0.0294132	0	0	0.656933	0	0	0.0201585	0.0167095	0	0.0452734	0.000382397	0	0	0.014793	0	0	0	0.127149	-0.00230486	0.019034	0.00217676	0	0.155339	0.24889	0	0.156344	0.106751	0	0.000283398	0.0540387	0.909909	0	0	0.196764	-0.000556902	0.127255
N_B_a3NAC-LeX-T2	Neu5Aca2-3Galb1-4(Fuca1-3)GlcNAcb1-3Galb1-4GlcNAcb1-2Mana1-6(Neu5Aca2-3Galb1-4(Fuca1-3)GlcNAcb1-3Galb1-4GlcNAcb1-2Mana1-3)Manb1-4GlcNAcb1-4GlcNAc?	0.0113123	0.829418	0	0.546996	0.000470998	0.0157789	0.0628449	0	0.0117214	0	0	0.00834867	0.0294132	0.0968544	0	0.656933	0	0	0.0741688	0.33775	0	0.503011	0.000382397	0.0168721	0	0.014793	0	0	0	0.127149	0	0.45381	0.00217676	0	0.155339	0.749569	0	0.156344	0.106751	0	0.000283398	0.0540387	0.909909	0.0982208	0	0.196764	0.0063989	0
N_B_a3NAC-LeA-T2	Neu5Aca2-3Galb1-3(Fuca1-4)GlcNAcb1-3Galb1-4GlcNAcb1-2Mana1-6(Neu5Aca2-3Galb1-3(Fuca1-4)GlcNAcb1-3Galb1-4GlcNAcb1-2Mana1-3)Manb1-4GlcNAcb1-4GlcNAc?	0.0952203	0.782694	0	0.546996	0	0.0753751	1	0	0.0117214	0	0	0.00834867	0.0294132	0	0	0.771294	0	0	0	0.33775	0	0.0452734	0.000382397	0.0168721	0.296427	0.014793	0	0	0	0.127149	0	0.019034	0.00217676	0	0.0592566	0	0	0.156344	0.106751	0	0.000283398	0.0540387	0.909909	1	0	0.196764	0.000318979	0
N_B_a3NAC-T1-T2	Neu5Aca2-3Galb1-3GlcNAcb1-3Galb1-4GlcNAcb1-2Mana1-6(Neu5Aca2-3Galb1-3GlcNAcb1-3Galb1-4GlcNAcb1-2Mana1-3)Manb1-4GlcNAcb1-4GlcNAc?	0.0952203	-0.00834872	0	0.546996	0	0.0753751	1	0	0.0117214	0	0	0.00834867	0.0294132	0	0	0.771294	0	0	0	0.33775	0	0.0452734	0.000382397	0.0168721	0.296427	0.014793	0	0	0	0.127149	0	0.019034	0.00217676	0	0.0592566	0	0	0.156344	0.106751	0	0.000283398	0.0540387	0.909909	0	0	0.196764	0.000318979	0
N_B_a3NGC-T2-T2	Neu5Gca2-3Galb1-4GlcNAcb1-3Galb1-4GlcNAcb1-2Mana1-6(Neu5Gca2-3Galb1-4GlcNAcb1-3Galb1-4GlcNAcb1-2Mana1-3)Manb1-4GlcNAcb1-4GlcNAc?	0.0113123	-0.00834872	0.19104	0.546996	0.000470998	0.0157789	0.0628449	0	0.0117214	0	0	0.00834867	0.0294132	0	0	0.656933	0	0	0.0741688	0.33775	0	0.503011	0.471284	0.0168721	0.296427	0.014793	0	0	0	0.127149	-0.00230486	0.45381	0.00217676	0.0127053	0.155339	0.749569	0.809729	0.156344	0.106751	0	0.000283398	0.0540387	0.909909	0	0	0.359576	0.0063989	0.220395
N_B_a6NGC-T2-T2	Neu5Gca2-6Galb1-4GlcNAcb1-3Galb1-4GlcNAcb1-2Mana1-6(Neu5Gca2-6Galb1-4GlcNAcb1-3Galb1-4GlcNAcb1-2Mana1-3)Manb1-4GlcNAcb1-4GlcNAc?	0.0113123	-0.00834872	0.19104	0.546996	0.000470998	0.0157789	0.0628449	0	0.0117214	0	0	0.00834867	0.0294132	0	0	0.656933	0	0	0.0201585	0.00173771	0	0.0452734	0.000382397	0	0	0.014793	0	0	0	0.127149	-0.00230486	0.019034	0.00217676	0	0.155339	0.24889	0.121657	0.156344	0.106751	0	0.000283398	0.0540387	0.909909	0	0	0.359576	-0.000556902	0.127255
N_B_a3NGC-LeX-T2	Neu5Gca2-3Galb1-4(Fuca1-3)GlcNAcb1-3Galb1-4GlcNAcb1-2Mana1-6(Neu5Gca2-3Galb1-4(Fuca1-3)GlcNAcb1-3Galb1-4GlcNAcb1-2Mana1-3)Manb1-4GlcNAcb1-4GlcNAc?	0.0113123	0.829418	0	0.546996	0.000470998	0.0157789	0.0628449	0	0.0117214	0	0	0.00834867	0.0294132	0.0968544	0	0.656933	0	0	0.0741688	0.33775	0	0.503011	0.000382397	0.0168721	0	0.014793	0	0	0	0.127149	0	0.45381	0.00217676	0	0.155339	0.749569	0.121657	0.156344	0.106751	0	0.000283398	0.0540387	0.909909	0.0982208	0	0.359576	0.0063989	0
N_B_a3NGC-LeA-T2	Neu5Gca2-3Galb1-3(Fuca1-4)GlcNAcb1-3Galb1-4GlcNAcb1-2Mana1-6(Neu5Gca2-3Galb1-3(Fuca1-4)GlcNAcb1-3Galb1-4GlcNAcb1-2Mana1-3)Manb1-4GlcNAcb1-4GlcNAc?	0.0952203	0.782694	0	0.546996	0	0.0753751	1	0	0.0117214	0	0	0.00834867	0.0294132	0	0	0.771294	0	0	0	0.33775	0	0.0452734	0.000382397	0.0168721	0.296427	0.014793	0	0	0	0.127149	0	0.019034	0.00217676	0	0.0592566	0	0	0.156344	0.106751	0	0.000283398	0.0540387	0.909909	0.594858	0	0.359576	0.000318979	0
N_B_a3NGC-T1-T2	Neu5Gca2-3Galb1-3GlcNAcb1-3Galb1-4GlcNAcb1-2Mana1-6(Neu5Gca2-3Galb1-3GlcNAcb1-3Galb1-4GlcNAcb1-2Mana1-3)Manb1-4GlcNAcb1-4GlcNAc?	0.0952203	-0.00834872	0	0.546996	0	0.0753751	1	0	0.0117214	0	0	0.00834867	0.0294132	0	0	0.771294	0	0	0	0.33775	0	0.0452734	0.000382397	0.0168721	0.296427	0.014793	0	0	0	0.127149	0	0.019034	0.00217676	0	0.0592566	0	0	0.156344	0.106751	0	0.000283398	0.0540387	0.909909	0	0	0.359576	0.000318979	0
N_B_NAC-NAC-T2-T2	Neu5Aca2-8Neu5Aca2-3Galb1-4GlcNAcb1-3Galb1-4GlcNAcb1-2Mana1-6(Neu5Aca2-8Neu5Aca2-3Galb1-4GlcNAcb1-3Galb1-4GlcNAcb1-2Mana1-3)Manb1-4GlcNAcb1-4GlcNAc?	0.0113123	-0.00834872	0.19104	0.546996	0.000470998	0.0157789	0.0628449	0	0.0117214	0	0	0.00834867	0.0294132	0	0	0.656933	0	0	0.0741688	0.0167095	0	0.503011	0.471284	0.0168721	0.296427	0.014793	0	0	0	0.127149	-0.00230486	0.45381	0.00217676	-0.00951218	0.155339	0.749569	0.635298	0.156344	0.106751	0	0.000283398	0.0540387	0.909909	0	0	0.196764	0.0063989	0.220395
N_B_NGC-NAC-T2-T2	Neu5Gca2-8Neu5Aca2-3Galb1-4GlcNAcb1-3Galb1-4GlcNAcb1-2Mana1-6(Neu5Gca2-8Neu5Aca2-3Galb1-4GlcNAcb1-3Galb1-4GlcNAcb1-2Mana1-3)Manb1-4GlcNAcb1-4GlcNAc?	0.0113123	-0.00834872	0.19104	0.546996	0.000470998	0.0157789	0.0628449	0	0.0117214	0	0	0.00834867	0.0294132	0	0	0.656933	0	0	0.0741688	0.0167095	0	0.503011	0.471284	0.0168721	0.296427	0.014793	0	0	0	0.127149	-0.00230486	0.45381	0.00217676	-0.00951218	0.155339	0.749569	0.44669	0.156344	0.106751	0	0.000283398	0.0540387	0.909909	0	0	0.196764	0.0063989	0.220395
N_B_NAC-NGC-T2-T2	Neu5Aca2-8Neu5Gca2-3Galb1-4GlcNAcb1-3Galb1-4GlcNAcb1-2Mana1-6(Neu5Aca2-8Neu5Gca2-3Galb1-4GlcNAcb1-3Galb1-4GlcNAcb1-2Mana1-3)Manb1-4GlcNAcb1-4GlcNAc?	0.0113123	-0.00834872	0.19104	0.546996	0.000470998	0.0157789	0.0628449	0	0.0117214	0	0	0.00834867	0.0294132	0	0	0.656933	0	0	0.0741688	0.0167095	0	0.503011	0.471284	0.0168721	0.296427	0.014793	0	0	0	0.127149	-0.00230486	0.45381	0.00217676	0.0127053	0.155339	0.749569	0.635298	0.156344	0.106751	0	0.000283398	0.0540387	0.909909	0	0	0.359576	0.0063989	0.220395
N_B_NGC-NGC-T2-T2	Neu5Gca2-8Neu5Gca2-3Galb1-4GlcNAcb1-3Galb1-4GlcNAcb1-2Mana1-6(Neu5Gca2-8Neu5Gca2-3Galb1-4GlcNAcb1-3Galb1-4GlcNAcb1-2Mana1-3)Manb1-4GlcNAcb1-4GlcNAc?	0.0113123	-0.00834872	0.19104	0.546996	0.000470998	0.0157789	0.0628449	0	0.0117214	0	0	0.00834867	0.0294132	0	0	0.656933	0	0	0.0741688	0.00173771	0	0.503011	0.471284	0.0168721	0.296427	0.014793	0	0	0	0.127149	-0.00230486	0.45381	0.00217676	0.0127053	0.155339	0.749569	0.44669	0.156344	0.106751	0	0.000283398	0.0540387	0.909909	0	0	0.359576	0.0063989	0.220395
N_B_NAC-NAC-T1-T2	Neu5Aca2-8Neu5Aca2-3Galb1-3GlcNAcb1-3Galb1-4GlcNAcb1-2Mana1-6(Neu5Aca2-8Neu5Aca2-3Galb1-3GlcNAcb1-3Galb1-4GlcNAcb1-2Mana1-3)Manb1-4GlcNAcb1-4GlcNAc?	0.0952203	-0.00834872	0	0.546996	0	0.0753751	1	0	0.0117214	0	0	0.00834867	0.0294132	0	0	0.771294	0	0	0	0.0167095	0	0.0452734	0.000382397	0.0168721	0.296427	0.014793	0	0	0	0.127149	0	0.019034	0.00217676	0	0.0592566	0	0	0.156344	0.106751	0	0.000283398	0.0540387	0.909909	0	0	0.196764	0.000318979	0
N_B_NGC-NAC-T1-T2	Neu5Gca2-8Neu5Aca2-3Galb1-3GlcNAcb1-3Galb1-4GlcNAcb1-2Mana1-6(Neu5Gca2-8Neu5Aca2-3Galb1-3GlcNAcb1-3Galb1-4GlcNAcb1-2Mana1-3)Manb1-4GlcNAcb1-4GlcNAc?	0.0952203	-0.00834872	0	0.546996	0	0.0753751	1	0	0.0117214	0	0	0.00834867	0.0294132	0	0	0.771294	0	0	0	0.0167095	0	0.0452734	0.000382397	0.0168721	0.296427	0.014793	0	0	0	0.127149	0	0.019034	0.00217676	0	0.0592566	0	0	0.156344	0.106751	0	0.000283398	0.0540387	0.909909	0	0	0.196764	0.000318979	0
N_B_NAC-NGC-T1-T2	Neu5Aca2-8Neu5Gca2-3Galb1-3GlcNAcb1-3Galb1-4GlcNAcb1-2Mana1-6(Neu5Aca2-8Neu5Gca2-3Galb1-3GlcNAcb1-3Galb1-4GlcNAcb1-2Mana1-3)Manb1-4GlcNAcb1-4GlcNAc?	0.0952203	-0.00834872	0	0.546996	0	0.0753751	1	0	0.0117214	0	0	0.00834867	0.0294132	0	0	0.771294	0	0	0	0.0167095	0	0.0452734	0.000382397	0.0168721	0.296427	0.014793	0	0	0	0.127149	0	0.019034	0.00217676	0	0.0592566	0	0	0.156344	0.106751	0	0.000283398	0.0540387	0.909909	0	0	0.359576	0.000318979	0
N_B_NGC-NGC-T1-T2	Neu5Gca2-8Neu5Gca2-3Galb1-3GlcNAcb1-3Galb1-4GlcNAcb1-2Mana1-6(Neu5Gca2-8Neu5Gca2-3Galb1-3GlcNAcb1-3Galb1-4GlcNAcb1-2Mana1-3)Manb1-4GlcNAcb1-4GlcNAc?	0.0952203	-0.00834872	0	0.546996	0	0.0753751	1	0	0.0117214	0	0	0.00834867	0.0294132	0	0	0.771294	0	0	0	0.000206047	0	0.0452734	0.000382397	0.0168721	0.296427	0.014793	0	0	0	0.127149	0	0.019034	0.00217676	0	0.0592566	0	0	0.156344	0.106751	0	0.000283398	0.0540387	0.909909	0	0	0.359576	0.000318979	0
N_B_a3NAC-T2	Neu5Aca2-3Galb1-4GlcNAcb1-3Galb1-4(Fuca1-3)GlcNAcb1-2Mana1-6(Neu5Aca2-3Galb1-4GlcNAcb1-3Galb1-4(Fuca1-3)GlcNAcb1-2Mana1-3)Manb1-4GlcNAcb1-4GlcNAc?	0.0113123	0.867149	0.19104	0.546996	0	0.0157789	0.0628449	0	0.0117214	0	0	0.00834867	0.0294132	0	0	0.442527	0	0	0.0741688	0.00461231	0	0.0830394	0	0.0168721	0	0.014793	0	0	0	0.127149	0	0.45381	0.00217676	0	0.155339	0.0149704	0.809729	0.156344	0.106751	0	0.000283398	0.0540387	0.227355	0.0982208	0	0	0	0
N_B_a6NAC-T2-LeX	Neu5Aca2-6Galb1-4GlcNAcb1-3Galb1-4(Fuca1-3)GlcNAcb1-2Mana1-6(Neu5Aca2-6Galb1-4GlcNAcb1-3Galb1-4(Fuca1-3)GlcNAcb1-2Mana1-3)Manb1-4GlcNAcb1-4GlcNAc?	0.0113123	0.867149	0.19104	0.546996	0	0.0157789	0.0628449	0	0.0117214	0	0	0.00834867	0.0294132	0	0	0.442527	0	0	0	0.00461231	0	0	0	0	0	0.014793	0	0	0	0.127149	0	0.019034	0.00217676	0	0.155339	0.0149704	0	0.156344	0.106751	0	0.000283398	0.0540387	0.227355	0.0982208	0	0	0	0
N_B_a3NAC-LeX-LeX	Neu5Aca2-3Galb1-4(Fuca1-3)GlcNAcb1-3Galb1-4(Fuca1-3)GlcNAcb1-2Mana1-6(Neu5Aca2-3Galb1-4(Fuca1-3)GlcNAcb1-3Galb1-4(Fuca1-3)GlcNAcb1-2Mana1-3)Manb1-4GlcNAcb1-4GlcNAc?	0.0113123	0.867149	0	0.546996	0.566231	0.0157789	0.0628449	0	0.0117214	0	0	0.00834867	0.0294132	0.0416674	0	0.442527	0	0	0.0741688	0.00461231	0	0	0	0.0168721	0	0.014793	0	0	0	0.127149	0	0.45381	0.00217676	0	0.155339	-0.047063	0	0.156344	0.106751	0	0.00329179	0.0540387	0.227355	0.287441	0	0	0	0
N_B_a3NAC-LeA-LeX	Neu5Aca2-3Galb1-3(Fuca1-4)GlcNAcb1-3Galb1-4(Fuca1-3)GlcNAcb1-2Mana1-6(Neu5Aca2-3Galb1-3(Fuca1-4)GlcNAcb1-3Galb1-4(Fuca1-3)GlcNAcb1-2Mana1-3)Manb1-4GlcNAcb1-4GlcNAc?	0.0952203	0.782694	0	0.546996	0	0.0753751	1	0	0.0117214	0	0	0.00834867	0.0294132	0	0	0.442527	0	0	0	0.00461231	0	0	0	0.0168721	0	0.014793	0	0	0	0.127149	0	0.019034	0.00217676	0	0.0592566	0.0149704	0	0.156344	0.106751	0	0.00329179	0.0540387	0.227355	1	0	0	0	0
N_B_a3NAC-T1-LeX	Neu5Aca2-3Galb1-3GlcNAcb1-3Galb1-4(Fuca1-3)GlcNAcb1-2Mana1-6(Neu5Aca2-3Galb1-3GlcNAcb1-3Galb1-4(Fuca1-3)GlcNAcb1-2Mana1-3)Manb1-4GlcNAcb1-4GlcNAc?	0.0952203	0.867149	0	0.546996	0	0.0753751	1	0	0.0117214	0	0	0.00834867	0.0294132	0	0	0.442527	0	0	0	0.00461231	0	0	0	0.0168721	0	0.014793	0	0	0	0.127149	0	0.019034	0.00217676	0	0.0592566	0.0149704	0	0.156344	0.106751	0	0.00329179	0.0540387	0.227355	0.0982208	0	0	0	0
N_B_a3NGC-T2-LeX	Neu5Gca2-3Galb1-4GlcNAcb1-3Galb1-4(Fuca1-3)GlcNAcb1-2Mana1-6(Neu5Gca2-3Galb1-4GlcNAcb1-3Galb1-4(Fuca1-3)GlcNAcb1-2Mana1-3)Manb1-4GlcNAcb1-4GlcNAc?	0.0113123	0.867149	0.19104	0.546996	0	0.0157789	0.0628449	0	0.0117214	0	0	0.00834867	0.0294132	0	0	0.442527	0	0	0.0741688	0.00461231	0	0.0830394	0	0.0168721	0	0.014793	0	0	0	0.127149	0	0.45381	0.00217676	0	0.155339	0.0149704	0.809729	0.156344	0.106751	0	0.000283398	0.0540387	0.227355	0.0982208	0	0	0	0
N_B_a6NGC-T2-LeX	Neu5Gca2-6Galb1-4GlcNAcb1-3Galb1-4(Fuca1-3)GlcNAcb1-2Mana1-6(Neu5Gca2-6Galb1-4GlcNAcb1-3Galb1-4(Fuca1-3)GlcNAcb1-2Mana1-3)Manb1-4GlcNAcb1-4GlcNAc?	0.0113123	0.867149	0.19104	0.546996	0	0.0157789	0.0628449	0	0.0117214	0	0	0.00834867	0.0294132	0	0	0.442527	0	0	0	0.00461231	0	0	0	0	0	0.014793	0	0	0	0.127149	0	0.019034	0.00217676	0	0.155339	0.0149704	0.121657	0.156344	0.106751	0	0.000283398	0.0540387	0.227355	0.0982208	0	0	0	0
N_B_a3NGC-LeX-LeX	Neu5Gca2-3Galb1-4(Fuca1-3)GlcNAcb1-3Galb1-4(Fuca1-3)GlcNAcb1-2Mana1-6(Neu5Gca2-3Galb1-4(Fuca1-3)GlcNAcb1-3Galb1-4(Fuca1-3)GlcNAcb1-2Mana1-3)Manb1-4GlcNAcb1-4GlcNAc?	0.0113123	0.867149	0	0.546996	0.566231	0.0157789	0.0628449	0	0.0117214	0	0	0.00834867	0.0294132	0.0416674	0	0.442527	0	0	0.0741688	0.00461231	0	0	0	0.0168721	0	0.014793	0	0	0	0.127149	0	0.45381	0.00217676	0	0.155339	-0.047063	0.121657	0.156344	0.106751	0	0.00329179	0.0540387	0.227355	0.287441	0	0	0	0
N_B_a3NGC-LeA-LeX	Neu5Gca2-3Galb1-3(Fuca1-4)GlcNAcb1-3Galb1-4(Fuca1-3)GlcNAcb1-2Mana1-6(Neu5Gca2-3Galb1-3(Fuca1-4)GlcNAcb1-3Galb1-4(Fuca1-3)GlcNAcb1-2Mana1-3)Manb1-4GlcNAcb1-4GlcNAc?	0.0952203	0.782694	0	0.546996	0	0.0753751	1	0	0.0117214	0	0	0.00834867	0.0294132	0	0	0.442527	0	0	0	0.00461231	0	0	0	0.0168721	0	0.014793	0	0	0	0.127149	0	0.019034	0.00217676	0	0.0592566	0.0149704	0	0.156344	0.106751	0	0.00329179	0.0540387	0.227355	0.594858	0	0	0	0
N_B_a3NGC-T1-LeX	Neu5Gca2-3Galb1-3GlcNAcb1-3Galb1-4(Fuca1-3)GlcNAcb1-2Mana1-6(Neu5Gca2-3Galb1-3GlcNAcb1-3Galb1-4(Fuca1-3)GlcNAcb1-2Mana1-3)Manb1-4GlcNAcb1-4GlcNAc?	0.0952203	0.867149	0	0.546996	0	0.0753751	1	0	0.0117214	0	0	0.00834867	0.0294132	0	0	0.442527	0	0	0	0.00461231	0	0	0	0.0168721	0	0.014793	0	0	0	0.127149	0	0.019034	0.00217676	0	0.0592566	0.0149704	0	0.156344	0.106751	0	0.00329179	0.0540387	0.227355	0.0982208	0	0	0	0
N_B_NAC-NAC-T2-LeX	Neu5Aca2-8Neu5Aca2-3Galb1-4GlcNAcb1-3Galb1-4(Fuca1-3)GlcNAcb1-2Mana1-6(Neu5Aca2-8Neu5Aca2-3Galb1-4GlcNAcb1-3Galb1-4(Fuca1-3)GlcNAcb1-2Mana1-3)Manb1-4GlcNAcb1-4GlcNAc?	0.0113123	0.867149	0.19104	0.546996	0	0.0157789	0.0628449	0	0.0117214	0	0	0.00834867	0.0294132	0	0	0.442527	0	0	0.0741688	0.00461231	0	0.0830394	0	0.0168721	0	0.014793	0	0	0	0.127149	0	0.45381	0.00217676	0	0.155339	0.0149704	0.635298	0.156344	0.106751	0	0.000283398	0.0540387	0.227355	0.0982208	0	0	0	0
N_B_NGC-NAC-T2-LeX	Neu5Gca2-8Neu5Aca2-3Galb1-4GlcNAcb1-3Galb1-4(Fuca1-3)GlcNAcb1-2Mana1-6(Neu5Gca2-8Neu5Aca2-3Galb1-4GlcNAcb1-3Galb1-4(Fuca1-3)GlcNAcb1-2Mana1-3)Manb1-4GlcNAcb1-4GlcNAc?	0.0113123	0.867149	0.19104	0.546996	0	0.0157789	0.0628449	0	0.0117214	0	0	0.00834867	0.0294132	0	0	0.442527	0	0	0.0741688	0.00461231	0	0.0830394	0	0.0168721	0	0.014793	0	0	0	0.127149	0	0.45381	0.00217676	0	0.155339	0.0149704	0.44669	0.156344	0.106751	0	0.000283398	0.0540387	0.227355	0.0982208	0	0	0	0
N_B_NAC-NGC-T2-LeX	Neu5Aca2-8Neu5Gca2-3Galb1-4GlcNAcb1-3Galb1-4(Fuca1-3)GlcNAcb1-2Mana1-6(Neu5Aca2-8Neu5Gca2-3Galb1-4GlcNAcb1-3Galb1-4(Fuca1-3)GlcNAcb1-2Mana1-3)Manb1-4GlcNAcb1-4GlcNAc?	0.0113123	0.867149	0.19104	0.546996	0	0.0157789	0.0628449	0	0.0117214	0	0	0.00834867	0.0294132	0	0	0.442527	0	0	0.0741688	0.00461231	0	0.0830394	0	0.0168721	0	0.014793	0	0	0	0.127149	0	0.45381	0.00217676	0	0.155339	0.0149704	0.635298	0.156344	0.106751	0	0.000283398	0.0540387	0.227355	0.0982208	0	0	0	0
N_B_NGC-NGC-T2-LeX	Neu5Gca2-8Neu5Gca2-3Galb1-4GlcNAcb1-3Galb1-4(Fuca1-3)GlcNAcb1-2Mana1-6(Neu5Gca2-8Neu5Gca2-3Galb1-4GlcNAcb1-3Galb1-4(Fuca1-3)GlcNAcb1-2Mana1-3)Manb1-4GlcNAcb1-4GlcNAc?	0.0113123	0.867149	0.19104	0.546996	0	0.0157789	0.0628449	0	0.0117214	0	0	0.00834867	0.0294132	0	0	0.442527	0	0	0.0741688	0.00461231	0	0.0830394	0	0.0168721	0	0.014793	0	0	0	0.127149	0	0.45381	0.00217676	0	0.155339	0.0149704	0.44669	0.156344	0.106751	0	0.000283398	0.0540387	0.227355	0.0982208	0	0	0	0
N_B_NAC-NAC-T1-LeX	Neu5Aca2-8Neu5Aca2-3Galb1-3GlcNAcb1-3Galb1-4(Fuca1-3)GlcNAcb1-2Mana1-6(Neu5Aca2-8Neu5Aca2-3Galb1-3GlcNAcb1-3Galb1-4(Fuca1-3)GlcNAcb1-2Mana1-3)Manb1-4GlcNAcb1-4GlcNAc?	0.0952203	0.867149	0	0.546996	0	0.0753751	1	0	0.0117214	0	0	0.00834867	0.0294132	0	0	0.442527	0	0	0	0.00461231	0	0	0	0.0168721	0	0.014793	0	0	0	0.127149	0	0.019034	0.00217676	0	0.0592566	0.0149704	0	0.156344	0.106751	0	0.00329179	0.0540387	0.227355	0.0982208	0	0	0	0
N_B_NGC-NAC-T1-LeX	Neu5Gca2-8Neu5Aca2-3Galb1-3GlcNAcb1-3Galb1-4(Fuca1-3)GlcNAcb1-2Mana1-6(Neu5Gca2-8Neu5Aca2-3Galb1-3GlcNAcb1-3Galb1-4(Fuca1-3)GlcNAcb1-2Mana1-3)Manb1-4GlcNAcb1-4GlcNAc?	0.0952203	0.867149	0	0.546996	0	0.0753751	1	0	0.0117214	0	0	0.00834867	0.0294132	0	0	0.442527	0	0	0	0.00461231	0	0	0	0.0168721	0	0.014793	0	0	0	0.127149	0	0.019034	0.00217676	0	0.0592566	0.0149704	0	0.156344	0.106751	0	0.00329179	0.0540387	0.227355	0.0982208	0	0	0	0
N_B_NAC-NGC-T1-LeX	Neu5Aca2-8Neu5Gca2-3Galb1-3GlcNAcb1-3Galb1-4(Fuca1-3)GlcNAcb1-2Mana1-6(Neu5Aca2-8Neu5Gca2-3Galb1-3GlcNAcb1-3Galb1-4(Fuca1-3)GlcNAcb1-2Mana1-3)Manb1-4GlcNAcb1-4GlcNAc?	0.0952203	0.867149	0	0.546996	0	0.0753751	1	0	0.0117214	0	0	0.00834867	0.0294132	0	0	0.442527	0	0	0	0.00461231	0	0	0	0.0168721	0	0.014793	0	0	0	0.127149	0	0.019034	0.00217676	0	0.0592566	0.0149704	0	0.156344	0.106751	0	0.00329179	0.0540387	0.227355	0.0982208	0	0	0	0
N_B_NGC-NGC-T1-LeX	Neu5Gca2-8Neu5Gca2-3Galb1-3GlcNAcb1-3Galb1-4(Fuca1-3)GlcNAcb1-2Mana1-6(Neu5Gca2-8Neu5Gca2-3Galb1-3GlcNAcb1-3Galb1-4(Fuca1-3)GlcNAcb1-2Mana1-3)Manb1-4GlcNAcb1-4GlcNAc?	0.0952203	0.867149	0	0.546996	0	0.0753751	1	0	0.0117214	0	0	0.00834867	0.0294132	0	0	0.442527	0	0	0	0.00461231	0	0	0	0.0168721	0	0.014793	0	0	0	0.127149	0	0.019034	0.00217676	0	0.0592566	0.0149704	0	0.156344	0.106751	0	0.00329179	0.0540387	0.227355	0.0982208	0	0	0	0
N_B_3'S-T2	(3S)Galb1-4GlcNAcb1-2Mana1-6((3S)Galb1-4GlcNAcb1-2Mana1-3)Manb1-4GlcNAcb1-4GlcNAc?	0.0952203	-0.00834872	0	0.546996	0	0.358576	0	0	0.0117214	0	0	0.00834867	0.0294132	-0.00874195	0	0.526003	0	0	0	0.00173771	0	0.930442	0.000382397	0	0	0.014793	0	0	0	0.127149	0	0.019034	0.00217676	0	0.0592566	0	1	0.156344	0.106751	0	0.00329179	0.0540387	0.909909	0	0	0.359576	0.000318979	0
N_B_3'S-T1	(3S)Galb1-3GlcNAcb1-2Mana1-6((3S)Galb1-3GlcNAcb1-2Mana1-3)Manb1-4GlcNAcb1-4GlcNAc?	0.0952203	-0.00834872	0	0.546996	0	0.358576	0	0	0.100992	0	0	0.397135	0.332145	-0.00874195	0	0.489715	0	0	0	0.00461231	0	1	0	0.0048392	0	0.014793	0	0	0	0.127149	0	0.12072	0.0440631	0	0.0592566	0	0.335592	0.156344	0.106751	0	0.00329179	0.1682	0.207874	0	0	0	0	0
N_B_3'S-LeX	(3S)Galb1-4(Fuca1-3)GlcNAcb1-2Mana1-6((3S)Galb1-4(Fuca1-3)GlcNAcb1-2Mana1-3)Manb1-4GlcNAcb1-4GlcNAc?	0.0952203	0.867149	0	0.546996	0	0.358576	0	0	0.0117214	0	0	0.00834867	0.0294132	-0.00775364	0	0.442527	0	0	0	0.00461231	0	0.0130762	0	0	0	0.014793	0	0	0	0.127149	0	0.019034	0.00217676	0	0.0592566	0	0.396167	0.156344	0.106751	0	0.00329179	0.0540387	0.227355	0.0982208	0	0	0	0
N_B_3'S-LeA	(3S)Galb1-3(Fuca1-4)GlcNAcb1-2Mana1-6((3S)Galb1-3(Fuca1-4)GlcNAcb1-2Mana1-3)Manb1-4GlcNAcb1-4GlcNAc?	0.0952203	0.90163	0	0.546996	0	0.358576	0.55338	0	0.100992	0	0	0.0131061	0.105815	-0.00775364	0	0.489715	0	0	0	0.00461231	0	1	0	0	0	0.014793	0	0	0	0.127149	0	0.12072	0.0440631	0	0.0592566	0	0.335592	0.156344	0.106751	0	0.00329179	0.1682	0.207874	0.0777391	0	0	0	0
N_B_3'S-6S-T2	(3S)Galb1-4(6S)GlcNAcb1-2Mana1-6((3S)Galb1-4(6S)GlcNAcb1-2Mana1-3)Manb1-4GlcNAcb1-4GlcNAc?	0.0952203	-0.00834872	0	0.546996	0	0.358576	0	0	0.0117214	0	0	0.00834867	0.0294132	-0.00874195	0	0.452812	0	0	0	0.00173771	0	0.930442	0.000382397	0	0	0.014793	0	0	0	0.127149	0	0.019034	0.00217676	0.00897415	0.0592566	0	1	0.156344	0.106751	0	0.00329179	0.0540387	0.909909	0	0	0.359576	0.000318979	0
N_B_3'S-6S-T1	(3S)Galb1-3(6S)GlcNAcb1-2Mana1-6((3S)Galb1-3(6S)GlcNAcb1-2Mana1-3)Manb1-4GlcNAcb1-4GlcNAc?	0.0952203	-0.00834872	0	0.546996	0	0.358576	0	0	0.100992	0	0	0.397135	0.332145	-0.00874195	0	0.489715	0	0	0	0.00461231	0	1	0	0	0	0.014793	0	0	0	0.127149	0	0.12072	0.0440631	0	0.0592566	0	0.335592	0.156344	0.106751	0	0.00329179	0.1682	0.207874	0	0	0	0	0
N_B_3'S-6S-LeX	(3S)Galb1-4(Fuca1-3)(6S)GlcNAcb1-2Mana1-6((3S)Galb1-4(Fuca1-3)(6S)GlcNAcb1-2Mana1-3)Manb1-4GlcNAcb1-4GlcNAc?	0.0952203	0.867149	0	0.546996	0	0.358576	0	0	0.0117214	0	0	0.00834867	0.0294132	-0.00775364	0	0.442527	0	0	0	0.00461231	0	0.0130762	0	0	0	0.014793	0	0	0	0.127149	0	0.019034	0.00217676	0	0.0592566	0	0.396167	0.156344	0.106751	0	0.00329179	0.0540387	0.227355	0.0982208	0	0	0	0
N_B_3'S-6S-LeA	(3S)Galb1-3(Fuca1-4)(6S)GlcNAcb1-2Mana1-6((3S)Galb1-3(Fuca1-4)(6S)GlcNAcb1-2Mana1-3)Manb1-4GlcNAcb1-4GlcNAc?	0.0952203	0.574576	0	0.546996	0	0.358576	0.55338	0	0.100992	0	0	0.0131061	0.105815	-0.00775364	0	0.489715	0	0	0	0.00461231	0	1	0	0	0	0.014793	0	0	0	0.127149	0	0.12072	0.0440631	0	0.0592566	0	0.335592	0.156344	0.106751	0	0.00329179	0.1682	0.207874	0.0777391	0	0	0	0
N_B_6'S-T2	(6S)Galb1-4GlcNAcb1-2Mana1-6((6S)Galb1-4GlcNAcb1-2Mana1-3)Manb1-4GlcNAcb1-4GlcNAc?	0.0952203	-0.00834872	0	0.0715595	0	0.358576	0	0	0.0117214	0	0	0.758574	0.848553	0	0	0.526003	0	0	0	0.00173771	0	0	0	0	0	0.00383122	0	0	0	0.127149	0	0.019034	0.00217676	0	0.0592566	0	0	0.156344	0.106751	0	0.00329179	0.0540387	1	0	0	0	0	0
N_B_6'S-T1	(6S)Galb1-3GlcNAcb1-2Mana1-6((6S)Galb1-3GlcNAcb1-2Mana1-3)Manb1-4GlcNAcb1-4GlcNAc?	0.0952203	-0.00834872	0	0	0	0.358576	0.213511	0	0.100992	0	0	0.789569	0.948527	0	0	0.489715	0	0	0	0.00461231	0	0	0	0	0	0.00383122	0	0	0	0.127149	0	0.12072	0.0440631	0	0.0592566	0	0	0.156344	0.106751	0	0.00329179	0.1682	0.763584	0	0.446142	0	0	0
N_B_6'S-LeX	(6S)Galb1-4(Fuca1-3)GlcNAcb1-2Mana1-6((6S)Galb1-4(Fuca1-3)GlcNAcb1-2Mana1-3)Manb1-4GlcNAcb1-4GlcNAc?	0.0952203	0.867149	0	0	0	0.358576	0	0	0.0117214	0	0	0.00834867	0.0294132	0	0	0.526003	0	0	0	0.00461231	0	0	0	0	0	0.00383122	0	0	0	0.127149	0	0.019034	0.00217676	0	0.0592566	0	0	0.156344	0.106751	0	0.00329179	0.0540387	0.763584	0.0982208	0	0	0	0
N_B_6'S-LeA	(6S)Galb1-3(Fuca1-4)GlcNAcb1-2Mana1-6((6S)Galb1-3(Fuca1-4)GlcNAcb1-2Mana1-3)Manb1-4GlcNAcb1-4GlcNAc?	0.0952203	0.574576	0	0	0	0.358576	0.55338	0	0.100992	0	0	0.0131061	0.105815	0	0	0.489715	0	0	0	0.00461231	0	0	0	0	0	0.00383122	0	0	0	0.127149	0	0.12072	0.0440631	0	0.0592566	0	0	0.156344	0.106751	0	0.00329179	0.1682	0.763584	0.0777391	0.446142	0	0	0
N_B_6'S-6S-T2	(6S)Galb1-4(6S)GlcNAcb1-2Mana1-6((6S)Galb1-4(6S)GlcNAcb1-2Mana1-3)Manb1-4GlcNAcb1-4GlcNAc?	0.0952203	-0.00834872	0	0.0715595	0	0.358576	0	0	0.0117214	0	0	0.758574	0.848553	0	0	0.452812	0	0	0	0.00173771	0	0	0	0	0	0.00383122	0	0	0	0.127149	0	0.019034	0.00217676	0	0.0592566	0	0	0.156344	0.106751	0	0.00329179	0.0540387	1	0	0	0	0	0
N_B_6'S-6S-T1	(6S)Galb1-3(6S)GlcNAcb1-2Mana1-6((6S)Galb1-3(6S)GlcNAcb1-2Mana1-3)Manb1-4GlcNAcb1-4GlcNAc?	0.0952203	-0.00834872	0	0	0	0.358576	0.213511	0	0.100992	0	0	0.789569	0.948527	0	0	0.489715	0	0	0	0.00461231	0	0	0	0	0	0.00383122	0	0	0	0.127149	0	0.12072	0.0440631	0	0.0592566	0	0	0.156344	0.106751	0	0.00329179	0.1682	0.763584	0	0.446142	0	0	0
N_B_6'S-6S-LeX	(6S)Galb1-4(Fuca1-3)(6S)GlcNAcb1-2Mana1-6((6S)Galb1-4(Fuca1-3)(6S)GlcNAcb1-2Mana1-3)Manb1-4GlcNAcb1-4GlcNAc?	0.0952203	0.867149	0	0	0	0.358576	0	0	0.0117214	0	0	0.00834867	0.0294132	0	0	0.526003	0	0	0	0.00461231	0	0	0	0	0	0.00383122	0	0	0	0.127149	0	0.019034	0.00217676	0	0.0592566	0	0	0.156344	0.106751	0	0.00329179	0.0540387	0.763584	0.0982208	0	0	0	0
N_B_6'S-6S-LeA	(6S)Galb1-3(Fuca1-4)(6S)GlcNAcb1-2Mana1-6((6S)Galb1-3(Fuca1-4)(6S)GlcNAcb1-2Mana1-3)Manb1-4GlcNAcb1-4GlcNAc?	0.0952203	0.574576	0	0	0	0.358576	0.55338	0	0.100992	0	0	0.0131061	0.105815	0	0	0.489715	0	0	0	0.00461231	0	0	0	0	0	0.00383122	0	0	0	0.127149	0	0.12072	0.0440631	0	0.0592566	0	0	0.156344	0.106751	0	0.00329179	0.1682	0.763584	0.0777391	0.446142	0	0	0
N_B_a3NAC-6S-T2	Neu5Aca2-3Galb1-4(6S)GlcNAcb1-2Mana1-6(Neu5Aca2-3Galb1-4(6S)GlcNAcb1-2Mana1-3)Manb1-4GlcNAcb1-4GlcNAc?	0.0952203	-0.00834872	0	0.546996	0	0.0753751	0	0.253625	0.0117214	0	0	0.00834867	0.0294132	0	0	0.559656	0	0	0	-0.00193494	0	0.930442	0.000382397	0	0	-0.0189707	0	0	0	0.127149	0	0.019034	0.00217676	0.00897415	0	0	0.430146	0.156344	0.106751	0	0.00329179	0.0540387	0.909909	0	0	0.359576	0.000318979	0
N_B_a3NAC-6S-T1	Neu5Aca2-3Galb1-3(6S)GlcNAcb1-2Mana1-6(Neu5Aca2-3Galb1-3(6S)GlcNAcb1-2Mana1-3)Manb1-4GlcNAcb1-4GlcNAc?	0.0952203	-0.00834872	0	0.546996	0	0.358576	0	0	0.100992	0	0	0.397135	0.332145	0	0	0.489715	0	0	0	0.00461231	0	0	0	0	0	0.014793	0	0	0	0.127149	0	0.12072	0.0440631	0	0	0	0	0.156344	0.106751	0	0.00329179	0.1682	0.207874	0	0	0	0	0
N_B_a3NAC-6S-LeX	Neu5Aca2-3Galb1-4(Fuca1-3)(6S)GlcNAcb1-2Mana1-6(Neu5Aca2-3Galb1-4(Fuca1-3)(6S)GlcNAcb1-2Mana1-3)Manb1-4GlcNAcb1-4GlcNAc?	0.0952203	0.838129	0	0.546996	0	0.0753751	0	0.253625	0.0117214	0	0	0.00834867	0.0294132	0	0	0.559656	0	0	0	0.00461231	0	0	0	0	0	-0.0189707	0	0	0	0.127149	0	0.019034	0.00217676	0	0	0	0	0.156344	0.106751	0	0.00329179	0.0540387	0.227355	0.0982208	0	0	0	0
N_B_a3NAC-6S-LeA	Neu5Aca2-3Galb1-3(Fuca1-4)(6S)GlcNAcb1-2Mana1-6(Neu5Aca2-3Galb1-3(Fuca1-4)(6S)GlcNAcb1-2Mana1-3)Manb1-4GlcNAcb1-4GlcNAc?	0.0952203	0.838129	0	0.546996	0	0.358576	0.55338	0	0.100992	0	0	0.0131061	0.105815	0	0	0.489715	0	0	0	0.00461231	0	0	0	0	0	0.014793	0	0	0	0.127149	0	0.12072	0.0440631	0	0	0	0	0.156344	0.106751	0	0.00329179	0.1682	0.207874	0.0777391	0	0	0	0
N_B_a3NAC-6'S-T2	Neu5Aca2-3(6S)Galb1-4GlcNAcb1-2Mana1-6(Neu5Aca2-3(6S)Galb1-4GlcNAcb1-2Mana1-3)Manb1-4GlcNAcb1-4GlcNAc?	0.0952203	-0.00834872	0	0	0	0.0753751	0	0.253625	0.0117214	0	0	0.00834867	0.0294132	0	0	0.559656	0	0	0	-0.00193494	0	0	0	0	0	-0.0189707	0	0	0	0.127149	0	0.019034	0.00217676	0	0.0592566	0	0	0.156344	0.106751	0	0.00329179	0.0540387	1	0	0	0.173572	0	0
N_B_a3NAC-6'S-T1	Neu5Aca2-3(6S)Galb1-3GlcNAcb1-2Mana1-6(Neu5Aca2-3(6S)Galb1-3GlcNAcb1-2Mana1-3)Manb1-4GlcNAcb1-4GlcNAc?	0.0952203	-0.00834872	0	0	0	0.358576	0	0	0.100992	0	0	0.397135	0.332145	0	0	0.489715	0	0	0	0.00461231	0	0	0	0	0	0.014793	0	0	0	0.127149	0	0.12072	0.0440631	0	0.0592566	0	0	0.156344	0.106751	0	0.00329179	0.1682	0.763584	0	0	0	0	0
N_B_a3NAC-6'S-LeX	Neu5Aca2-3(6S)Galb1-4(Fuca1-3)GlcNAcb1-2Mana1-6(Neu5Aca2-3(6S)Galb1-4(Fuca1-3)GlcNAcb1-2Mana1-3)Manb1-4GlcNAcb1-4GlcNAc?	0.0952203	0.838129	0	0	0	0.0753751	0	0.253625	0.0117214	0	0	0.00834867	0.0294132	0	0	0.559656	0	0	0	0.00461231	0	0	0	0	0	-0.0189707	0	0	0	0.127149	0	0.019034	0.00217676	0	0.0592566	-0.047063	0	0.156344	0.106751	0	0.00329179	0.0540387	0.763584	0.0982208	0	0	0	0
N_B_a3NAC-6'S-LeA	Neu5Aca2-3(6S)Galb1-3(Fuca1-4)GlcNAcb1-2Mana1-6(Neu5Aca2-3(6S)Galb1-3(Fuca1-4)GlcNAcb1-2Mana1-3)Manb1-4GlcNAcb1-4GlcNAc?	0.0952203	0.558742	0	0	0	0.358576	0.55338	0	0.100992	0	0	0.0131061	0.105815	0	0	0.489715	0	0	0	0.00461231	0	0	0	0	0	0.014793	0	0	0	0.127149	0	0.12072	0.0440631	0	0.0592566	0	0	0.156344	0.106751	0	0.00329179	0.1682	0.763584	0.0777391	0	0	0	0
N_B_a3NAC-6'S-6S-T2	Neu5Aca2-3(6S)Galb1-4(6S)GlcNAcb1-2Mana1-6(Neu5Aca2-3(6S)Galb1-4(6S)GlcNAcb1-2Mana1-3)Manb1-4GlcNAcb1-4GlcNAc?	0.0952203	-0.00834872	0	0	0	0.0753751	0	0.253625	0.0117214	0	0	0.00834867	0.0294132	0	0	0.559656	0	0	0	-0.00193494	0	0	0	0	0	-0.0189707	0	0	0	0.127149	0	0.019034	0.00217676	0	0.0592566	0	0	0.156344	0.106751	0	0.00329179	0.0540387	1	0	0	0.173572	0	0
N_B_a3NAC-6'S-6S-T1	Neu5Aca2-3(6S)Galb1-3(6S)GlcNAcb1-2Mana1-6(Neu5Aca2-3(6S)Galb1-3(6S)GlcNAcb1-2Mana1-3)Manb1-4GlcNAcb1-4GlcNAc?	0.0952203	-0.00834872	0	0	0	0.358576	0	0	0.100992	0	0	0.397135	0.332145	0	0	0.489715	0	0	0	0.00461231	0	0	0	0	0	0.014793	0	0	0	0.127149	0	0.12072	0.0440631	0	0.0592566	0	0	0.156344	0.106751	0	0.00329179	0.1682	0.763584	0	0	0	0	0
N_B_a3NAC-6'S-6S-LeX	Neu5Aca2-3(6S)Galb1-4(Fuca1-3)(6S)GlcNAcb1-2Mana1-6(Neu5Aca2-3(6S)Galb1-4(Fuca1-3)(6S)GlcNAcb1-2Mana1-3)Manb1-4GlcNAcb1-4GlcNAc?	0.0952203	0.838129	0	0	0	0.0753751	0	0.253625	0.0117214	0	0	0.00834867	0.0294132	0	0	0.559656	0	0	0	0.00461231	0	0	0	0	0	-0.0189707	0	0	0	0.127149	0	0.019034	0.00217676	0	0.0592566	0	0	0.156344	0.106751	0	0.00329179	0.0540387	0.763584	0.0982208	0	0	0	0
N_B_a3NAC-6'S-6S-LeA	Neu5Aca2-3(6S)Galb1-3(Fuca1-4)(6S)GlcNAcb1-2Mana1-6(Neu5Aca2-3(6S)Galb1-3(Fuca1-4)(6S)GlcNAcb1-2Mana1-3)Manb1-4GlcNAcb1-4GlcNAc?	0.0952203	0.838129	0	0	0	0.358576	0.55338	0	0.100992	0	0	0.0131061	0.105815	0	0	0.489715	0	0	0	0.00461231	0	0	0	0	0	0.014793	0	0	0	0.127149	0	0.12072	0.0440631	0	0.0592566	0	0	0.156344	0.106751	0	0.00329179	0.1682	0.763584	0.0777391	0	0	0	0
N_B_6S-T2	Galb1-4(6S)GlcNAcb1-2Mana1-6(Galb1-4(6S)GlcNAcb1-2Mana1-3)Manb1-4GlcNAcb1-4GlcNAc?	0.0952203	-0.00834872	0	0.546996	0	0.358576	0	0	0.0117214	0	0.298506	0.758574	0.848553	0	0	0.452812	0.025176	0	0	0.552497	0	0.930442	0.000382397	0	0	0.00383122	0	0	0	0.127149	0	0.019034	0.00217676	0.00897415	0	0	0.0337106	0.156344	0.106751	0	0.00329179	0.0540387	0.909909	0	0	0.359576	0.000318979	0
N_B_6S-T1	Galb1-3(6S)GlcNAcb1-2Mana1-6(Galb1-3(6S)GlcNAcb1-2Mana1-3)Manb1-4GlcNAcb1-4GlcNAc?	0.0952203	-0.00834872	0	0.546996	0	0.358576	0.213511	0	0.100992	0	1	0.789569	0.948527	0	0	0.489715	0	0	0	0.00461231	0	0	0	0	0	0.0156791	0	0	0	0.127149	0	0.12072	0.0440631	0	0	0	0	0.156344	0.106751	0	0.00329179	0.1682	0.986203	0	0.446142	0	0	0
N_B_6S-LeX	Galb1-4(Fuca1-3)(6S)GlcNAcb1-2Mana1-6(Galb1-4(Fuca1-3)(6S)GlcNAcb1-2Mana1-3)Manb1-4GlcNAcb1-4GlcNAc?	0.0952203	0.867149	0	0.546996	0	0.358576	0	0	0.0117214	0	0.298506	0.00834867	0.0294132	0	0	0.442527	0	0	0	0.00461231	0	0	0	0	0	0.0156791	0	0	0	0.127149	0	0.019034	0.00217676	0	0	0	0.0337106	0.156344	0.106751	0	0.00329179	0.0540387	0.227355	0.0982208	0	0	0	0
N_B_6S-LeA	Fuca1-4(Galb1-3)(6S)GlcNAcb1-2Mana1-6(Fuca1-4(Galb1-3)(6S)GlcNAcb1-2Mana1-3)Manb1-4GlcNAcb1-4GlcNAc?	0.0952203	0.574576	0	0.546996	0	0.358576	0.55338	0	0.100992	0	1	0.0131061	0.105815	0	0	0.489715	0	0	0	0.00461231	0	0	0	0	0	0.0156791	0	0	0	0.127149	0	0.12072	0.0440631	0	0	0	0	0.156344	0.106751	0	0.00329179	0.1682	0.986203	0.0777391	0.446142	0	0	0
N_B_6S-BGH2	Fuca1-2Galb1-4(6S)GlcNAcb1-2Mana1-6(Fuca1-2Galb1-4(6S)GlcNAcb1-2Mana1-3)Manb1-4GlcNAcb1-4GlcNAc?	0.0952203	0.838129	0	0.546996	0	0.0753751	0.0428297	0	0.0117214	0	0	0.128588	0.234772	0.0684455	0	0.40033	0	0	0	0.188608	0	0	0.000382397	0	0	0.00383122	0	0	0	0.127149	0	0.066638	0.00217676	0	0.0592566	0	0	0.156344	0.106751	0	0.00329179	0.0540387	0.909909	0.326389	0	0	0	0
N_B_6S-BGH1	Fuca1-2Galb1-3(6S)GlcNAcb1-2Mana1-6(Fuca1-2Galb1-3(6S)GlcNAcb1-2Mana1-3)Manb1-4GlcNAcb1-4GlcNAc?	0.0952203	0.838129	0	0.546996	0	0.358576	0.27628	0	0.100992	0	0	0.397135	0.332145	0	0	0.489715	0	0	0	0.00461231	0	0	0	0	0	0.00383122	0	0	0	0.127149	0	0.019034	0.0440631	0	0.0592566	0	0	0.156344	0.106751	0	0.00329179	0.1682	0.145941	0.172979	0	0	0	0
N_B_6S-LeY	Fuca1-2Galb1-4(Fuca1-3)(6S)GlcNAcb1-2Mana1-6(Fuca1-2Galb1-4(Fuca1-3)(6S)GlcNAcb1-2Mana1-3)Manb1-4GlcNAcb1-4GlcNAc?	0.0952203	0.838129	0	0.546996	0	0.0753751	0.0428297	0	0.0117214	0	0	0.0131061	0.105815	0	0	0.294833	0	0	0	0.00461231	0	0	0	0	0	0.0156791	0	0	0	0.127149	0	0.066638	0.00217676	0	0.0592566	0	0	0.156344	0.106751	0	0.00329179	0.0540387	0.227355	0.0982208	0	0	0	0
N_B_6S-LeB	Fuca1-2Galb1-3(Fuca1-4)(6S)GlcNAcb1-2Mana1-6(Fuca1-2Galb1-3(Fuca1-4)(6S)GlcNAcb1-2Mana1-3)Manb1-4GlcNAcb1-4GlcNAc?	0.0952203	0.838129	0	0.546996	0	0.358576	0.55338	0	0.100992	0	0	0.0131061	0.105815	0	0	0.489715	0	0	0	0.00461231	0	0	0	0	0	0.00383122	0	0	0	0.127149	0	0.019034	0.0440631	0	0.0592566	0	0	0.156344	0.106751	0	0.00329179	0.1682	0.145941	0.172979	0	0	0	0
N_B_6'S-6S-BGH2	Fuca1-2(6S)Galb1-4(6S)GlcNAcb1-2Mana1-6(Fuca1-2(6S)Galb1-4(6S)GlcNAcb1-2Mana1-3)Manb1-4GlcNAcb1-4GlcNAc?	0.0952203	0.838129	0	0.0715595	0	0.0753751	0.0428297	0	0.0117214	0	0	0.128588	0.234772	0	0	0.40033	0	0	0	0.188608	0	0	0	0	0	0.00383122	0	0	0	0.127149	0	0.066638	0.00217676	0	0.0592566	0	0	0.156344	0.106751	0	0.00329179	0.0540387	1	0.326389	0	0	0	0
N_B_6'S-6S-BGH1	Fuca1-2(6S)Galb1-3(6S)GlcNAcb1-2Mana1-6(Fuca1-2(6S)Galb1-3(6S)GlcNAcb1-2Mana1-3)Manb1-4GlcNAcb1-4GlcNAc?	0.0952203	0.838129	0	0	0	0.358576	0.27628	0	0.100992	0	0	0.397135	0.332145	0	0	0.489715	0	0	0	0.00461231	0	0	0	0	0	0.00383122	0	0	0	0.127149	0	0.019034	0.0440631	0	0.0592566	0	0	0.156344	0.106751	0	0.00329179	0.1682	0.145941	0.402697	0	0	0	0
N_B_6'S-6S-LeY	Fuca1-2(6S)Galb1-4(Fuca1-3)(6S)GlcNAcb1-2Mana1-6(Fuca1-2(6S)Galb1-4(Fuca1-3)(6S)GlcNAcb1-2Mana1-3)Manb1-4GlcNAcb1-4GlcNAc?	0.0952203	0.838129	0	0	0	0.0753751	0.0428297	0	0.0117214	0	0	0.0131061	0.105815	0	0	0.489715	0	0	0	0.00461231	0	0	0	0	0	0.00383122	0	0	0	0.127149	0	0.066638	0.00217676	0	0.0592566	0	0	0.156344	0.106751	0	0.00329179	0.0540387	0.763584	0.0982208	0	0	0	0
N_B_6'S-6S-LeB	Fuca1-2(6S)Galb1-3(Fuca1-4)(6S)GlcNAcb1-2Mana1-6(Fuca1-2(6S)Galb1-3(Fuca1-4)(6S)GlcNAcb1-2Mana1-3)Manb1-4GlcNAcb1-4GlcNAc?	0.0952203	0.838129	0	0	0	0.358576	0.55338	0	0.100992	0	0	0.0131061	0.105815	0	0	0.489715	0	0	0	0.00461231	0	0	0	0	0	0.00383122	0	0	0	0.127149	0	0.019034	0.0440631	0	0.0592566	0	0	0.156344	0.106751	0	0.00329179	0.1682	0.145941	0.402697	0	0	0	0
N_B_Unsub	Mana1-6(Mana1-3)Manb1-4GlcNAcb1-4GlcNAc?	0.0952203	-0.00834872	0	0	0	0.877211	0.184824	1	0.433159	-1	0	0.120746	0.105815	0	0	0.636053	0	0	0	0.00461231	0	0	0	0	0	0.903482	0	0	0	1	0	0	0.0192024	0.320423	0	0	0	1	1	0	0.00329179	1	0.763584	0.167511	0	0	0	0
N_B_tGlcNAc	GlcNAcb1-2Mana1-6(GlcNAcb1-2Mana1-3)Manb1-4GlcNAcb1-4GlcNAc?	0.0952203	-0.00834872	1	0	0	0.659843	0	0	0.0117214	0	0	1	1	0	0	0.498154	0	0	0	-0.00155605	0	0	0	0	0	0.0594437	0	0.186348	0	0.127149	0	0.019034	0.0440631	0	0	0	0	0.156344	0.106751	0	0.00329179	0.1682	1	0	0	0	0	0
[truncated: 20 more columns]

## Sheet: FigureS2c
Glycan ID	Glycan Text/Lectin Model	AAA	AAL	ABA	ACG	ACA/ACL	AMA	ASA	Banlec	BC2L-A	BC2LCN	BPA	CA	CAA	CGL2	CNL	ConA	CSA	DBA	DSA	ECA	EEL	GAL1	GAL3	GAL7	GAL9	GNA	GS-I	BSL/GS-II	HAA	HHA	Jacalin	LBA	LCA/LcH A	LEA	LPA	LTL/LOTUS	MAL-1/MAA	MNA-G	MNA-M	MOA	MPA/MPL	NPA	ORYSATA	PA-IIL	PA-IL	PHA-E	PHA-L	PNA
O_Tn_Unsub	GalNAc?	0	0	0	0	0	0	0	0	0	0	0.581537	0	0	0	0.157712	0	0.335328	0.184081	0	0	0	0	0	0	0	0	-0.0252684	0	0.143257	-1.08751e-05	0.694752	0	0	0	0	0	0	0	0	0	0.0442844	0	0	0	0.190792	0	0	0
O_sTn	Neu5Aca2-6GalNAc?	0	0	0	0	0	0	0	0	0	0	0	0	0	0	0	0	0	0	0	0	0	0	0	0	0	0	0	0	0	0	0	0	0	0	0	0	0	0	0	0	0	0	0	0	0	0	0	0
O_C1_Unsub	Galb1-3GalNAc?	0	0	0.021091	1	0.196762	0	0	0	0	0	0.263216	0	0	0	0	0	0	0	0	0	0	0	0	0	0	0	0	0	0	-1.08751e-05	0.864539	0	0	0	0	0	0	0	0	0	0.0462515	0	0	0	-0.00639867	0	0	0.496373
O_s3C1	Neu5Aca2-3Galb1-3GalNAc?	0	0	0.021091	1	1	0	0	0	0	0	-0.00848508	0	0	0	0	0	0	0	0	0	0	0	0	0	0	0	0	0	0	-1.08751e-05	0.864539	0	0	0	0	0	0	0	0	0	0.0462515	0	0	0	-0.00639867	0	0	0.0834436
O_s6C1	Neu5Aca2-6Galb1-3GalNAc?	0	0	0.021091	0	1	0	0	0	0	0	-0.00848508	0	0	0	0	0	0	0	0	0	0	0	0	0	0	0	0	0	0	-1.08751e-05	0.694752	0	0	0	0	0	0	0	0	0	0.0462515	0	0	0	-0.00639867	0	0	0
O_dis36C1	Neu5Aca2-3Galb1-3(Neu5Aca2-6)GalNAc?	0	0	0.021091	1	0.891175	0	0	0	0	0	-0.00848508	0	0	0	0	0	0	0	0	0	0	0	0	0	0	0	0	0	0	0	0	0	0	0	0	0	0	0	0	0	0	0	0	0	0	0	0	0.223431
O_dis66C1	Neu5Aca2-6Galb1-3(Neu5Aca2-6)GalNAc?	0	0	0.021091	0	0.891175	0	0	0	0	0	-0.00848508	0	0	0	0	0	0	0	0	0	0	0	0	0	0	0	0	0	0	0	0	0	0	0	0	0	0	0	0	0	0	0	0	0	0	0	0	0
O_HC1	Fuca1-2Galb1-3GalNAc?	0	0.441543	0.021091	0.546996	0.215015	0	0	0	0	0	-0.00848508	0	0	0	0	0	0	0	0	0	0	0	0	0	0	0	0	0	0	-0.000342189	0.591904	0	0	0	0	0	0	0	0	0	0.0536861	0	0	0.172979	-0.00639867	0	0	0
O_AC1	GalNAca1-3(Fuca1-2)Galb1-3GalNAc?	0	0.168368	0.021091	0.546996	0	0	0	0	0	0	-0.00848508	0	0	0	0.880239	0	-0.000233866	0.184081	0	0	0	0	0	0	0	0	0	0	0.176502	-0.000342189	0.591904	0.0576367	0	0	0	0	0	0	0	0	0.0536861	0	0	0.087846	-0.00639867	0	0	0
O_BC1	Gala1-3(Fuca1-2)Galb1-3GalNAc?	0	0.168368	0.021091	0.546996	0	0	0	0	0	0	-0.00848508	0	0	0	0	0	0	0	0	0	0.780225	0	0	0	0	0	0	0	0	-0.000342189	0.591904	0	0	0	0	0	0	0	0	0.502953	0.0536861	0	0	0.0498039	0.0535384	0	0	0
O_lBC1	Gala1-3Galb1-3GalNAc?	0	0	0.021091	1	0.571048	0	0	0	0	0	0	0	0	0	0	0	0	0	0	0	0	0	0	0	0	0	0	0	0	-1.08751e-05	0.864539	0	0	0	0	0	0	0	0	0.307456	0.0462515	0	0	0	0.205529	0	0	0.0834436
O_iC1	Galb1-4GlcNAcb1-3Galb1-3GalNAc?	0	0	0.021091	1	0.571048	0	0	0	0	0	0.427973	0	0	0	0	0	0	0	0	0.0525634	0	0	0	0	0.296427	0	0	0	0	-1.08751e-05	0.959147	0	0	0	0	0	0.0436925	0	0	0	0.0462515	0	0	0	-0.00639867	0	0	0.235907
O_IC1	Galb1-4GlcNAcb1-6(Galb1-4GlcNAcb1-3)Galb1-3GalNAc?	0	0	0.021091	1	0.571048	0	0	0	0	0	0.427973	0	0	0	0	0	0	0	0	0.0525634	0	0	0	0	0	0	0	0	0	-1.08751e-05	0.959147	0	0	0.143157	0	0	0.0436925	0	0	0	0.0462515	0	0	0	-0.00639867	0	0	0
O_SdaC1	GalNAcb1-4(Neu5Aca2-3)Galb1-3GalNAc?	0	0	0	1	0	0	0	0	0	0	-0.0107342	0	0	0	0.629725	0	0.0294549	0.504644	0	0	0	0	0	0	0	0	0	0	0	-1.08751e-05	0.694752	0.131101	0	0	0	0	0	0	0	0	0.0442844	0	0	0	-0.00639867	0	0	0
O_LeaC1	Galb1-3(Fuca1-4)GlcNAcb1-3Galb1-3GalNAc?	0	0.782694	0.021091	1	0.196762	0	0	0	0	0	0.427973	0	0	0	0	0	0	0	0	0	0	0	0	0	0.296427	0	0	0	0	-1.08751e-05	0.959147	0	0	0	0	0	0	0	0	0	0.0462515	0	0	0.594858	-0.00639867	0	0	0.235907
O_LexC1	Galb1-4(Fuca1-3)GlcNAcb1-3Galb1-3GalNAc?	0	0.700474	0.021091	1	0.196762	0	0	0	0	0	0.427973	0	0	0.0968544	0	0	0	0	0	0	0	0	0	0	0	0	0	0	0	-1.08751e-05	0.959147	0	0	0	0	0	-0.00212759	0	0	0	0.0462515	0	0	0.0982208	-0.00639867	0	0	0.235907
O_LebC1	Fuca1-2Galb1-3(Fuca1-4)GlcNAcb1-3Galb1-3GalNAc?	0	0.215661	0.021091	1	0.196762	0	0	0	0	0	0	0	0	0	0	0	0	0	0	0	0	0	0	0	0	0	0	0	0	-1.08751e-05	0.959147	0	0	0	0	0	0	0	0	0	0.0462515	0	0	0.172979	-0.00639867	0	0	0.235907
O_LeyC1	Fuca1-2Galb1-4(Fuca1-3)GlcNAcb1-3Galb1-3GalNAc?	0	0.824938	0.021091	1	0.196762	0	0	0	0	0	0	0	0	0	0	0	0	0	0	0	0	0	0	0	0	0	0	0	0	-1.08751e-05	0.959147	0	0	0	0	0.0228821	0	0	0	0	0.0462515	0	0	0.0982208	-0.00639867	0	0	0.235907
O_s3LeaC1	Neu5Aca2-3Galb1-3(Fuca1-4)GlcNAcb1-3Galb1-3GalNAc?	0	0.782694	0.021091	1	0.196762	0	0	0	0	0	0	0	0	0	0	0	0	0	0	0	0	0	0	0	0.296427	0	0	0	0	-1.08751e-05	0.959147	0	0	0	0	0	0	0	0	0	0.0462515	0	0	1	-0.00639867	0	0	0.235907
O_s3LexC1	Neu5Aca2-3Galb1-4(Fuca1-3)GlcNAcb1-3Galb1-3GalNAc?	0	0.829418	0.021091	1	0.196762	0	0	0	0	0	0	0	0	0.0968544	0	0	0	0	0	0	0	0	0	0	0	0	0	0	0	-1.08751e-05	0.959147	0	0	0	0	-0.047063	0	0	0	0	0.0462515	0	0	0.0982208	-0.00639867	0	0	0.235907
O_s6LeaC1	Neu5Aca2-6Galb1-3(Fuca1-4)GlcNAcb1-3Galb1-3GalNAc?	0	0.782694	0.021091	1	0.196762	0	0	0	0	0	0	0	0	0	0	0	0	0	0	0	0	0	0	0	0	0	0	0	0	-1.08751e-05	0.959147	0	0	0	0	0	0	0	0	0	0.0462515	0	0	1	-0.00639867	0	0	0.235907
O_s6LexC1	Neu5Aca2-6Galb1-4(Fuca1-3)GlcNAcb1-3Galb1-3GalNAc?	0	0.700474	0.021091	1	0.196762	0	0	0	0	0	0	0	0	0.0968544	0	0	0	0	0	0	0	0	0	0	0	0	0	0	0	-1.08751e-05	0.959147	0	0	0	0	-0.047063	0	0	0	0	0.0462515	0	0	0.0982208	-0.00639867	0	0	0.235907
O_C2_Unsub	Galb1-3(GlcNAcb1-6)GalNAc?	0	0	0.021091	1	0.236568	0	0	0	0	0	0.263216	0	0	0	0	0	0	0	0	0	0	0	0	0	0	0	0	0	0	0	0	0	0	0	0	0	0	0	0	0	0	0	0	0	0	0	0	0.500819
O_HC2	Fuca1-2Galb1-3(GlcNAcb1-6)GalNAc?	0	0.441543	0.021091	0.546996	0.215015	0	0	0	0	0	-0.00848508	0	0	0	0	0	0	0	0	0	0	0	0	0	0	0	0	0	0	0	0	0	0	0	0	0	0	0	0	0	0	0	0	0.172979	0	0	0	0
O_AC2	GalNAca1-3(Fuca1-2)Galb1-3(GlcNAcb1-6)GalNAc?	0	0.168368	0.021091	0.546996	0	0	0	0	0	0	-0.00848508	0	0	0	0.880239	0	-0.000233866	0.184081	0	0	0	0	0	0	0	0	0	0	0.176502	0	0	0.0576367	0	0	0	0	0	0	0	0	0	0	0	0.087846	0	0	0	0
O_BC2	Gala1-3(Fuca1-2)Galb1-3(GlcNAcb1-6)GalNAc?	0	0.168368	0.021091	0.546996	0	0	0	0	0	0	-0.00848508	0	0	0	0	0	0	0	0	0	0.780225	0	0	0	0	0	0	0	0	0	0	0	0	0	0	0	0	0	0	0.00044768	0	0	0	0.0498039	0.0535384	0	0	0
O_lBC2	Gala1-3Galb1-3(GlcNAcb1-6)GalNAc?	0	0	0.021091	1	0.236568	0	0	0	0	0	0	0	0	0	0	0	0	0	0	0	0	0	0	0	0	0	0	0	0	0	0	0	0	0	0	0	0	0	0	0.307456	0	0	0	0	0.205529	0	0	0.0139311
O_iC2	Galb1-4GlcNAcb1-3Galb1-3(GlcNAcb1-6)GalNAc?	0	0	0.181053	1	0.236568	0	0	0	0	0	0.427973	0	0	0	0	0	0	0	0	0.0525634	0	0	0	0	0.296427	0	0	0	0	0	0	0	0	0	0	0	0.0436925	0	0	0	0	0	0	0	0	0	0	0.0139311
O_IC2	Galb1-4GlcNAcb1-6(Galb1-4GlcNAcb1-3)Galb1-3(GlcNAcb1-6)GalNAc?	0	0	0.181053	1	0.236568	0	0	0	0	0	0.427973	0	0	0	0	0	0	0	0	0.0525634	0	0	0	0	0	0	0	0	0	0	0	0	0	0.143157	0	0	0.0436925	0	0	0	0	0	0	0	0	0	0	0
O_SdaC2	GalNAcb1-4(Neu5Aca2-3)Galb1-3(GlcNAcb1-6)GalNAc?	0	0	0.181053	1	0	0	0	0	0	0	-0.0107342	0	0	0	0.629725	0	0.0294549	0.504644	0	0	0	0	0	0	0	0	0	0	0	0	0	0.131101	0	0	0	0	0	0	0	0	0	0	0	0	0	0	0	0
O_s3C2	Neu5Aca2-3Galb1-3(GlcNAcb1-6)GalNAc?	0	0	0.021091	1	0.236568	0	0	0	0	0	-0.00848508	0	0	0	0	0	0	0	0	0	0	0	0	0	0	0	0	0	0	0	0	0	0	0	0	0	0	0	0	0	0	0	0	0	0	0	0	-0.0782753
O_s6C2	Neu5Aca2-6Galb1-3(GlcNAcb1-6)GalNAc?	0	0	0.021091	0	0.236568	0	0	0	0	0	-0.00848508	0	0	0	0	0	0	0	0	0	0	0	0	0	0	0	0	0	0	0	0	0	0	0	0	0	0	0	0	0	0	0	0	0	0	0	0	0
O_dis33t2C2	Neu5Aca2-3Galb1-3(Neu5Aca2-3Galb1-4GlcNAcb1-6)GalNAc?	0	0	0.021091	1	0.00592133	0	0	0	0	0	-0.00848508	0	0	0	0	0	0	0	0	0	0	0	0	0	0	0	0	0	0	0	0	0	0	0	0	0	0.146725	0	0	0	0	0	0	0	0	0	0	-0.0782753
O_dis66t2C2	Neu5Aca2-6Galb1-3(Neu5Aca2-6Galb1-4GlcNAcb1-6)GalNAc?	0	0	0.021091	0.0715595	0.00592133	0	0	0	0	0	-0.00848508	0	0	0	0	0	0	0	0	0	0	0	0	0	0	0	0	0	0	0	0	0	0	0	0	0	0	0	0	0	0	0	0	0	0	0	0	0
O_dis33t1C2	Neu5Aca2-3Galb1-3(Neu5Aca2-3Galb1-3GlcNAcb1-6)GalNAc?	0	0	0.021091	1	0.00592133	0	0	0	0	0	-0.00848508	0	0	0	0	0	0	0	0	0	0	0	0	-0.000963946	0	0	0	0	0	0	0	0	0	0	0	0	0	0	0	0	0	0	0	0	0	0	0	-0.0782753
O_dis66t1C2	Neu5Aca2-6Galb1-3(Neu5Aca2-6Galb1-3GlcNAcb1-6)GalNAc?	0	0	0.021091	0	0.00592133	0	0	0	0	0	-0.00848508	0	0	0	0	0	0	0	0	0	0	0	0	0	0	0	0	0	0	0	0	0	0	0	0	0	0	0	0	0	0	0	0	0	0	0	0	0
O_Lex_C2	Galb1-3(Galb1-4(Fuca1-3)GlcNAcb1-3Galb1-4GlcNAcb1-6)GalNAc?	0.0113123	0.700474	0.021091	1	0.00592133	0	0	0	0	0	0.427973	0	0	0.0968544	0	0	0	0	0	0	0	0	0	0	0	0	0	0	0	0	0	0.271527	0	0	0	0.24889	-0.00212759	0	0	0	0	0	0	0.0982208	0	0	0	0.500819
O_Lea_C2	Galb1-3(Galb1-3(Fuca1-4)GlcNAcb1-3Galb1-4GlcNAcb1-6)GalNAc?	0	0.782694	0.021091	1	0.00592133	0	0	0	0	0	0.427973	0	0	0	0	0	0	0	0	0	0	0	0	0	0.296427	0	0	0	0	0	0	0.271527	0	0	0	0	0	0	0	0	0	0	0	0.594858	0	0	0	0.500819
O_Ley_C2	Galb1-3(Fuca1-2Galb1-4(Fuca1-3)GlcNAcb1-3Galb1-4GlcNAcb1-6)GalNAc?	0	0.824938	0.021091	1	0.00592133	0	0	0	0	0	0.263216	0	0	0	0	0	0	0	0	0	0	0	0	0	0	0	0	0	0	0	0	0.271527	0	0	0	0.0228821	0	0	0	0	0	0	0	0.0982208	0	0	0	0.500819
O_Leb_C2	Galb1-3(Fuca1-2Galb1-3(Fuca1-4)GlcNAcb1-3Galb1-4GlcNAcb1-6)GalNAc?	0	0.215661	0.021091	1	0.00592133	0	0	0	0	0	0.263216	0	0	0	0	0	0	0	0	0	0	0	0	0	0	0	0	0	0	0	0	0.271527	0	0	0	0	0	0	0	0	0	0	0	0.172979	0	0	0	0.500819
O_dis33Lex_C2	Neu5Aca2-3Galb1-3(Neu5Aca2-3Galb1-4(Fuca1-3)GlcNAcb1-3Galb1-4GlcNAcb1-6)GalNAc?	0.0113123	0.829418	0.021091	1	0.00592133	0	0	0	0	0	-0.00848508	0	0	0.0968544	0	0	0	0	0	0	0	0	0	0	0	0	0	0	0	0	0	0	0	0	0	0.24889	0	0	0	0	0	0	0	0.0982208	0	0	0	-0.0782753
O_dis33Lea_C2	Neu5Aca2-3Galb1-3(Neu5Aca2-3Galb1-3(Fuca1-4)GlcNAcb1-3Galb1-4GlcNAcb1-6)GalNAc?	0	0.782694	0.021091	1	0.00592133	0	0	0	0	0	-0.00848508	0	0	0	0	0	0	0	0	0	0	0	0	0	0.296427	0	0	0	0	0	0	0	0	0	0	0	0	0	0	0	0	0	0	1	0	0	0	-0.0782753
O_dis66Lex_C2	Neu5Aca2-6Galb1-3(Neu5Aca2-6Galb1-4(Fuca1-3)GlcNAcb1-3Galb1-4GlcNAcb1-6)GalNAc?	0.0113123	0.700474	0.021091	1	0.00592133	0	0	0	0	0	-0.00848508	0	0	0.0968544	0	0	0	0	0	0	0	0	0	0	0	0	0	0	0	0	0	0	0	0	0	0.24889	0	0	0	0	0	0	0	0.0982208	0	0	0	0
O_dis66Lea_C2	Neu5Aca2-6Galb1-3(Neu5Aca2-6Galb1-3(Fuca1-4)GlcNAcb1-3Galb1-4GlcNAcb1-6)GalNAc?	0	0.782694	0.021091	1	0.00592133	0	0	0	0	0	-0.00848508	0	0	0	0	0	0	0	0	0	0	0	0	0	0	0	0	0	0	0	0	0	0	0	0	0	0	0	0	0	0	0	0	1	0	0	0	0
O_dis33t1_C2	Neu5Aca2-3Galb1-3(Neu5Aca2-3Galb1-3GlcNAcb1-3Galb1-4GlcNAcb1-6)GalNAc?	0	0	0.021091	1	0.00592133	0	0	0	0	0	-0.00848508	0	0	0	0	0	0	0	0	0	0	0	0	-0.000963946	0.296427	0	0	0	0	0	0	0	0	0	0	0	0	0	0	0	0	0	0	0	0	0	0	-0.0782753
O_dis66t2_C2	Neu5Aca2-6Galb1-3(Neu5Aca2-6Galb1-4GlcNAcb1-3Galb1-4GlcNAcb1-6)GalNAc?	0.0113123	0	0.021091	1	0.00592133	0	0	0	0	0	-0.00848508	0	0	0	0	0	0	0	0.0201585	0	0	0	0	0	0	0	0	0	0	0	-0.00230486	0	0	0	0	0.24889	0	0	0	0	0	0	0	0	0	0	0	0.15562
O_C3_Unsub	GlcNAcb1-3GalNAc?	1	0	0	0	0	0	0	0	0	0	0	0	0	0	0	0	0	0	0	0	0	0	0	0	0	0	0	0	0	-1.08751e-05	1	0	0	0	0	0	0	0	0	0	0.0442844	0	0	0	-0.00625361	0	0	0
O_sC3	Neu5Aca2-3Galb1-4GlcNAcb1-3GalNAc?	0	0	0	0.546996	0	0	0	0	0	0	0	0	0	0	0	0	0	0	0	0	0	0	0	0	0	0	0	0	0	0.00108012	0.86253	0	0	0	0	0	0.635298	0	0	0	0.0456664	0	0	0	-0.00625361	0	0	0
O_Ht1C3	Fuca1-2Galb1-3GlcNAcb1-3GalNAc?	0	0.296256	0	0.546996	0	0	0	0	0	0	0	0	0	0	0	0	0	0	0	0	0	0	0	0.0048392	0	0	0	0	0	0.00108012	0.486914	0	0	0	0	0	0	0	0	0	0.0456664	0	0	0.172979	-0.00625361	0	0	0
O_Ht2C3	Fuca1-2Galb1-4GlcNAcb1-3GalNAc?	0	0.603894	0	0.546996	0	0	0	0	0	0	0	0	0	0.00616978	0	0	0	0	0	0.0342479	0.351182	0	0	0	0	0	0	0	0.720337	0.00108012	0.599386	0	0	0	0	0	0	0	0	0	0.0456664	0	0	0.326389	-0.00625361	0	0	0
O_At1C3	GalNAca1-3(Fuca1-2)Galb1-3GlcNAcb1-3GalNAc?	0	-0.0123315	0	0.546996	0	0	0	0	0	0	0	0	0	-0.00494243	0.277217	0	-0.000233866	0.184081	0	0	0	0	0	0.00156524	0	0	0	0	0.176502	0.00108012	0.486914	0.175499	0	0	0	0	0	0	0	0	0.0456664	0	0	0.087846	-0.00625361	0	0	0
O_At2C3	GalNAca1-3(Fuca1-2)Galb1-4GlcNAcb1-3GalNAc?	0	0.0587359	0	0.546996	0	0	0	0	0	0	0	0	0	-0.00494243	0.277217	0	-0.000233866	0.184081	0	0	0	0	0	0	0	0	0	0	0.0390336	0.00108012	0.599386	0.0576367	0	0	0	0	0	0	0	0	0.0456664	0	0	0.087846	-0.00625361	0	0	0
O_Bt1C3	Gala1-3(Fuca1-2)Galb1-3GlcNAcb1-3GalNAc?	0	-0.0123315	0	0.546996	0	0	0	0	0	0	0	0	0	-0.00494243	0	0	0	0	0	0	0.76067	0	0	0.0048392	0	0	0	0	0	0.00108012	0.486914	0	0	0	0	0	0	0	0	0.502953	0.0456664	0	0	0.0498039	0.0535384	0	0	0
O_Bt2C3	Gala1-3(Fuca1-2)Galb1-4GlcNAcb1-3GalNAc?	0	0.0587359	0	0.546996	0	0	0	0	0	0	0	0	0	-0.00494243	0	0	0	0	0	0	1	0	0	0	0	0	0	0	0	0.00108012	0.599386	0	0	0	0	0	0	0	0	0.502953	0.0456664	0	0	0.0595036	0.0535384	0	0	0
O_lBt1C3	Gala1-3Galb1-3GlcNAcb1-3GalNAc?	0	0	0	0.546996	0	0	0	0	0	0	0	0	0	0	0	0	0	0	0	0	0	0	0	0.0048392	0	0	0	0	0	0.00108012	0.86253	0	0	0	0	0	0	0	0	0.307456	0.0456664	0	0	0	0.205529	0	0	0
O_lBt2C3	Gala1-3Galb1-4GlcNAcb1-3GalNAc?	0	0	0	0.546996	0	0	0	0	0	0	0	0	0	0	0	0	0	0	0.0201585	0	0	0	0	0	0	0	0.293749	0	0	0.00108012	0.86253	0	0	0	0	0	0	0	0	0.307456	0.0456664	0	0	0	0.698239	0	0	0
O_it1C3	Galb1-4GlcNAcb1-3Galb1-3GlcNAcb1-3GalNAc?	0.0113123	0	0	0.546996	0.000470998	0	0	0	0	0	0.427973	0	0	0	0	0	0	0	0	0.0846146	0	0.0830394	0	0.0048392	0.296427	0	0	0	0	0.00108012	0.86253	0.271527	0	0	0	0.24889	0.0436925	0	0	0	0.0682078	0	0	0	-0.00625361	0	0	0
O_it2C3	Galb1-4GlcNAcb1-3Galb1-4GlcNAcb1-3GalNAc?	0.0113123	0	0	0.546996	0.000470998	0	0	0	0	0	0.427973	0	0	0	0	0	0	0.00603862	0.0201585	0.0846146	0	0.0830394	0	0	0.296427	0	0	0	0	0.00108012	0.86253	0.271527	0	-0.00951218	0	0.24889	0.0436925	0	0	0	0.0682078	0	0	0	-0.00625361	0	0	0.15562
O_It1C3	Galb1-4GlcNAcb1-6(Galb1-4GlcNAcb1-3)Galb1-3GlcNAcb1-3GalNAc?	0.0113123	0	0	0.546996	0.000470998	0	0	0	0	0	0.427973	0	0	0	0	0	0	0	0	0.0846146	0	0.0830394	0	0	0	0	0	0	0	0.00108012	0.86253	0.271527	0	0	0	0.24889	0.0436925	0	0	0	0.0682078	0	0	0	-0.00625361	0	0	0
O_It2C3	Galb1-4GlcNAcb1-6(Galb1-4GlcNAcb1-3)Galb1-4GlcNAcb1-3GalNAc?	0.0113123	0	0	0.546996	0.000470998	0	0	0	0	0	0.427973	0	0	0	0	0	0	0	0.0201585	0.0846146	0	0.0830394	0	0	0	0	0	0	0	0.00108012	0.86253	0.271527	0	0	0	0.24889	0.0436925	0	0	0	0.0682078	0	0	0	-0.00625361	0	0	0
O_Sdat1C3	GalNAcb1-4(Neu5Aca2-3)Galb1-3GlcNAcb1-3GalNAc?	0	0	0	0.546996	0	0	0	0	0	0	-0.0107342	0	0	0	0.629725	0	0.0294549	0.0918287	0	0	0	0	0	0	0	0	0	0	0	0.00108012	0.86253	0.131101	0	0	0	0	0	0	0	0	0.0456664	0	0	0	-0.00625361	0	0	0
O_Sdat2C3	GalNAcb1-4(Neu5Aca2-3)Galb1-4GlcNAcb1-3GalNAc?	0	0	0	0.546996	0	0	0	0	0	0	-0.0107342	0	0	0	0.629725	0	0.0294549	0.0918287	0	0	0	0	0	0	0	0	0	0	0	0.00108012	0.86253	0.131101	0	0	0	0	0	0	0	0	0.0456664	0	0	0	-0.00625361	0	0	0
O_LeaC3	Galb1-3(Fuca1-4)GlcNAcb1-3GalNAc?	0	0.574576	0	0.546996	0	0	0	0	0	0	0.0743912	0	0	0	0	0	0	0	0	0	0	0	0	0	0	0	0	0	0	-1.08751e-05	0.86253	0	0	0	0	0	0	0	0	0	0.0442844	0	0	0.594858	-0.00625361	0	0	0
O_LexC3	Galb1-4(Fuca1-3)GlcNAcb1-3GalNAc?	0	0.700474	0	0.546996	0	0	0	0	0	0	0.325826	0	0	0	0	0	0	0	0	0	0	0	0	0	0	0	0	0	0	-1.08751e-05	0.86253	0	0	0	0	0	-0.00212759	0	0	0	0.0442844	0	0	0.0982208	-0.00625361	0	0	0
O_LebC3	Fuca1-2Galb1-3(Fuca1-4)GlcNAcb1-3GalNAc?	0	0.547755	0	0.546996	0	0	0	0	0	0	0	0	0	0	0	0	0	0	0	0	0	0	0	0	0	0	0	0	0	0.00108012	0.1091	0	0	0	0	0	0	0	0	0	0.0125056	0	0	0.172979	-0.00625361	0	0	0
O_LeyC3	Fuca1-2Galb1-4(Fuca1-3)GlcNAcb1-3GalNAc?	0	0.622587	0	0.546996	0	0	0	0	0	0	0	0	0	0	0	0	0	0	0	0	0	0	0	0	0	0	0	0	0	0.00108012	0.1091	0	0	0	0	0.379041	0	0	0	0	0.0125056	0	0	0.0982208	-0.00625361	0	0	0
O_s3LeaC3	Neu5Aca2-3Galb1-3(Fuca1-4)GlcNAcb1-3GalNAc?	0	0.558742	0	0.546996	0	0	0	0	0	0	0	0	0	0	0	0	0	0	0	0	0	0	0	0	0	0	0	0	0	0.00108012	0.1091	0	0	0	0	0	0	0	0	0	0.0125056	0	0	1	-0.00625361	0	0	0
O_s3LexC3	Neu5Aca2-3Galb1-4(Fuca1-3)GlcNAcb1-3GalNAc?	0	0.200749	0	0.546996	0	0	0	0	0	0	0	0	0	0	0	0	0	0	0	0	0	0	0	0	0	0	0	0	0	0.00108012	0.1091	0	0	0	0	0.32503	0	0	0	0	0.0125056	0	0	0.0982208	-0.00625361	0	0	0
O_s6LeaC3	Neu5Aca2-6Galb1-3(Fuca1-4)GlcNAcb1-3GalNAc?	0	0.558742	0	0	0	0	0	0	0	0	0	0	0	0	0	0	0	0	0	0	0	0	0	0	0	0	0	0	0	0.00108012	0.1091	0	0	0	0	0	0	0	0	0	0.0125056	0	0	1	-0.00625361	0	0	0
O_s6LexC3	Neu5Aca2-6Galb1-4(Fuca1-3)GlcNAcb1-3GalNAc?	0	0.700474	0	0	0	0	0	0	0	0	0	0	0	0	0	0	0	0	0	0	0	0	0	0	0	0	0	0	0	0.00108012	0.1091	0	0	0	0	0.32503	0	0	0	0	0.0125056	0	0	0.0982208	-0.00625361	0	0	0
O_C4_Unsub	GlcNAcb1-3(GlcNAcb1-6)GalNAc?	0	0	0	0	0	0	0	0	0	0	0	0	0	0	0	0	0	0	0	0	0	0	0	0	0	0	0	0	0	0	0	0	0	0	0	0	0	0	0	0	0	0	0	0	0	0	0	0
O_disC4	Neu5Aca2-3Galb1-4GlcNAcb1-3(Neu5Aca2-3Galb1-4GlcNAcb1-6)GalNAc?	0	0	0	0.546996	0	0	0	0	0	0	0	0	0	0	0	0	0	0	0	0	0	0	0	0	0	0	0	0	0	0	0	0	0	0	0	0	0.146725	0	0	0	0	0	0	0	0	0	0	0
O_diHt1C4	Fuca1-2Galb1-3GlcNAcb1-3(Fuca1-2Galb1-3GlcNAcb1-6)GalNAc?	0	0.296256	0	0.546996	0	0	0	0	0	0	0	0	0	0	0	0	0	0	0	0	0	0	0	0.0048392	0	0	0	0	0	0	0	0	0	0	0	0	0	0	0	0	0	0	0	0.172979	0	0	0	0
O_diHt2C4	Fuca1-2Galb1-4GlcNAcb1-3(Fuca1-2Galb1-4GlcNAcb1-6)GalNAc?	0	0.603894	0	0.546996	0	0	0	0	0	0	0	0	0	0.00616978	0	0	0	0	0	0.0342479	0.351182	0	0	0	0	0	0	0	0.720337	0	0	0	0	0	0	0	0	0	0	0.357817	0	0	0	0.326389	0	0	0	0
O_diAt1C4	GalNAca1-3(Fuca1-2)Galb1-3GlcNAcb1-3(GalNAca1-3(Fuca1-2)Galb1-3GlcNAcb1-6)GalNAc?	0	-0.0123315	0	0.546996	0	0	0	0	0	0	0	0	0	-0.00494243	0.880239	0	-0.000233866	0.184081	0	0	0	0	0	0.00156524	0	0	0	0	0.176502	0	0	0.175499	0	0	0	0	0	0	0	0	0	0	0	0.087846	0	0	0	0
O_diAt2C4	GalNAca1-3(Fuca1-2)Galb1-4GlcNAcb1-3(GalNAca1-3(Fuca1-2)Galb1-4GlcNAcb1-6)GalNAc?	0	0.0587359	0	0.546996	0	0	0	0	0	0	0	0	0	-0.00494243	0.880239	0	-0.000233866	0.184081	0	0	0	0	0	0	0	0	0	0	0.0390336	0	0	0.0576367	0	0	0	0	0	0	0	0	0	0	0	0.087846	0	0	0	0
O_diBt1C4	Gala1-3(Fuca1-2)Galb1-3GlcNAcb1-3(Gala1-3(Fuca1-2)Galb1-3GlcNAcb1-6)GalNAc?	0	-0.0123315	0	0.546996	0	0	0	0	0	0	0	0	0	-0.00494243	0	0	0	0	0	0	0.76067	0	0	0.0048392	0	0	0	0	0	0	0	0	0	0	0	0	0	0	0	0.502953	0	0	0	0.0498039	0.0535384	0	0	0
O_diBt2C4	Gala1-3(Fuca1-2)Galb1-4GlcNAcb1-3(Gala1-3(Fuca1-2)Galb1-4GlcNAcb1-6)GalNAc?	0	0.0587359	0	0.546996	0	0	0	0	0	0	0	0	0	-0.00494243	0	0	0	0	0	0	1	0	0	0	0	0	0	0	0	0	0	0	0	0	0	0	0	0	0	0.502953	0	0	0	0.0595036	0.0535384	0	0	0
O_dilBt1C4	Gala1-3Galb1-3GlcNAcb1-3(Gala1-3Galb1-3GlcNAcb1-6)GalNAc?	0	0	0	0.546996	0	0	0	0	0	0	0	0	0	0	0	0	0	0	0	0	0	0	0	0.0048392	0	0	0	0	0	0	0	0	0	0	0	0	0	0	0	0.307456	0	0	0	0	0.205529	0	0	0
O_dilBt2C4	Gala1-3Galb1-4GlcNAcb1-3(Gala1-3Galb1-4GlcNAcb1-6)GalNAc?	0	0	0	0.546996	0	0	0	0	0	0	0	0	0	0	0	0	0	0	0.0201585	0	0	0	0	0	0	0	0.293749	0	0	0	0	0	0	0	0	0	0	0	0	0.307456	0	0	0	0	0.698239	0	0	0
O_diit1C4	Galb1-4GlcNAcb1-3Galb1-3GlcNAcb1-3(Galb1-4GlcNAcb1-3Galb1-3GlcNAcb1-6)GalNAc?	0.0113123	0	0.181053	0.546996	0.000470998	0	0	0	0	0	0.427973	0	0	0	0	0	0	0	0	0.0846146	0	0.0830394	0	0.0048392	0.296427	0	0	0	0	0	0	0.271527	0	0	0	0.752124	0.0436925	0	0	0	-0.00080532	0	0	0	0	0	0	0
O_diit2C4	Galb1-4GlcNAcb1-3Galb1-4GlcNAcb1-3(Galb1-4GlcNAcb1-3Galb1-4GlcNAcb1-6)GalNAc?	0.0113123	0	0.181053	0.546996	0.000470998	0	0	0	0	0	0.427973	0	0	0	0	0	0	0.00603862	0.0201585	0.0846146	0	0.0830394	0	0	0.296427	0	0	0	0	0	-0.00230486	0.271527	0	-0.00951218	0	0.752124	0.0436925	0	0	0	-0.00080532	0	0	0	0	0	0	0.15562
O_diIt1C4	Galb1-4GlcNAcb1-6(Galb1-4GlcNAcb1-3)Galb1-3GlcNAcb1-3(Galb1-4GlcNAcb1-6(Galb1-4GlcNAcb1-3)Galb1-3GlcNAcb1-6)GalNAc?	0.0113123	0	0.181053	0.546996	0.000470998	0	0	0	0	0	0.427973	0	0	0	0	0	0	0	0	0.0846146	0	0.0830394	0	0	0	0	0	0	0	0	0	0.271527	0	0	0	0.752124	0.0436925	0	0	0	-0.00080532	0	0	0	0	0	0	0
O_diIt2C4	Galb1-4GlcNAcb1-6(Galb1-4GlcNAcb1-3)Galb1-4GlcNAcb1-3(Galb1-4GlcNAcb1-6(Galb1-4GlcNAcb1-3)Galb1-4GlcNAcb1-6)GalNAc?	0.0113123	0	0.181053	0.546996	0.000470998	0	0	0	0	0	0.427973	0	0	0	0	0	0	0	0.0201585	0.0846146	0	0.0830394	0	0	0	0	0	0	0	0	0	0.271527	0	0	0	0.752124	0.0436925	0	0	0	-0.00080532	0	0	0	0	0	0	0
O_diSdat1C4	GalNAcb1-4(Neu5Aca2-3)Galb1-3GlcNAcb1-3(GalNAcb1-4(Neu5Aca2-3)Galb1-3GlcNAcb1-6)GalNAc?	0	0	0.181053	0.546996	0	0	0	0	0	0	-0.0107342	0	0	0	0.629725	0	0.0294549	0.0918287	0	0	0	0	0	0	0	0	0	0	0	0	0	0.131101	0	0	0	0	0	0	0	0	0	0	0	0	0	0	0	0
O_diSdat2C4	GalNAcb1-4(Neu5Aca2-3)Galb1-4GlcNAcb1-3(GalNAcb1-4(Neu5Aca2-3)Galb1-4GlcNAcb1-6)GalNAc?	0	0	0.181053	0.546996	0	0	0	0	0	0	-0.0107342	0	0	0	0.629725	0	0.0294549	0.0918287	0	0	0	0	0	0	0	0	0	0	0	0	0	0.131101	0	0	0	0	0	0	0	0	0	0	0	0	0	0	0	0
O_diLeaC4	Galb1-3(Fuca1-4)GlcNAcb1-3(Galb1-3(Fuca1-4)GlcNAcb1-6)GalNAc?	0	0.574576	0	0.546996	0	0	0	0	0	0	0.0743912	0	0	0	0	0	0	0	0	0	0	0	0	0	0	0	0	0	0	0	0	0	0	0	0	0	0	0	0	0	0	0	0	0.594858	0	0	0	0
O_diLexC4	Galb1-4(Fuca1-3)GlcNAcb1-3(Galb1-4(Fuca1-3)GlcNAcb1-6)GalNAc?	0	0.700474	0	0.546996	0	0	0	0	0	0	0.325826	0	0	0	0	0	0	0	0	0	0	0	0	0	0	0	0	0	0	0	0	0	0	0	0	0	-0.00212759	0	0	0	0	0	0	0.0982208	0	0	0	0
O_diLebC4	Fuca1-2Galb1-3(Fuca1-4)GlcNAcb1-3(Fuca1-2Galb1-3(Fuca1-4)GlcNAcb1-6)GalNAc?	0	0.547755	0	0.546996	0	0	0	0	0	0	0	0	0	0	0	0	0	0	0	0	0	0	0	0	0	0	0	0	0	0	0	0	0	0	0	0	0	0	0	0	0	0	0	0.172979	0	0	0	0
O_diLeyC4	Fuca1-2Galb1-4(Fuca1-3)GlcNAcb1-3(Fuca1-2Galb1-4(Fuca1-3)GlcNAcb1-6)GalNAc?	0	0.622587	0	0.546996	0	0	0	0	0	0	0	0	0	0	0	0	0	0	0	0	0	0	0	0	0	0	0	0	0	0	0	0	0	0	0	0.379041	0	0	0	0.357817	0	0	0	0.0982208	0	0	0	0
O_dis4LeaC4	Neu5Aca2-3Galb1-3(Fuca1-4)GlcNAcb1-3(Neu5Aca2-3Galb1-3(Fuca1-4)GlcNAcb1-6)GalNAc?	0	0.558742	0	0.546996	0	0	0	0	0	0	0	0	0	0	0	0	0	0	0	0	0	0	0	0	0	0	0	0	0	0	0	0	0	0	0	0	0	0	0	0	0	0	0	1	0	0	0	0
O_dis4LexC4	Neu5Aca2-3Galb1-4(Fuca1-3)GlcNAcb1-3(Neu5Aca2-3Galb1-4(Fuca1-3)GlcNAcb1-6)GalNAc?	0	0.200749	0	0.546996	0	0	0	0	0	0	0	0	0	0	0	0	0	0	0	0	0	0	0	0	0	0	0	0	0	0	0	0	0	0	0	0.32503	0	0	0	0	0	0	0	0.0982208	0	0	0	0
O_dis6LeaC4	Neu5Aca2-6Galb1-3(Fuca1-4)GlcNAcb1-3(Neu5Aca2-6Galb1-3(Fuca1-4)GlcNAcb1-6)GalNAc?	0	0.558742	0	0	0	0	0	0	0	0	0	0	0	0	0	0	0	0	0	0	0	0	0	0	0	0	0	0	0	0	0	0	0	0	0	0	0	0	0	0	0	0	0	1	0	0	0	0
O_dis6LexC4	Neu5Aca2-6Galb1-4(Fuca1-3)GlcNAcb1-3(Neu5Aca2-6Galb1-4(Fuca1-3)GlcNAcb1-6)GalNAc?	0	0.700474	0	0	0	0	0	0	0	0	0	0	0	0	0	0	0	0	0	0	0	0	0	0	0	0	0	0	0	0	0	0	0	0	0	0.32503	0	0	0	0	0	0	0	0.0982208	0	0	0	0
O_C5_Unsub	GalNAca1-3GalNAc?	0	0	0	0	0	0	0	0	0	0	0	0	0	0	0.157712	0	-0.000507351	1	0	0	0	0	0	0	0	0	0.0438802	0	0.757339	-1.08751e-05	0.694752	0	0	0	0	0	0	0	0	0	0.0442844	0	0	0	0.190792	0	0	0
O_C6_Unsub	GlcNAcb1-6GalNAc?	1	0	0	0	0	0	0	0	0	0	0	0	0	0	0	0	0	0	0	0	0	0	0	0	0	0	0	0	0	0	0	0	0	0	0	0	0	0	0	0	0	0	0	0	0	0	0	0
O_sC6	Neu5Aca2-3Galb1-4GlcNAcb1-6GalNAc?	0	0	0	0.546996	0	0	0	0	0	0	0	0	0	0	0	0	0	0	0	0	0	0	0	0	0	0	0	0	0	0	0	0	0	0	0	0	0.146725	0	0	0	0	0	0	0	0	0	0	0
O_Ht1C6	Fuca1-2Galb1-3GlcNAcb1-6GalNAc?	0	0.296256	0	0.546996	0	0	0	0	0	0	0	0	0	0	0	0	0	0	0	0	0	0	0	0.0048392	0	0	0	0	0	0	0	0	0	0	0	0	0	0	0	0	0	0	0	0.172979	0	0	0	0
O_Ht2C6	Fuca1-2Galb1-4GlcNAcb1-6GalNAc?	0	0.603894	0	0.546996	0	0	0	0	0	0	0	0	0	0.00616978	0	0	0	0	0	0.0342479	0.351182	0	0	0	0	0	0	0	0	0	0	0	0	0	0	0	0	0	0	0.357817	0	0	0	0.326389	0	0	0	0
O_At1C6	GalNAca1-3(Fuca1-2)Galb1-3GlcNAcb1-6GalNAc?	0	-0.0123315	0	0.546996	0	0	0	0	0	0	0	0	0	-0.00494243	0.880239	0	-0.000233866	0.184081	0	0	0	0	0	0.00156524	0	0	0	0	0.176502	0	0	0.175499	0	0	0	0	0	0	0	0	0	0	0	0.087846	0	0	0	0
O_At2C6	GalNAca1-3(Fuca1-2)Galb1-4GlcNAcb1-6GalNAc?	0	0.0587359	0	0.546996	0	0	0	0	0	0	0	0	0	-0.00494243	0.880239	0	-0.000233866	0.184081	0	0	0	0	0	0	0	0	0	0	0.0390336	0	0	0.0576367	0	0	0	0	0	0	0	0	0	0	0	0.087846	0	0	0	0
O_Bt1C6	Gala1-3(Fuca1-2)Galb1-3GlcNAcb1-6GalNAc?	0	-0.0123315	0	0.546996	0	0	0	0	0	0	0	0	0	-0.00494243	0	0	0	0	0	0	0.76067	0	0	0.0048392	0	0	0	0	0	0	0	0	0	0	0	0	0	0	0	0.502953	0	0	0	0.0498039	0.0535384	0	0	0
O_Bt2C6	Gala1-3(Fuca1-2)Galb1-4GlcNAcb1-6GalNAc?	0	0.0587359	0	0.546996	0	0	0	0	0	0	0	0	0	-0.00494243	0	0	0	0	0	0	1	0	0	0	0	0	0	0	0	0	0	0	0	0	0	0	0	0	0	0.502953	0	0	0	0.0595036	0.0535384	0	0	0
O_lBt1C6	Gala1-3Galb1-3GlcNAcb1-6GalNAc?	0	0	0	0.546996	0	0	0	0	0	0	0	0	0	0	0	0	0	0	0	0	0	0	0	0.0048392	0	0	0	0	0	0	0	0	0	0	0	0	0	0	0	0.307456	0	0	0	0	0.205529	0	0	0
O_lBt2C6	Gala1-3Galb1-4GlcNAcb1-6GalNAc?	0	0	0	0.546996	0	0	0	0	0	0	0	0	0	0	0	0	0	0	0.0201585	0	0	0	0	0	0	0	0.293749	0	0	0	0	0	0	0	0	0	0	0	0	0.307456	0	0	0	0	0.698239	0	0	0
O_it1C6	Galb1-4GlcNAcb1-3Galb1-3GlcNAcb1-6GalNAc?	0.0113123	0	0	0.546996	-0.00218949	0	0	0	0	0	0.427973	0	0	0	0	0	0	0	0	0.0846146	0	0.0830394	0	0.0048392	0.296427	0	0	0	0	0	0	0.271527	0	0	0	0.24889	0.0436925	0	0	0	0	0	0	0	0	0	0	0
O_it2C6	Galb1-4GlcNAcb1-3Galb1-4GlcNAcb1-6GalNAc?	0.0113123	0	0	0.546996	-0.00218949	0	0	0	0	0	0.427973	0	0	0	0	0	0	0.00603862	0.0201585	0.0846146	0	0.0830394	0	0	0.296427	0	0	0	0	0	-0.00230486	0.271527	0	-0.00951218	0	0.24889	0.0436925	0	0	0	0	0	0	0	0	0	0	0.15562
O_It1C6	Galb1-4GlcNAcb1-6(Galb1-4GlcNAcb1-3)Galb1-3GlcNAcb1-6GalNAc?	0.0113123	0	0	0.546996	-0.00218949	0	0	0	0	0	0.427973	0	0	0	0	0	0	0	0	0.0846146	0	0.0830394	0	0	0	0	0	0	0	0	0	0.271527	0	0	0	0.24889	0.0436925	0	0	0	0	0	0	0	0	0	0	0
O_It2C6	Galb1-4GlcNAcb1-6(Galb1-4GlcNAcb1-3)Galb1-4GlcNAcb1-6GalNAc?	0.0113123	0	0	0.546996	-0.00218949	0	0	0	0	0	0.427973	0	0	0	0	0	0	0	0.0201585	0.0846146	0	0.0830394	0	0	0	0	0	0	0	0	0	0.271527	0	0	0	0.24889	0.0436925	0	0	0	0	0	0	0	0	0	0	0
O_Sdat1C6	GalNAcb1-4(Neu5Aca2-3)Galb1-3GlcNAcb1-6GalNAc?	0	0	0	0.546996	0	0	0	0	0	0	-0.0107342	0	0	0	0.629725	0	0.0294549	0.0918287	0	0	0	0	0	0	0	0	0	0	0	0	0	0.131101	0	0	0	0	0	0	0	0	0	0	0	0	0	0	0	0
O_Sdat2C6	GalNAcb1-4(Neu5Aca2-3)Galb1-4GlcNAcb1-6GalNAc?	0	0	0	0.546996	0	0	0	0	0	0	-0.0107342	0	0	0	0.629725	0	0.0294549	0.0918287	0	0	0	0	0	0	0	0	0	0	0	0	0	0.131101	0	0	0	0	0	0	0	0	0	0	0	0	0	0	0	0
O_LeaC6	Galb1-3(Fuca1-4)GlcNAcb1-6GalNAc?	0	0.574576	0	0.546996	0	0	0	0	0	0	0.0743912	0	0	0	0	0	0	0	0	0	0	0	0	0	0	0	0	0	0	0	0	0	0	0	0	0	0	0	0	0	0	0	0	0.594858	0	0	0	0
O_LexC6	Galb1-4(Fuca1-3)GlcNAcb1-6GalNAc?	0	0.700474	0	0.546996	0	0	0	0	0	0	0.325826	0	0	0	0	0	0	0	0	0	0	0	0	0	0	0	0	0	0	0	0	0	0	0	0	0	-0.00212759	0	0	0	0	0	0	0.0982208	0	0	0	0
O_LebC6	Fuca1-2Galb1-3(Fuca1-4)GlcNAcb1-6GalNAc?	0	0.547755	0	0.546996	0	0	0	0	0	0	0	0	0	0	0	0	0	0	0	0	0	0	0	0	0	0	0	0	0	0	0	0	0	0	0	0	0	0	0	0	0	0	0	0.172979	0	0	0	0
O_LeyC6	Fuca1-2Galb1-4(Fuca1-3)GlcNAcb1-6GalNAc?	0	0.622587	0	0.546996	0	0	0	0	0	0	0	0	0	0	0	0	0	0	0	0	0	0	0	0	0	0	0	0	0	0	0	0	0	0	0	0.379041	0	0	0	0.357817	0	0	0	0.0982208	0	0	0	0
O_s3LeaC6	Neu5Aca2-3Galb1-3(Fuca1-4)GlcNAcb1-6GalNAc?	0	0.558742	0	0.546996	0	0	0	0	0	0	0	0	0	0	0	0	0	0	0	0	0	0	0	0	0	0	0	0	0	0	0	0	0	0	0	0	0	0	0	0	0	0	0	1	0	0	0	0
O_s3LexC6	Neu5Aca2-3Galb1-4(Fuca1-3)GlcNAcb1-6GalNAc?	0	0.200749	0	0.546996	0	0	0	0	0	0	0	0	0	0	0	0	0	0	0	0	0	0	0	0	0	0	0	0	0	0	0	0	0	0	0	0.32503	0	0	0	0	0	0	0	0.0982208	0	0	0	0
O_s6LeaC6	Neu5Aca2-6Galb1-3(Fuca1-4)GlcNAcb1-6GalNAc?	0	0.558742	0	0	0	0	0	0	0	0	0	0	0	0	0	0	0	0	0	0	0	0	0	0	0	0	0	0	0	0	0	0	0	0	0	0	0	0	0	0	0	0	0	1	0	0	0	0
O_s6LexC6	Neu5Aca2-6Galb1-4(Fuca1-3)GlcNAcb1-6GalNAc?	0	0.700474	0	0	0	0	0	0	0	0	0	0	0	0	0	0	0	0	0	0	0	0	0	0	0	0	0	0	0	0	0	0	0	0	0	0.32503	0	0	0	0	0	0	0	0.0982208	0	0	0	0
O_C7_Unsub	GalNAca1-6GalNAc?	0	0	0	0	0	0	0	0	0	0	0	0	0	0	0.157712	0	-0.000507351	0.184081	0	0	0	0	0	0	0	0	0.0438802	0	0.757339	0	0	0	0	0	0	0	0	0	0	0	0	0	0	0	0	0	0	0
O_C8_Unsub	Gala1-3GalNAc?	0	0	0	0	0	0	0	0	0	0	0	0	0	0	0	0	0	0	0	0	0	0	0	0	0	0	0	0	0	-1.08751e-05	0.694752	0	0	0	0	0	0	0	0	0.297271	0.0442844	0	0	0	0.190792	0	0	0
[truncated: 20 more columns]

## Sheet: FigureS3c
Lectins with negative value were changed to 1 and highligted	Spike spot 1	Spike spot 2	Spike after beta-elimination spot 1	Spike after beta-elimination spot 2	Fold change spot 1	Fold change spot 2	Average Fold change for Replicate 1	p-value in paired T-test for Replicate 1		Lectins with negative value were changed to 1 and highligted	Spike spot 1	Spike spot 2	Spike after beta-elimination spot 1	Spike after beta-elimination spot 2	Fold change spot 1	Fold change spot 2	Average Fold change for Replicate 2	p-value in paired T-test for Replicate 2		Lectins with negative value were changed to 1 and highligted	Spike spot 1	Spike spot 2	Spike after beta-elimination spot 1	Spike after beta-elimination spot 2	Fold change spot 1	Fold change spot 2	Average Fold change for Replicate 3	p-value in paired T-test for Replicate 3		Lectins	p-value in T-test Replicate 1	p-value in T-test Replicate 2	p-value in T-test Replicate 3	Average fold change in Replicate 1	Average fold change in Replicate 2	Average fold change in Replicate 3	Average average Fold change
AAA	8.50715	0.887584	4.93726	4.2826	1.72305	0.207254	0.965152	0.984019		AAA	9.32758	24.3934	12.1125	18.2443	0.77008	1.33704	1.05356	0.77073		WFA	97.3505	191.244	22.8613	2.05331	4.2583	93.1397	48.699	0.261214		CGL2	0.0766747	0.057225	0.239256	3.04473	4.40096	1.06599	2.83722
AAL	82.6136	56.6006	34.6427	28.587	2.38474	1.97994	2.18234	0.163516		AAL	128.052	169.475	33.2886	50.7037	3.84672	3.34247	3.5946	0.0712775		GAL7-S	36.4272	26.6262	55.3772	1	0.657802	26.6262	13.642	0.905357		Con A	0.0124438	0.0490323	0.216626	5.32412	3.62451	1.17038	3.373
ABA	15.6351	6.04923	4.55537	1	3.43224	6.04923	4.74073	0.227783		ABA	25.9031	24.2702	16.8248	22.4737	1.53958	1.07994	1.30976	0.375628		PA-IL	1	37.7993	1	3.11765	1	12.1243	6.56214	0.5		LENTIL	0.0204378	0.0758833	0.0707651	5.67172	3.60361	1.64373	3.63969
ABL	70.324	44.7206	50.0818	9.62902	1.40418	4.64435	3.02427	0.166911		ABL	150.574	257.514	27.6982	46.6353	5.43622	5.52186	5.47904	0.164126		VVA	163.292	401.104	78.2341	62.9873	2.08722	6.36802	4.22762	0.343105		MNA-G	0.0672052	0.0197689	0.0610655	3.38	2.60678	0.52422	2.17033
ACG	38.8216	20.2642	116.639	10.7474	0.332834	1.8855	1.10917	0.577471		ACG	83.4553	85.8276	34.9277	51.9476	2.38937	1.6522	2.02078	0.111987		SNA-II	124.323	55.6372	51.1198	16.6349	2.43199	3.34461	2.8883	0.18835		MNA-M	0.0487916	0.0141497	0.502898	6.22051	2.05986	0.887974	3.05611
ACL	93.7562	101.949	95.3628	23.8407	0.983153	4.27627	2.62971	0.513093		ACL	236.147	171.832	28.1665	45.0548	8.38396	3.81386	6.09891	0.1515		PALa	231.546	509.19	155.852	184.802	1.48568	2.75533	2.12051	0.354059		ORYSATA	0.039374	0.0068931	0.923748	7.24175	3.92332	1.1152	4.09342
AMA	77.411	70.283	286.252	21.4948	0.270429	3.26977	1.7701	0.646103		AMA	116.56	104.375	36.4789	40.0351	3.19527	2.60708	2.90118	0.0691163		GAL3C-S	45.8754	51.2072	15.4375	46.0907	2.97169	1.11101	2.04135	0.393979		PA-IIL	0.0809964	0.0783152	0.612941	6.101	5.88837	0.922219	4.30386
ASA	87.7343	89.6187	158.565	43.0442	0.553301	2.08202	1.31766	0.870297		ASA	164.222	141.454	66.8163	58.2404	2.45782	2.4288	2.44331	0.0499205		DISCOIDIN II	253.422	234.839	119.957	135.177	2.11262	1.73728	1.92495	0.0916692		PSA	0.031532	0.0922495	0.320517	3.82322	3.98685	0.683587	2.83122
BANLEC	177.817	101.212	93.126	49.6181	1.90943	2.03982	1.97462	0.15167		BANLEC	250.104	237.426	75.9336	74.9384	3.29372	3.16828	3.231	0.0220836		ABL	741.24	666.634	344.029	412.972	2.15459	1.61424	1.88441	0.138193		PTL-2	0.0555744	0.00167669	0.0734347	7.79366	2.94267	1.70104	4.14579
BC2L-A	139.596	230.622	24.6045	9.43808	5.67362	24.4352	15.0544	0.194782		BC2L-A	6.43149	137.588	86.1923	58.8844	0.0746178	2.33657	1.2056	0.995751		UDA	840.152	781.267	432.37	440.778	1.94313	1.77247	1.8578	0.0570984		AAA	0.984019	0.77073	0.0617181	0.965152	1.05356	0.305495	0.774736
BC2LCN	1.17434	3.87806	1	2.94599	1.17434	1.31639	1.24536	0.382282		BC2LCN	30.8788	22.1752	17.7321	19.1078	1.74141	1.16053	1.45097	0.354075		MOA	332.575	316.972	262.792	132.33	1.26555	2.39532	1.83043	0.269962		AAL	0.163516	0.0712775	0.361838	2.18234	3.5946	1.5406	2.43918
BPA	1	1	1	1.60938	1	0.621356	0.810678	0.5		BPA	1	1	12.5369	14.4101	0.0797646	0.0693957	0.0745802	0.0477129		RCA 120	932.83	1058.28	632.866	541.625	1.47398	1.9539	1.71394	0.165125		ABA	0.227783	0.375628	0.0941194	4.74073	1.30976	0.645251	2.23191
CA	162.332	279.903	25.6683	69.1217	6.32423	4.04943	5.18683	0.133799		CA	153.408	152.931	61.4015	57.1575	2.49845	2.6756	2.58702	0.0127675		PTL-2	549.139	553.295	349.936	301.88	1.56926	1.83283	1.70104	0.0734347		ABL	0.166911	0.164126	0.138193	3.02427	5.47904	1.88441	3.46257
CAA	52.5859	147.831	27.7414	42.9078	1.89558	3.44531	2.67044	0.351982		CAA	119.287	102.804	27.1275	29.2056	4.39726	3.52	3.95863	0.0709917		STL	202.339	109.504	98.8558	82.9172	2.04681	1.32064	1.68373	0.339905		ACG	0.577471	0.111987	0.0570571	1.10917	2.02078	1.06506	1.39834
CALSEPA	164.79	266.425	44.3535	45.6083	3.71538	5.8416	4.77849	0.182126		CALSEPA	237.457	216.599	84.5679	93.4511	2.80788	2.31778	2.56283	0.0683282		LENTIL	464.968	486.334	299.991	279.902	1.54994	1.73752	1.64373	0.0707651		ACL	0.513093	0.1515	0.658701	2.62971	6.09891	1.14884	3.29249
CGL2	71.512	78.558	18.1124	36.6885	3.94824	2.14122	3.04473	0.0766747		CGL2	111.892	93.7611	25.2543	21.4493	4.43064	4.37129	4.40096	0.057225		GS-II	616.217	656.245	414.382	366.859	1.48708	1.78882	1.63795	0.112286		AMA	0.646103	0.0691163	0.357978	1.7701	2.90118	1.08388	1.91839
CNL	14.6929	20.592	1	1.44572	14.6929	14.2434	14.4682	0.104762		CNL	36.7789	23.5154	9.99049	48.3914	3.68139	0.485941	2.08366	0.976447		ASA	722.186	819.922	458.446	509.162	1.57529	1.61034	1.59281	0.051988		ASA	0.870297	0.0499205	0.051988	1.31766	2.44331	1.59281	1.78459
Con A	100.966	120.875	14.8663	31.3421	6.79159	3.85665	5.32412	0.0124438		Con A	154.687	125.972	45.6987	32.6008	3.38493	3.86409	3.62451	0.0490323		RCA 60	990.578	460.028	525.234	356.588	1.88597	1.29008	1.58803	0.360751		BANLEC	0.15167	0.0220836	0.342217	1.97462	3.231	1.1613	2.12231
CPA	10.2687	18.4208	1	22.2586	10.2687	0.827581	5.54812	0.749918		CPA	41.123	79.2652	14.3955	6.20015	2.85666	12.7844	7.82053	0.276747		AAL	675.298	440.504	356.987	370.318	1.89166	1.18953	1.5406	0.361838		BC2L-A	0.194782	0.995751	0.133315	15.0544	1.2056	1.36812	5.87605
CSA	0.0273103	1	4.74632	12.5477	0.00575399	0.0796957	0.0427248	0.253028		CSA	25.5488	26.8428	16.7663	10.21	1.52382	2.62907	2.07644	0.19072		LSL-N	205.828	312.816	130.733	208.191	1.57442	1.50255	1.53848	0.103677		BC2LCN	0.382282	0.354075	0.0617106	1.24536	1.45097	0.313559	1.0033
DBA	9.85901	38.0842	17.2941	16.3393	0.570081	2.33083	1.45045	0.709741		DBA	38.1653	31.264	16.6492	14.776	2.29232	2.11587	2.20409	0.0837414		DSA	760.136	867.869	559.719	510.386	1.35807	1.70042	1.52924	0.174706		BPA	0.5	0.0477129	0.387755	0.810678	0.0745802	0.104007	0.329755
DISCOIDIN I	1	1	1.66394	2.3186	0.600984	0.431294	0.516139	0.203044		DISCOIDIN I	18.971	22.3908	25.7372	16.0638	0.737102	1.39387	1.06548	0.978651		WGA	96.7624	249.345	112.373	114.582	0.861082	2.17613	1.51861	0.573417		CA	0.133799	0.0127675	0.00251268	5.18683	2.58702	0.877897	2.88392
DISCOIDIN II	45.2941	36.8552	4.25532	8.51064	10.6441	4.33049	7.4873	0.1152		DISCOIDIN II	55.4802	76.4769	29.9373	29.03	1.85321	2.63441	2.24381	0.185604		TL	530.047	643.7	517.517	329.367	1.02421	1.95435	1.48928	0.474638		CAA	0.351982	0.0709917	0.856732	2.67044	3.95863	0.915799	2.51496
DSA	52.7088	32.0213	88.407	133.824	0.596207	0.239279	0.417743	0.285293		DSA	73.4884	165.655	293.578	195.395	0.25032	0.847796	0.549058	0.414494		CSA	66.3008	154	87.7068	69.3201	0.755937	2.22158	1.48876	0.657627		CALSEPA	0.182126	0.0683282	0.915552	4.77849	2.56283	1.00081	2.78071
ECA	1	1	2.0731	1.74577	0.482368	0.572813	0.52759	0.113355		ECA	14.2417	29.8467	20.3078	27.3909	0.701292	1.08966	0.895475	0.74489		PHA-E	584.384	613.865	407.81	417.948	1.43298	1.46876	1.45087	0.0330302		CNL	0.104762	0.976447	0.301347	14.4682	2.08366	0.651105	5.73431
EEL	1.3382	5.35281	5.34643	3.32788	0.250299	1.60848	0.929388	0.797808		EEL	72.7028	20.4036	17.2053	20.1615	4.2256	1.01201	2.61881	0.497222		UEA I	58.3423	213.904	100.16	93.5075	0.582493	2.28756	1.43503	0.712818		CPA	0.749918	0.276747	0.0908882	5.54812	7.82053	1.33835	4.90233
F17AG	0.0273103	0.191172	0.600109	1	0.0455089	0.191172	0.11834	0.107717		F17AG	43.5878	33.6517	14.0003	11.3076	3.11334	2.97603	3.04468	0.0882255		BC2L-A	788.873	858.774	614.905	590.904	1.28292	1.45332	1.36812	0.133315		CSA	0.253028	0.19072	0.657627	0.0427248	2.07644	1.48876	1.20264
GAL1	1	1	0.627387	1	1.59391	1	1.29696	0.5		GAL1	16.0749	13.8104	16.0345	61.8844	1.00252	0.223164	0.61284	0.500534		CPA	116.482	165.801	79.0589	137.784	1.47336	1.20334	1.33835	0.0908882		DBA	0.709741	0.0837414	0.0750936	1.45045	2.20409	0.522764	1.39244
GAL1-S	117.475	79.746	24.8227	50.6001	4.73257	1.576	3.15429	0.305976		GAL1-S	86.0895	81.1754	25.9567	22.8981	3.31665	3.54507	3.43086	0.00997513		RS-FUC	313.679	341.357	288.576	217.664	1.08699	1.56828	1.32763	0.372532		DISCOIDIN I	0.203044	0.978651	0.386764	0.516139	1.06548	0.308686	0.630103
GAL2	3.34551	1	1.58211	8.97436	2.11459	0.111429	1.11301	0.638549		GAL2	12.1004	5.84611	53.572	12.6247	0.225872	0.463069	0.344471	0.396856		HMA	36.192	38.309	35.394	26.3205	1.02254	1.45548	1.23901	0.45769		DISCOIDIN II	0.1152	0.185604	0.0916692	7.4873	2.24381	1.92495	3.88535
GAL3	116.205	147.667	25.7774	31.5876	4.50803	4.67484	4.59143	0.0786748		GAL3	141.177	100.724	37.035	48.728	3.81198	2.06707	2.93952	0.205199		SNA-I	175.014	169.839	195.339	111.069	0.895949	1.52913	1.21254	0.711974		DSA	0.285293	0.414494	0.174706	0.417743	0.549058	1.52924	0.832014
GAL3C-S	55.4945	66.719	52.4823	43.4261	1.05739	1.53638	1.29689	0.418127		GAL3C-S	119.533	55.4956	22.8396	26.3226	5.2336	2.10829	3.67094	0.313457		Con A	322.774	242.21	265.799	215.029	1.21436	1.1264	1.17038	0.216626		ECA	0.113355	0.74489	0.101268	0.52759	0.895475	0.14563	0.522898
GAL7-S	12.235	10.8831	0.272777	31.8331	44.8535	0.341882	22.5977	0.830289		GAL7-S	23.7002	1.47115	13.2833	13.6052	1.78422	0.108132	0.946175	0.95162		GAL3	221.706	198.928	198.532	162.557	1.11673	1.22374	1.17024	0.138853		EEL	0.797808	0.497222	0.0135231	0.929388	2.61881	0.18211	1.24343
GAL9	12.1531	4.32868	3.16421	22.4768	3.84079	0.192584	2.01669	0.792772		GAL9	42.8946	29.2151	17.5126	22.8689	2.44935	1.27751	1.86343	0.344023		GAL1-S	176.072	206.299	243.714	128.205	0.722456	1.60913	1.16579	0.954419		F17AG	0.107717	0.0882255	0.06449	0.11834	3.04468	0.307714	1.15691
GHA	1.37917	5.55764	5.15548	8.45608	0.267515	0.657236	0.462375	0.0832512		GHA	13.0401	2.65732	20.659	19.3419	0.631207	0.137387	0.384297	0.227295		NPA	963.331	685.217	712.958	702.634	1.35117	0.975211	1.16319	0.544216		GAL1	0.5	0.500534	0.154875	1.29696	0.61284	0.231814	0.71387
GNA	415.99	420.128	197.681	192.99	2.10435	2.17694	2.14065	0.0126169		GNA	208.942	182.6	153.906	208.244	1.3576	0.876857	1.11723	0.777587		BANLEC	683.061	837.368	639.971	667.085	1.06733	1.25526	1.1613	0.342217		GAL1-S	0.305976	0.00997513	0.954419	3.15429	3.43086	1.16579	2.58365
GRFT	138.122	101.744	24.2226	29.078	5.70219	3.49902	4.6006	0.138473		GRFT	144.905	98.9217	47.7182	61.7527	3.03668	1.6019	2.31929	0.267452		ACL	653.03	473.671	470.872	520.045	1.38685	0.910827	1.14884	0.658701		GAL2	0.638549	0.396856	0.0962796	1.11301	0.344471	0.102899	0.520127
GS-I	1	1	0.981997	3.92799	1.01833	0.254583	0.636458	0.503914		GS-I	21.8517	27.9673	14.4101	28.3861	1.51641	0.985249	1.25083	0.535783		ORYSATA	250.874	245.738	307.388	173.759	0.816146	1.41424	1.1152	0.923748		GAL3	0.0786748	0.205199	0.138853	4.59143	2.93952	1.17024	2.9004
GS-II	370.437	335.083	106.792	107.474	3.46876	3.11781	3.29328	0.0466147		GS-II	217.769	277.155	200.341	202.8	1.08699	1.36664	1.22682	0.353429		LcH A	149.649	172.466	257.018	106.732	0.58225	1.61588	1.09906	0.849731		GAL3C-S	0.418127	0.313457	0.393979	1.29689	3.67094	2.04135	2.33639
HAA	5.35281	8.75294	1	3.27332	5.35281	2.67402	4.01342	0.0726404		HAA	32.4963	52.769	20.9225	22.6786	1.55318	2.32682	1.94	0.266238		AMA	377.543	533.105	363.666	471.937	1.03816	1.12961	1.08388	0.357978		GAL7-S	0.830289	0.95162	0.905357	22.5977	0.946175	13.642	12.3953
HHA	408.084	522.377	116.421	126.023	3.50524	4.1451	3.82517	0.0961335		HHA	207.387	276.739	91.4608	103.081	2.26749	2.68468	2.47609	0.125276		CGL2	267.653	221.706	259.014	201.805	1.03336	1.09862	1.06599	0.239256		GAL9	0.792772	0.344023	0.177755	2.01669	1.86343	0.0206483	1.30025
HMA	33.4141	2.6491	1	0.0545554	33.4141	48.5579	40.986	0.449151		HMA	33.1587	47.4544	9.14169	8.76119	3.6272	5.41643	4.52182	0.146354		ACG	409.533	182.659	392.217	168.198	1.04415	1.08597	1.06506	0.0570571		GHA	0.0832512	0.227295	0.123625	0.462375	0.384297	0.039246	0.295306
IRA	9.0397	1.01048	9.81997	0.572831	0.920543	1.76401	1.34228	0.825422		IRA	1	8.51113	12.2442	14.3662	0.0816713	0.592441	0.337056	0.194368		HHA	436.349	457.284	439.793	429.469	0.992168	1.06477	1.02847	0.578439		GNA	0.0126169	0.777587	0.104202	2.14065	1.11723	0.951691	1.40319
Jacalin	1	1	1.88216	14.0207	0.531304	0.071323	0.301314	0.456935		Jacalin	1	4.38265	20.5712	16.0784	0.0486116	0.27258	0.160596	0.157082		CALSEPA	326.46	311.719	280.966	371.223	1.16192	0.839708	1.00081	0.915552		GRFT	0.138473	0.267452	0.84328	4.6006	2.31929	0.984829	2.63491
LAL	2.5262	2.32137	29.1871	22.9678	0.0865519	0.101071	0.0938113	0.0805056		LAL	8.66518	5.46099	14.9516	12.7125	0.579549	0.429576	0.504563	0.0453076		GRFT	185.129	211.944	253.612	170.965	0.729967	1.23969	0.984829	0.84328		GS-I	0.503914	0.535783	0.0370069	0.636458	1.25083	0.0675778	0.651622
LBA	1	1	15.9574	3.21877	0.0626667	0.310678	0.186672	0.406248		LBA	1	13.872	7.47335	6.53674	0.133809	2.12216	1.12798	0.960316		MALECTIN	150.041	139.613	138.875	157.076	1.0804	0.888823	0.984611	0.862153		GS-II	0.0466147	0.353429	0.112286	3.29328	1.22682	1.63795	2.05268
LcH A	113.624	164.094	13.9389	11.8658	8.15161	13.8291	10.9904	0.130905		LcH A	123.292	132.982	27.7129	17.0736	4.44891	7.78873	6.11882	0.0610067		GNA	642.484	599.281	679.405	625.735	0.945657	0.957724	0.951691	0.104202		HAA	0.0726404	0.266238	0.0523379	4.01342	1.94	0.0948631	2.01609
LEA	9.77708	9.36743	23.5134	17.4577	0.415809	0.536578	0.476194	0.161145		LEA	10.56	10.144	25.5323	12.9759	0.413592	0.781758	0.597675	0.380995		PA-IIL	158.391	180.385	196.829	173.493	0.804715	1.03972	0.922219	0.612941		HHA	0.0961335	0.125276	0.578439	3.82517	2.47609	1.02847	2.44324
LENTIL	256.594	238.774	46.072	41.353	5.56941	5.77404	5.67172	0.0204378		LENTIL	187.006	216.83	58.8551	53.8062	3.1774	4.02983	3.60361	0.0758833		CAA	127.616	304.152	238.445	234.614	0.535201	1.2964	0.915799	0.856732		HMA	0.449151	0.146354	0.45769	40.986	4.52182	1.23901	15.5823
Lotus	0.232137	1.13338	76.132	1	0.00304914	1.13338	0.568213	0.501119		Lotus	8.37249	1.27089	12.654	6.8587	0.661649	0.185296	0.423473	0.083778		PHA-P	393.695	357.47	463.954	368.588	0.848564	0.969835	0.9092	0.400085		IRA	0.825422	0.194368	0.162029	1.34228	0.337056	0.0330151	0.570783
LPA	22.886	26.1223	8.21058	2.75505	2.78738	9.48161	6.1345	0.142997		LPA	1	1	12.9906	13.8686	0.076979	0.0721052	0.0745421	0.0224772		PHA-L	245.66	303.917	313.189	301.747	0.784382	1.00719	0.895786	0.520449		Jacalin	0.456935	0.157082	0.444906	0.301314	0.160596	0.313283	0.258397
LSL-N	90.479	169.829	8.9198	7.39225	10.1436	22.9739	16.5588	0.203765		LSL-N	95.7021	147.154	20.3517	19.7078	4.70241	7.46679	6.0846	0.160078		SAMB	212.807	204.848	218.249	253.772	0.975063	0.807214	0.891139	0.42947		LAL	0.0805056	0.0453076	0.021222	0.0938113	0.504563	0.0954908	0.231288
MAA	114.034	91.3392	32.8696	41.9258	3.46929	2.17859	2.82394	0.151852		MAA	182.046	123.138	80.6898	66.0553	2.25612	1.86417	2.06014	0.173469		MNA-M	462.968	321.324	462.544	414.595	1.00092	0.775031	0.887974	0.502898		LBA	0.406248	0.960316	0.000431264	0.186672	1.12798	0.0484508	0.454368
MALECTIN	121.49	63.9334	10.3655	24.5772	11.7206	2.60133	7.16095	0.283308		MALECTIN	87.137	97.489	21.142	15.7126	4.12152	6.20452	5.16302	0.0677317		CA	425.489	379.973	481.117	436.042	0.884378	0.871415	0.877897	0.00251268		LcH A	0.130905	0.0610067	0.849731	10.9904	6.11882	1.09906	6.06942
MNA-G	63.9334	63.1141	25.0409	15.0027	2.55316	4.20684	3.38	0.0672052		MNA-G	98.9371	103.636	38.44	39.2595	2.57381	2.63976	2.60678	0.0197689		MAA	259.538	231.546	320.719	311.007	0.809237	0.744505	0.776871	0.0822817		LEA	0.161145	0.380995	0.212829	0.476194	0.597675	0.455524	0.509798
MNA-M	338.402	307.637	47.3541	58.1015	7.1462	5.29482	6.22051	0.0487916		MNA-M	184.603	195.417	89.0314	95.4999	2.07346	2.04625	2.05986	0.0141497		PSA	326.107	394.244	606.284	475.396	0.537878	0.829295	0.683587	0.320517		Lotus	0.501119	0.083778	0.257637	0.568213	0.423473	0.121827	0.371171
MOA	121.654	58.3211	53.9825	43.9716	2.25357	1.32633	1.78995	0.366977		MOA	120.103	122.044	41.8937	25.6933	2.86686	4.75004	3.80845	0.0659248		CNL	50.2663	87.9807	106.333	106.067	0.472726	0.829484	0.651105	0.301347		LPA	0.142997	0.0224772	0.109948	6.1345	0.0745421	0.0313411	2.08013
MPL	25.4668	37.3878	3.98254	3.84615	6.39462	9.72082	8.05772	0.137326		MPL	35.1922	31.2332	16.6931	13.9418	2.10819	2.24025	2.17422	0.0214744		PNA	35.6431	16.6683	70.3579	20.9987	0.506597	0.793777	0.650187	0.420994		LSL-N	0.203765	0.160078	0.103677	16.5588	6.0846	1.53848	8.06061
NPA	629.461	420.947	201.609	197.954	3.12218	2.12649	2.62433	0.194132		NPA	206.216	301.402	100.637	89.2363	2.04911	3.37757	2.71334	0.206043		ABA	93.038	86.3341	135.23	143.292	0.687998	0.602503	0.645251	0.0941194		MAA	0.151852	0.173469	0.0822817	2.82394	2.06014	0.776871	1.88698
ORYSATA	116.492	133.738	15.4119	19.3126	7.55858	6.92493	7.24175	0.039374		ORYSATA	148.279	157.09	35.9082	42.2596	4.12938	3.71727	3.92332	0.0068931		PTL-1	159.567	135.967	277.906	222.799	0.574178	0.610265	0.592221	0.0970006		MALECTIN	0.283308	0.0677317	0.862153	7.16095	5.16302	0.984611	4.43619
PA-IIL	33.0864	37.101	7.96508	4.60993	4.15393	8.04807	6.101	0.0809964		PA-IIL	86.5979	112.308	14.3077	19.62	6.05255	5.72418	5.88837	0.0783152		PPL	1.06505	1	4.34166	1.06878	0.245309	0.935643	0.590476	0.486638		MOA	0.366977	0.0659248	0.269962	1.78995	3.80845	1.83043	2.47628
PA-IL	1	1	1	1	1	1	1	#DIV/0!		PA-IL	7.74089	1	15.4638	7.2831	0.500582	0.137304	0.318943	0.0652144		SBA	336.653	266.556	560.757	570.841	0.600354	0.466952	0.533653	0.0958739		MPL	0.137326	0.0214744	0.130675	8.05772	2.17422	0.441728	3.55789
PALa	192.196	160.161	18.4943	32.6787	10.3922	4.90109	7.64664	0.0969386		PALa	159.724	134.368	48.0402	56.4697	3.3248	2.37947	2.85214	0.112274		MNA-G	106.955	57.2054	171.152	135.07	0.624916	0.423523	0.52422	0.0610655		NPA	0.194132	0.206043	0.544216	2.62433	2.71334	1.16319	2.16696
PHA-E	323.122	326.44	88.3252	121.249	3.65832	2.6923	3.17531	0.0427726		PHA-E	231.526	151.19	101.485	91.7388	2.28137	1.64805	1.96471	0.227015		DBA	183.325	123.029	304.754	277.108	0.601551	0.443976	0.522764	0.0750936		PA-IL	#DIV/0!	0.0652144	0.5	1	0.318943	6.56214	2.62703
PHA-L	245.902	249.015	142.035	95.4719	1.73128	2.60826	2.16977	0.121366		PHA-L	201.471	156.474	140.545	136.637	1.4335	1.14518	1.28934	0.29962		RPA	139.573	108.092	262.393	220.005	0.531925	0.491317	0.511621	0.029559		PALa	0.0969386	0.112274	0.354059	7.64664	2.85214	2.12051	4.20643
PHA-P	205.879	300.468	85.3519	78.0415	2.41211	3.8501	3.13111	0.183866		PHA-P	176.515	146.338	108.466	154.477	1.62738	0.94731	1.28734	0.575786		LEA	143.415	150.472	266.251	404.058	0.538647	0.372402	0.455524	0.212829		PHA-E	0.0427726	0.227015	0.0330302	3.17531	1.96471	1.45087	2.19696
PNA	5.43475	1	5.21004	2.53682	1.04313	0.394194	0.718662	0.592429		PNA	7.94115	1	18.5663	18.0834	0.427719	0.0552994	0.241509	0.145779		MPL	50.7367	70.77	145.075	132.596	0.349727	0.533728	0.441728	0.130675		PHA-L	0.121366	0.29962	0.520449	2.16977	1.28934	0.895786	1.45163
PPL	1	1	1.28205	3.02782	0.78	0.33027	0.555135	0.412017		PPL	1	1	18.9468	16.8102	0.0527794	0.0594878	0.0561336	0.040241		VFA	9.92519	15.8058	31.2431	43.084	0.317676	0.366861	0.342269	0.0776928		PHA-P	0.183866	0.575786	0.400085	3.13111	1.28734	0.9092	1.77588
PSA	180.316	203.912	45.6356	55.1828	3.95122	3.69522	3.82322	0.031532		PSA	227.752	183.894	51.1281	52.2549	4.45453	3.51918	3.98685	0.0922495		BC2LCN	18.6677	6.12238	41.7003	34.1168	0.447664	0.179454	0.313559	0.0617106		PNA	0.592429	0.145779	0.420994	0.718662	0.241509	0.650187	0.536786
PSL1A	0.191172	1	29.9782	3.13693	0.00637704	0.318783	0.16258	0.454407		PSL1A	9.52784	6.61634	14.5125	12.7857	0.656525	0.517481	0.587003	0.0673605		Jacalin	1	1	1.86705	10.9938	0.535606	0.0909601	0.313283	0.444906		PPL	0.412017	0.040241	0.486638	0.555135	0.0561336	0.590476	0.400582
PTL-1	135.746	90.2741	19.9945	19.5035	6.78914	4.6286	5.70887	0.150648		PTL-1	115.158	93.3605	13.0345	11.1905	8.83491	8.34283	8.58887	0.0686604		DISCOIDIN I	0.320167	1	4.84722	1.81383	0.0660517	0.55132	0.308686	0.386764		PSL1A	0.454407	0.0673605	0.0181783	0.16258	0.587003	0.0204334	0.256672
PTL-2	246.148	295.265	30.9056	38.7343	7.96449	7.62283	7.79366	0.0555744		PTL-2	188.608	181.599	66.187	59.821	2.84963	3.03571	2.94267	0.00167669		F17AG	51.1288	59.44	163.142	196.803	0.313399	0.302029	0.307714	0.06449		PTL-1	0.150648	0.0686604	0.0970006	5.70887	8.58887	0.592221	4.96332
PWA	1	1	1	6.81942	1	0.14664	0.57332	0.5		PWA	40.0755	1.17846	18.2004	12.5515	2.2019	0.0938901	1.14789	0.805227		AAA	22.3137	20.0791	66.1537	73.3647	0.337301	0.273688	0.305495	0.0617181		PWA	0.5	0.805227	0.058448	0.57332	1.14789	0.145159	0.622124
RCA 120	13.7917	15.1435	41.8985	22.5859	0.329169	0.670486	0.499828	0.335212		RCA 120	358.692	288.462	132.745	133.813	2.70212	2.15571	2.42891	0.117894		UEA-II	19.491	32.3108	108.834	75.2539	0.179089	0.429357	0.304223	0.214762		RCA 120	0.335212	0.117894	0.165125	0.499828	2.42891	1.71394	1.54756
RCA 60	183.634	154.303	41.4621	43.5625	4.42897	3.54211	3.98554	0.0787145		RCA 60	196.095	164.762	30.5666	45.3914	6.41533	3.6298	5.02257	0.102254		SSA	1	26.2341	116.524	53.7807	0.00858192	0.487798	0.24819	0.350982		RCA 60	0.0787145	0.102254	0.360751	3.98554	5.02257	1.58803	3.53205
RPA	75.6085	30.1779	10.0382	16.9667	7.53209	1.77865	4.65537	0.373428		RPA	32.789	15.1198	33.4057	26.8641	0.98154	0.562825	0.772183	0.466604		GAL1	12.395	1	28.9281	28.4492	0.428478	0.0351504	0.231814	0.154875		RPA	0.373428	0.466604	0.029559	4.65537	0.772183	0.511621	1.97972
RS-FUC	276.298	160.366	38.216	24.8227	7.2299	6.46046	6.84518	0.170517		RS-FUC	116.021	119.626	31.5764	17.7614	3.6743	6.73515	5.20472	0.0593508		EEL	50.2271	49.9134	279.955	270.083	0.179411	0.184808	0.18211	0.0135231		RS-FUC	0.170517	0.0593508	0.372532	6.84518	5.20472	1.32763	4.45918
SAMB	33.1274	18.9533	14.1026	13.066	2.34903	1.45058	1.89981	0.308945		SAMB	51.0745	37.9496	33.435	26.1177	1.52758	1.45302	1.4903	0.123864		VRA	27.0574	40.8573	277.294	200.155	0.0975766	0.204128	0.150852	0.139107		SAMB	0.308945	0.123864	0.42947	1.89981	1.4903	0.891139	1.42708
SBA	144.389	145.045	17.8396	20.4855	8.09376	7.08035	7.58706	0.00504624		SBA	165.794	84.626	33.1569	23.1908	5.00028	3.64912	4.3247	0.223858		ECA	9.37633	19.2166	111.176	92.8689	0.0843379	0.206922	0.14563	0.101268		SBA	0.00504624	0.223858	0.0958739	7.58706	4.3247	0.533653	4.14847
SHA	1	1	0.872886	8.78342	1.14563	0.113851	0.629738	0.510396		SHA	1	1	13.1076	14.9516	0.0762914	0.0668825	0.071587	0.0449722		PWA	25.5284	10.1604	134.645	100.878	0.189599	0.10072	0.145159	0.058448		SHA	0.510396	0.0449722	0.08838	0.629738	0.071587	0.0430858	0.248137
SJA	1	1	3.90071	8.37425	0.256364	0.119414	0.187889	0.261416		SJA	1	1.11685	7.00505	9.68316	0.142754	0.115339	0.129047	0.11077		Lotus	6.63204	0.398576	32.1744	10.6213	0.206128	0.037526	0.121827	0.257637		SJA	0.261416	0.11077	0.0381966	0.187889	0.129047	0.0973549	0.138097
SNA-I	55.8222	31.2839	12.8478	13.0933	4.34489	2.38931	3.3671	0.245084		SNA-I	77.1856	62.5048	22.8981	11.7905	3.37082	5.30127	4.33605	0.0216555		BPA	1	1	5.80514	27.9702	0.172261	0.0357523	0.104007	0.387755		SNA-I	0.245084	0.0216555	0.711974	3.3671	4.33605	1.21254	2.9719
SNA-II	0.273103	1	10.2564	18.0306	0.0266275	0.0554614	0.0410445	0.162457		SNA-II	1	1	7.72214	6.52211	0.129498	0.153325	0.141411	0.0621949		GAL2	1.65311	0.516188	10.1424	12.0582	0.162991	0.0428081	0.102899	0.0962796		SNA-II	0.162457	0.0621949	0.18835	0.0410445	0.141411	2.8883	1.02359
SSA	1	1	5.81015	16.3121	0.172113	0.0613043	0.116709	0.306226		SSA	7.89494	1	6.18552	8.48313	1.27636	0.117881	0.69712	0.642974		SJA	1	1	9.74323	10.8608	0.102635	0.0920743	0.0973549	0.0381966		SSA	0.306226	0.642974	0.350982	0.116709	0.69712	0.24819	0.354006
STL	1.17434	1.09241	17.7032	2.94599	0.0663349	0.370813	0.218574	0.428905		STL	12.6396	1	11.8344	8.849	1.06804	0.113007	0.590522	0.565078		LAL	9.49394	9.29792	95.6362	101.384	0.0992714	0.0917102	0.0954908	0.021222		STL	0.428905	0.565078	0.339905	0.218574	0.590522	1.68373	0.83094
TL	209.483	404.643	109.083	189.553	1.9204	2.13472	2.02756	0.221975		TL	188.916	158.476	66.6992	45.5231	2.83236	3.48123	3.1568	0.0250643		HAA	11.2581	29.2136	223.917	209.495	0.0502782	0.139448	0.0948631	0.0523379		TL	0.221975	0.0250643	0.474638	2.02756	3.1568	1.48928	2.22455
UDA	84.5799	73.888	28.4506	35.9247	2.97287	2.05674	2.51481	0.121416		UDA	145.413	131.965	21.3469	16.2833	6.81193	8.1043	7.45811	0.0222557		GS-I	2.20197	1.73152	27.9702	30.6843	0.0787255	0.0564301	0.0675778	0.0370069		UDA	0.121416	0.0222557	0.0570984	2.51481	7.45811	1.8578	3.94357
UEA I	8.83488	11.2109	15.4392	14.048	0.572238	0.79804	0.685139	0.24169		UEA I	21.6206	5.63044	11.5125	18.0395	1.87801	0.312118	1.09507	0.935172		LBA	1	1	20.6262	20.6528	0.048482	0.0484196	0.0484508	0.000431264		UEA I	0.24169	0.935172	0.712818	0.685139	1.09507	1.43503	1.07174
UEA-II	1	1.99365	4.39171	1.33661	0.227702	1.49158	0.859639	0.621817		UEA-II	1	1	13.8247	18.1273	0.0723342	0.0551655	0.0637498	0.0908278		SHA	2.94685	10.1212	181.316	144.756	0.0162525	0.0699191	0.0430858	0.08838		UEA-II	0.621817	0.0908278	0.214762	0.859639	0.0637498	0.304223	0.409204
VFA	1	1	1	1.06383	1	0.94	0.97	0.5		VFA	1	1	6.37577	13.0784	0.156844	0.0764621	0.116653	0.233416		GHA	1	1.30027	36.8043	25.3359	0.0271707	0.0513212	0.039246	0.123625		VFA	0.5	0.233416	0.0776928	0.97	0.116653	0.342269	0.476307
VRA	1	16.0448	0.981997	1	1.01833	16.0448	8.53156	0.499238		VRA	1	1	8.05873	11.2783	0.124089	0.0886657	0.106377	0.116892		IRA	1	1.5355	53.5944	32.4139	0.0186587	0.0473716	0.0330151	0.162029		VRA	0.499238	0.116892	0.139107	8.53156	0.106377	0.150852	2.9296
VVA	46.5231	47.9568	32.0786	155.865	1.45029	0.307683	0.878984	0.584714		VVA	66.0941	78.2485	53.5281	63.0259	1.23475	1.24153	1.23814	0.060676		LPA	8.55304	11.1013	261.302	370.664	0.0327324	0.0299498	0.0313411	0.109948		VVA	0.584714	0.060676	0.343105	0.878984	1.23814	4.22762	2.11492
VVA-M	1	1	10.611	11.8658	0.0942416	0.0842759	0.0892588	0.0389619		VVA-M	15.9978	4.76777	9.7856	9.3612	1.63483	0.509312	1.07207	0.905331		VVA-M	0.751413	1.6139	69.4266	41.8599	0.0108231	0.0385549	0.024689	0.162536		VVA-M	0.0389619	0.905331	0.162536	0.0892588	1.07207	0.024689	0.39534
WFA	24.4017	50.9064	6.30115	2.75505	3.87259	18.4775	11.175	0.271091		WFA	39.3823	71.4858	13.0784	13.0491	3.01125	5.47822	4.24473	0.230736		GAL9	1	2.5548	132.862	75.653	0.00752662	0.03377	0.0206483	0.177755		WFA	0.271091	0.230736	0.261214	11.175	4.24473	48.699	21.3729
WGA	47.0146	64.5069	14.0753	15.1118	3.34023	4.26863	3.80443	0.125583		WGA	61.9965	97.5969	18.2883	30.9764	3.38996	3.15069	3.27032	0.130356		PSL1A	1	1	47.6074	50.3481	0.0210051	0.0198617	0.0204334	0.0181783		WGA	0.125583	0.130356	0.573417	3.80443	3.27032	1.51861	2.86445

## Sheet: FigureS4c
Lectins with negative value were changed to 1 and highligted	Spike spot 1	Spike spot 2	Spike plus D-mannose spot 1	Spike plus D-mannose spot 2	Fold change spot 1	Fold change spot 2	Average Fold change for Replicate 1	p-value in paired T-test for Replicate 1		Lectins with negative value were changed to 1 and highligted	Spike spot 1	Spike spot 2	Spike plus D-mannose spot 1	Spike plus D-mannose spot 2	Fold change spot 1	Fold change spot 2	Average Fold change for Replicate 2	p-value in paired T-test for Replicate 2		Lectins with negative value were changed to 1 and highligted	Spike spot 1	Spike spot 2	Spike plus D-mannose spot 1	Spike plus D-mannose spot 2	Fold change spot 1	Fold change spot 2	Average Fold change for Replicate 3	p-value in paired T-test for Replicate 3		Lectins	Ttest	ttest	ttest	Avg Fc	Avg Fc	Avg Fc	avg Fc
AAA	27.9704	25.1535	1	3.42163	27.9704	7.35131	17.6608	0.0682142		AAA	76.7637	11.4174	1	1	76.7637	11.4174	44.0906	0.413011		AAA	104.143	1	44.0171	46.7999	2.36597	0.0213676	1.19367	0.914418		GS-II	0.0177429	0.00797441	0.106649	1.58965	3.55876	1.93004	2.35948
AAL	174.233	297.309	187.969	74.3929	0.926921	3.99647	2.4617	0.53918		AAL	170.019	89.7331	135.956	68.8251	1.25054	1.30378	1.27716	0.149535		AAL	1187.11	626.02	541.056	144.196	2.19405	4.34147	3.26776	0.0920489		PSA	0.0308199	0.0500421	0.0423208	2.40246	2.35152	642.881	215.878
ABA	50.3973	38.6963	87.638	17.66	0.575062	2.19118	1.38312	0.827343		ABA	107.817	37.0053	112.805	34.4278	0.95579	1.07487	1.01533	0.803685		ABA	62.4437	30.8315	123.175	48.9832	0.506951	0.629429	0.56819	0.315104		SBA	0.0310306	0.80364	0.130483	0.313909	1.01121	1.53411	0.953078
ABL	93.3008	193.518	360.486	252.208	0.25882	0.767295	0.513057	0.362346		ABL	159.762	89.2203	164.372	148.387	0.971956	0.601268	0.786612	0.450501		ABL	1013.85	646.743	943.482	507.321	1.07458	1.27482	1.1747	0.202436		GAL7-S	0.0534427	0.223039	0.13791	18.3821	0.421425	0.190654	6.33139
ACG	115.836	163.073	103.974	115.563	1.11409	1.41112	1.26261	0.344232		ACG	141.246	89.9356	144.57	116.12	0.97701	0.774505	0.875757	0.419622		ACG	758.547	457.365	740.086	352.986	1.02494	1.2957	1.16032	0.388556		GRFT	0.0655599	0.644084	0.099234	2.22825	1.00657	3.29973	2.17819
ACL	211.394	325.695	537.417	433.664	0.393352	0.75103	0.572191	0.296407		ACL	192.679	146.51	158.664	119.72	1.21438	1.22376	1.21907	0.075298		ACL	858.364	460.657	769.369	572.651	1.11567	0.804429	0.960051	0.927469		AAA	0.0682142	0.413011	0.914418	17.6608	44.0906	1.19367	20.9817
AMA	159.498	165.023	105.96	146.137	1.50526	1.12924	1.31725	0.284095		AMA	137.319	86.8315	140.878	58.024	0.974734	1.49648	1.23561	0.578262		AMA	903.651	826.667	483.304	403.889	1.86974	2.04677	1.95825	0.00183575		MPL	0.0689472	0.0539324	0.379791	41.794	3.2117	4.71069	16.5721
ASA	396.334	266.215	204.857	208.168	1.93469	1.27885	1.60677	0.312612		ASA	155.268	90.9477	163.221	100.215	0.951275	0.90753	0.929402	0.0484805		ASA	916.228	749.894	757.852	550.303	1.20898	1.36269	1.28584	0.0729773		MNA-G	0.0695542	0.128918	0.145777	4.17272	14.5482	4.82097	7.84729
BANLEC	813.127	365.999	64.2384	60.0442	12.658	6.09549	9.37673	0.253087		BANLEC	189.116	136.361	165.295	134.054	1.14411	1.01721	1.08066	0.43853		BANLEC	1256.53	1413.96	955.041	541.741	1.31569	2.61004	1.96286	0.28813		GNA	0.0725051	0.947008	0.562418	0.796648	1.0314	0.927612	0.918555
BC2L-A	365.349	265.89	7.28477	1	50.1524	265.89	158.021	0.0945168		BC2L-A	96.6024	74.1456	9.95424	21.553	9.70466	3.44016	6.57241	0.152707		BC2L-A	1324.91	1245.6	106.265	15.6761	12.468	79.459	45.9635	0.00293369		DBA	0.0755449	0.190718	0.696877	17.3458	0.190513	2.95736	6.83123
BC2LCN	16.0527	8.5771	53.2009	0.993377	0.301738	8.63428	4.46801	0.628203		BC2LCN	1	1	7.85781	5.63605	0.127262	0.177429	0.152346	0.121559		BC2LCN	79.2839	49.2755	163.418	32.2868	0.485161	1.52618	1.00567	0.626843		Jacalin	0.0886634	0.400181	0.130624	0.122824	0.168842	0.87117	0.387612
BPA	1	1	1	1	1	1	1	#DIV/0!		BPA	1	1	12.0507	2.12681	0.082983	0.470187	0.276585	0.435309		BPA	122.967	72.4465	128.355	40.1213	0.958021	1.80569	1.38185	0.605151		BC2L-A	0.0945168	0.152707	0.00293369	158.021	6.57241	45.9635	70.1857
CA	364.482	318.87	395.254	333.554	0.922146	0.955976	0.939061	0.21655		CA	94.5106	78.1268	117.328	60.6901	0.805526	1.28731	1.04642	0.915408		CA	773.066	845.196	883.075	863.896	0.875424	0.978354	0.926889	0.392807		DSA	0.104445	0.596396	0.0117419	0.625464	1.52473	1.22706	1.12575
CAA	119.845	154.623	159.603	290.618	0.750894	0.532047	0.641471	0.318932		CAA	67.978	56.9115	104.818	58.8557	0.648536	0.966967	0.807751	0.466434		CAA	573.769	450.612	444.773	484.502	1.29003	0.930051	1.11004	0.66356		VVA	0.109265	0.894945	0.0587415	0.682758	0.968765	1.7472	1.13291
CALSEPA	235.988	300.56	231.678	458.72	1.0186	0.655215	0.836909	0.517344		CALSEPA	88.64	59.8941	97.97	77.8375	0.904766	0.769476	0.837121	0.194743		CALSEPA	692.537	743.986	794.37	682.162	0.871806	1.09063	0.981217	0.847357		LENTIL	0.110377	0.295661	0.0310346	1.24679	0.763972	324.517	108.843
CGL2	94.6009	107.71	196.909	285.872	0.480429	0.376778	0.428603	0.168151		CGL2	97.7901	48.9085	62.1029	58.4569	1.57465	0.836659	1.20565	0.666434		CGL2	579.593	646.152	590.803	601.506	0.981027	1.07422	1.02763	0.656597		LcH A	0.1119	0.0279909	0.0173146	2.13741	2.40425	2.05571	2.19912
CNL	40.1047	61.2315	44.5916	74.6137	0.899378	0.820647	0.860013	0.294048		CNL	23.1722	7.62509	32.5706	22.0201	0.711445	0.346279	0.528862	0.131774		CNL	116.045	152.089	77.7952	101.641	1.49168	1.49634	1.49401	0.0870039		RCA 60	0.113982	0.634569	0.256731	0.0937071	1.17881	0.836577	0.703033
Con A	232.304	185.5	100.773	207.174	2.30523	0.895382	1.60031	0.60397		Con A	96.0221	97.7631	50.846	81.586	1.88849	1.19828	1.54339	0.28109		Con A	659.954	602.891	59.0011	99.9715	11.1855	6.03063	8.60804	0.0563891		ORYSATA	0.142004	0.0539781	0.00562363	4.31863	7.3398	328.278	113.312
CPA	97.9596	55.5977	52.3179	42.8256	1.87239	1.29823	1.58531	0.326295		CPA	12.6995	9.21758	13.623	14.3636	0.93221	0.641734	0.786972	0.386955		CPA	93.0008	37.0357	20.4709	16.2326	4.54307	2.28156	3.41232	0.322178		MALECTIN	0.163433	0.290451	0.138155	1.85738	2.3984	321.251	108.502
CSA	19.9531	26.5619	19.5364	21.1921	1.02133	1.25339	1.13736	0.450706		CSA	5.61422	5.46577	49.775	32.4567	0.112792	0.168402	0.140597	0.150743		CSA	32.3931	59.7425	71.1595	118.295	0.455218	0.505032	0.480125	0.12769		HMA	0.163833	0.0609096	0.210915	1.23821	0.158705	0.100451	0.499121
DBA	28.8371	27.4287	7.94702	0.883002	3.62867	31.063	17.3458	0.0755449		DBA	9.66294	3.25247	42.9616	20.8352	0.224921	0.156105	0.190513	0.190718		DBA	25.9356	165.848	69.3614	29.9322	0.373919	5.5408	2.95736	0.696877		CGL2	0.168151	0.666434	0.656597	0.428603	1.20565	1.02763	0.887294
DISCOIDIN I	2.07656	1	1.65563	1	1.25424	1	1.12712	0.5		DISCOIDIN I	4.23766	0.0944701	20.3794	26.532	0.207938	0.00356061	0.105749	0.151037		DISCOIDIN I	1	14.3289	58.5301	46.9283	0.0170852	0.305337	0.161211	0.1718		LEA	0.173305	0.321789	0.892121	0.142998	0.737963	1.02818	0.636381
DISCOIDIN II	25.0451	71.199	27.0419	52.8698	0.926159	1.34669	1.13642	0.569081		DISCOIDIN II	39.8934	18.1653	34.2569	18.8185	1.16454	0.965288	1.06491	0.573451		DISCOIDIN II	377.553	416.383	474.185	435.912	0.796216	0.955201	0.875708	0.373053		PWA	0.177059	0.0585849	0.645829	0.0803261	0.228604	1.10029	0.469739
DSA	207.71	159.498	298.896	286.865	0.694925	0.556003	0.625464	0.104445		DSA	83.3361	57.5998	38.6662	64.4158	2.15527	0.894187	1.52473	0.596396		DSA	808.181	910.235	647.228	755.112	1.24868	1.20543	1.22706	0.0117419		GAL1-S	0.183679	0.212323	0.0930117	0.947024	2.72854	5.99363	3.22307
ECA	2.29325	23.9617	4.30464	1	0.532739	23.9617	12.2472	0.555624		ECA	1	1	4.37136	0.315224	0.228762	3.17235	1.70056	0.627572		ECA	50.2462	111.825	48.2983	53.0503	1.04033	2.1079	1.57412	0.478908		MAA	0.197229	0.685739	0.275679	0.0647265	0.794267	0.805282	0.554759
EEL	9.98555	36.4211	16.0044	11.479	0.623925	3.17284	1.89838	0.650743		EEL	1	10.7426	58.8557	4.40554	0.0169907	2.43843	1.22771	0.569454		EEL	19.4358	7.44935	2.01927	18.5872	9.62521	0.400778	5.01299	0.862209		GHA	0.203072	0.868312	0.671514	2.25259	0.941324	0.681247	1.29172
F17AG	7.60202	7.277	2.09713	23.6203	3.62496	0.308082	1.96652	0.706833		F17AG	1	1	5.77277	7.66412	0.173227	0.130478	0.151853	0.104335		F17AG	36.6981	37.8376	36.0114	50.2676	1.01907	0.752725	0.885896	0.535133		CA	0.21655	0.915408	0.392807	0.939061	1.04642	0.926889	0.970789
GAL1	11.5023	22.2282	15.5629	3.86313	0.739087	5.75394	3.24651	0.638529		GAL1	1	1	9.03135	8.66676	0.110725	0.115383	0.113054	0.0147831		GAL1	23.2344	42.3537	64.224	53.3928	0.361771	0.793247	0.577509	0.332523		PTL-2	0.218409	0.232399	0.00913615	15.5231	2.2252	4.59817	7.44882
GAL1-S	91.5674	100.018	98.4547	103.753	0.930045	0.964004	0.947024	0.183679		GAL1-S	63.16	44.347	18.1235	22.4872	3.48499	1.9721	2.72854	0.212323		GAL1-S	265.243	336.529	51.5947	49.1545	5.1409	6.84636	5.99363	0.0930117		PPL	0.232442	0.0984363	0.5	6.95197	0.422075	3.303	3.55901
GAL2	5.21849	1	8.60927	11.9205	0.606148	0.0838889	0.345018	0.30834		GAL2	1	1	9.66939	15.6397	0.103419	0.06394	0.0836796	0.159629		GAL2	1	6.64744	7.41349	29.3329	0.134889	0.226621	0.180755	0.324596		PSL1A	0.232954	0.125468	0.177011	0.52506	0.345903	0.0499065	0.306956
GAL3	155.489	157.548	135.43	151.987	1.14811	1.03659	1.09235	0.327829		GAL3	62.1748	67.5057	28.241	31.6135	2.20158	2.13534	2.16846	0.0178496		GAL3	415.075	374.346	19.7431	24.4096	21.0237	15.336	18.1799	0.0387295		LSL-N	0.2354	0.703592	0.659281	1.16224	0.840895	1.05481	1.01931
GAL3C-S	60.1481	22.1199	6.84327	14.128	8.78938	1.56567	5.17753	0.405259		GAL3C-S	36.7084	38.6248	30.4856	33.4251	1.20412	1.15556	1.17984	0.056873		GAL3C-S	401.949	391.397	267.749	290.995	1.50121	1.34503	1.42312	0.0910884		LPA	0.240286	0.0782761	0.436867	23.7022	0.127836	0.172052	8.00069
GAL7-S	16.9195	19.8447	1	1	16.9195	19.8447	18.3821	0.0534427		GAL7-S	5.93812	2.05135	9.44152	9.58964	0.628937	0.213913	0.421425	0.223039		GAL7-S	37.1624	1	100.1	99.4577	0.371253	0.0100545	0.190654	0.13791		HAA	0.242829	0.250404	#DIV/0!	1.23536	0.135924	1	0.790427
GAL9	2.50993	11.9357	1	1	2.50993	11.9357	7.22282	0.412652		GAL9	22.9427	21.3098	13.8623	9.92005	1.65505	2.14815	1.9016	0.0715138		GAL9	45.9834	1	107.335	117.952	0.42841	0.00847801	0.218444	0.192434		BANLEC	0.253087	0.43853	0.28813	9.37673	1.08066	1.96286	4.14008
GHA	34.0376	34.3626	22.5166	11.479	1.51167	2.99351	2.25259	0.203072		GHA	7.74655	15.6281	13.2242	12.0507	0.585786	1.29686	0.941324	0.868312		GHA	41.2563	2.8489	32.1584	35.7974	1.28291	0.0795842	0.681247	0.671514		PALa	0.258792	0.0624705	0.179884	3.83714	25.5019	15.1834	14.8408
GNA	646.28	536.746	814.901	670.751	0.793079	0.800217	0.796648	0.0725051		GNA	93.1071	84.8072	111.904	68.9049	0.832023	1.23079	1.0314	0.947008		GNA	1375.22	1415.27	1644.73	1388.76	0.836136	1.01909	0.927612	0.562418		RPA	0.266598	0.407925	0.0268509	0.761756	3.50827	3.63544	2.63516
GRFT	408.035	316.161	188.631	137.859	2.16314	2.29337	2.22825	0.0655599		GRFT	62.6742	59.7051	61.613	59.9495	1.01722	0.995924	1.00657	0.644084		GRFT	360.038	416.088	134.306	106.179	2.68073	3.91873	3.29973	0.099234		PHA-L	0.278615	0.435421	0.34111	1.08648	1.52329	1.06741	1.22573
GS-I	5.00181	67.6237	3.09051	7.61589	1.61844	8.87928	5.24886	0.47973		GS-I	1	1	1	0.0645639	1	15.4885	8.24426	0.5		GS-I	24.7538	20.8708	19.3578	37.467	1.27875	0.557046	0.917897	0.700123		AMA	0.284095	0.578262	0.00183575	1.31725	1.23561	1.95825	1.5037
GS-II	526.237	587.884	315.673	388.742	1.66703	1.51227	1.58965	0.0177429		GS-II	109.855	100.314	33.6758	26.0193	3.26214	3.85537	3.55876	0.00797441		GS-II	991.861	888.921	465.109	514.556	2.13254	1.72755	1.93004	0.106649		CNL	0.294048	0.131774	0.0870039	0.860013	0.528862	1.49401	0.96096
HAA	12.4774	9.44384	9.49227	8.16777	1.31448	1.15623	1.23536	0.242829		HAA	1	1	5.38539	11.6063	0.185688	0.08616	0.135924	0.250404		HAA	1	1	1	1	1	1	1	#DIV/0!		ACL	0.296407	0.075298	0.927469	0.572191	1.21907	0.960051	0.917105
HHA	520.495	314.753	486.424	476.049	1.07004	0.661178	0.865611	0.632527		HHA	115.254	144.931	88.9121	102.733	1.29626	1.41076	1.35351	0.144736		HHA	1091.38	955.564	891.209	934.021	1.22461	1.02307	1.12384	0.431747		SSA	0.301492	0.5	0.671519	0.0324731	0.670314	0.737732	0.480173
HMA	35.5544	28.2954	31.3466	21.0817	1.13423	1.34218	1.23821	0.163833		HMA	1	1	5.82974	6.85517	0.171534	0.145875	0.158705	0.0609096		HMA	6.94288	8.67333	56.6893	110.589	0.122473	0.0784287	0.100451	0.210915		GAL2	0.30834	0.159629	0.324596	0.345018	0.0836796	0.180755	0.203151
IRA	1	155.381	1	0.883002	1	175.969	88.4845	0.5		IRA	1	1	3.63077	2.06984	0.275424	0.483128	0.379276	0.254113		IRA	118.789	96.715	85.3728	101.641	1.39141	0.951534	1.17147	0.593179		ASA	0.312612	0.0484805	0.0729773	1.60677	0.929402	1.28584	1.274
Jacalin	0.234742	1	3.64238	5.51876	0.0644473	0.1812	0.122824	0.0886634		Jacalin	1	1	3.5738	17.2803	0.279814	0.0578692	0.168842	0.400181		Jacalin	96.9682	74.2614	106.693	89.0974	0.908854	0.833486	0.87117	0.130624		CAA	0.318932	0.466434	0.66356	0.641471	0.807751	1.11004	0.853087
LAL	8.90213	1	1	1	8.90213	1	4.95107	0.5		LAL	1	1	9.36177	3.927	0.106817	0.254647	0.180732	0.28564		LAL	75.3165	55.6064	119.279	118.723	0.63143	0.468371	0.549901	0.112683		CPA	0.326295	0.386955	0.322178	1.58531	0.786972	3.41232	1.9282
LBA	8.5771	0.884796	1	1	8.5771	0.884796	4.73095	0.509679		LBA	1	1	4.75874	5.80695	0.21014	0.172207	0.191173	0.07752		LBA	49.6131	15.5529	190.56	109.047	0.260354	0.142625	0.20149	0.127138		GAL3	0.327829	0.0178496	0.0387295	1.09235	2.16846	18.1799	7.1469
LcH A	115.619	106.627	47.0199	58.7196	2.45895	1.81586	2.13741	0.1119		LcH A	96.9803	79.9082	43.5313	30.9641	2.22783	2.58067	2.40425	0.0279909		LcH A	105.831	106.338	49.9251	53.3928	2.11981	1.99162	2.05571	0.0173146		RS-FUC	0.342542	0.184026	0.0469012	2.10653	14.3465	11.7776	9.41021
LEA	9.55218	7.81871	50.5519	80.574	0.188958	0.0970377	0.142998	0.173305		LEA	25.0076	19.2584	28.6512	31.9325	0.872829	0.603097	0.737963	0.321789		LEA	103.89	147.489	166.971	102.84	0.622203	1.43416	1.02818	0.892121		ACG	0.344232	0.419622	0.388556	1.26261	0.875757	1.16032	1.09956
LENTIL	600.668	414.536	482.781	331.788	1.24418	1.2494	1.24679	0.110377		LENTIL	88.9639	69.7999	129.177	83.1697	0.688696	0.839247	0.763972	0.295661		LENTIL	727.821	628.679	35.7545	1	20.356	628.679	324.517	0.0310346		ABL	0.362346	0.450501	0.202436	0.513057	0.786612	1.1747	0.824791
Lotus	121.687	3.59336	23.8411	25.2759	5.10407	0.142165	2.62312	0.638832		Lotus	0.674787	1	14.1357	6.51336	0.0477363	0.153531	0.100633	0.25252		Lotus	37.4156	73.3751	1	44.6593	37.4156	1.643	19.5293	0.0749133		MNA-M	0.367608	0.283608	0.0532587	1.21123	1.2435	2.37159	1.60877
LPA	198.61	458.956	8.4989	19.0949	23.3689	24.0355	23.7022	0.240286		LPA	1	1	8.7693	7.06025	0.114034	0.141638	0.127836	0.0782761		LPA	1	1	3.3036	24.1527	0.3027	0.0414032	0.172052	0.436867		PTL-1	0.370493	0.0518248	0.165214	60.4262	3.90642	2.26151	22.198
LSL-N	395.468	372.282	363.907	300.773	1.08673	1.23775	1.16224	0.2354		LSL-N	112.055	50.4066	88.2854	122.182	1.26924	0.412555	0.840895	0.703592		LSL-N	554.143	572.84	572.265	501.927	0.968333	1.14128	1.05481	0.659281		NPA	0.382987	0.854712	0.20342	0.794478	0.995933	1.23114	1.00718
MAA	5.00181	9.22716	167.108	92.7152	0.0299315	0.0995215	0.0647265	0.197229		MAA	50.6765	12.1192	47.2684	23.4671	1.0721	0.516433	0.794267	0.685739		MAA	373.248	448.839	519.95	502.783	0.717854	0.89271	0.805282	0.275679		UEA-II	0.392975	0.498475	0.208464	5.09572	6.58431	0.203283	3.9611
MALECTIN	176.074	218.003	109.272	103.642	1.61135	2.10341	1.85738	0.163433		MALECTIN	47.4645	31.1481	14.6712	19.9464	3.23522	1.56159	2.3984	0.290451		MALECTIN	250.64	391.861	1	1	250.64	391.861	321.251	0.138155		SNA-II	0.395658	0.0614535	0.299886	0.258599	0.341362	0.224043	0.274668
MNA-G	116.161	88.7505	56.2914	14.128	2.06357	6.28187	4.17272	0.0695542		MNA-G	28.7999	23.8605	1.15835	5.63605	24.8628	4.23354	14.5482	0.128918		MNA-G	142.888	121.954	20.4709	45.8152	6.98006	2.66187	4.82097	0.145777		GAL3C-S	0.405259	0.056873	0.0910884	5.17753	1.17984	1.42312	2.5935
MNA-M	542.813	456.898	401.325	427.042	1.35255	1.06991	1.21123	0.367608		MNA-M	99.9629	78.5991	73.8383	69.3606	1.35381	1.1332	1.2435	0.283608		MNA-M	790.792	699.585	323.361	304.481	2.44554	2.29763	2.37159	0.0532587		GAL9	0.412652	0.0715138	0.192434	7.22282	1.9016	0.218444	3.11429
MOA	47.3637	37.8295	28.1457	85.9823	1.6828	0.439969	1.06139	0.741746		MOA	33.9957	23.0642	29.9273	20.8921	1.13595	1.10397	1.11996	0.187812		MOA	356.746	301.161	325.244	284.574	1.09685	1.05829	1.07757	0.191457		TL	0.431343	0.0112167	0.0759564	1.40684	1.50696	1.17399	1.3626
MPL	74.0159	101.427	1	10.596	74.0159	9.57213	41.794	0.0689472		MPL	17.342	15.2637	5.15752	4.98661	3.36247	3.06093	3.2117	0.0539324		MPL	69.9986	235.784	31.2166	32.8434	2.24235	7.17903	4.71069	0.379791		CSA	0.450706	0.150743	0.12769	1.13736	0.140597	0.480125	0.586027
NPA	218.545	288.317	332.45	309.492	0.657375	0.931581	0.794478	0.382987		NPA	110.705	92.1893	85.1978	133.131	1.29939	0.692472	0.995933	0.854712		NPA	1478.37	1519.01	1293.51	1151.33	1.14292	1.31935	1.23114	0.20342		GS-I	0.47973	0.5	0.700123	5.24886	8.24426	0.917897	4.80368
ORYSATA	268.599	391.242	72.1854	79.5806	3.72096	4.9163	4.31863	0.142004		ORYSATA	127.481	109.531	16.403	15.8561	7.77178	6.90782	7.3398	0.0539781		ORYSATA	325.387	331.169	1	1	325.387	331.169	328.278	0.00562363		UEA I	0.5	0.917887	0.0862605	2.02582	1.67619	0.00823968	1.23675
PA-IIL	82.0332	1	9.71302	6.07064	8.44569	0.164727	4.30521	0.544563		PA-IIL	47.9638	49.2729	9.17947	13.1672	5.22512	3.74208	4.4836	0.0227611		PA-IIL	285.165	239.118	10.5815	13.2358	26.9493	18.066	22.5076	0.061756		VFA	0.5	0.5	0.370885	2.01	0.529368	0.42579	0.988386
PA-IL	1	1	1	40.9492	1	0.0244205	0.51221	0.5		PA-IL	1	1	15.1156	7.43624	0.066157	0.134477	0.100317	0.22765		PA-IL	111.065	187.036	107.635	91.3664	1.03187	2.0471	1.53948	0.477183		IRA	0.5	0.254113	0.593179	88.4845	0.379276	1.17147	30.0117
PALa	183.442	308.794	83.0022	56.5121	2.21008	5.4642	3.83714	0.258792		PALa	34.0092	28.7864	1	1.69385	34.0092	16.9946	25.5019	0.0624705		PALa	407.182	241.313	18.8013	27.706	21.6571	8.70975	15.1834	0.179884		LAL	0.5	0.28564	0.112683	4.95107	0.180732	0.549901	1.8939
PHA-E	305.002	473.257	596.689	463.024	0.511157	1.0221	0.766629	0.522325		PHA-E	110.948	61.7835	84.0128	67.3212	1.32061	0.917742	1.11918	0.629085		PHA-E	1021.87	970.927	1128.98	1145.59	0.905124	0.847532	0.876328	0.149795		PA-IL	0.5	0.22765	0.477183	0.51221	0.100317	1.53948	0.717337
PHA-L	497.201	370.766	444.481	351.656	1.11861	1.05434	1.08648	0.278615		PHA-L	90.8533	118.115	84.9129	59.7558	1.06996	1.97662	1.52329	0.435421		PHA-L	909.602	809.447	822.069	787.135	1.10648	1.02835	1.06741	0.34111		DISCOIDIN I	0.5	0.151037	0.1718	1.12712	0.105749	0.161211	0.464694
PHA-P	388.209	175.749	272.185	203.863	1.42627	0.862095	1.14418	0.651343		PHA-P	95.5903	85.0636	76.6412	75.2056	1.24724	1.13108	1.18916	0.19461		PHA-P	783.786	879.003	634.984	694.748	1.23434	1.26521	1.24977	0.0675107		VVA-M	0.502755	0.5736	0.222496	0.584085	0.843809	0.00952554	0.47914
PNA	66.2152	3.48501	3.97351	8.60927	16.6642	0.404798	8.53448	0.552294		PNA	1	1	7.09443	1.62549	0.140956	0.615199	0.378077	0.43489		PNA	1	1	75.5262	71.4592	0.0132404	0.013994	0.0136172	0.0178535		LBA	0.509679	0.07752	0.127138	4.73095	0.191173	0.20149	1.70787
PPL	4.67678	9.22716	1	1	4.67678	9.22716	6.95197	0.232442		PPL	1	1	2.60534	2.17239	0.383827	0.460323	0.422075	0.0984363		PPL	1	1	1	0.17838	1	5.606	3.303	0.5		CALSEPA	0.517344	0.194743	0.847357	0.836909	0.837121	0.981217	0.885082
PSA	605.76	461.557	286.313	171.634	2.11572	2.6892	2.40246	0.0308199		PSA	127.886	125.294	49.8319	58.6392	2.56634	2.1367	2.35152	0.0500421		PSA	600.148	685.615	1	1	600.148	685.615	642.881	0.0423208		WFA	0.51771	0.306603	0.0298122	0.650876	1.67655	2.47422	1.60055
PSL1A	4.13507	4.13507	9.71302	6.62252	0.425724	0.624395	0.52506	0.232954		PSL1A	1	2.2133	4.6448	4.6448	0.215294	0.476511	0.345903	0.125468		PSL1A	6.98509	0.358751	72.1869	117.653	0.0967639	0.00304924	0.0499065	0.177011		VRA	0.519991	0.5	0.199012	2.61388	0.92332	0.159596	1.23227
PTL-1	117.353	33.6042	1	9.60265	117.353	3.49947	60.4262	0.370493		PTL-1	35.5343	33.132	12.9508	6.53615	2.7438	5.06905	3.90642	0.0518248		PTL-1	237.894	215.651	84.3882	126.557	2.81904	1.70398	2.26151	0.165214		PHA-E	0.522325	0.629085	0.149795	0.766629	1.11918	0.876328	0.920711
PTL-2	308.685	630.571	25.7174	33.1126	12.003	19.0432	15.5231	0.218409		PTL-2	115.807	69.665	44.4428	37.7661	2.60575	1.84464	2.2252	0.232399		PTL-2	350.879	383.42	63.5819	104.253	5.51854	3.6778	4.59817	0.00913615		AAL	0.53918	0.149535	0.0920489	2.4617	1.27716	3.26776	2.33554
PWA	3.26833	2.83496	50.9934	29.3598	0.0640932	0.0965591	0.0803261	0.177059		PWA	1.44404	2.10533	6.82099	8.57561	0.211706	0.245503	0.228604	0.0585849		PWA	53.6227	45.0971	28.0913	154.599	1.90887	0.291704	1.10029	0.645829		PA-IIL	0.544563	0.0227611	0.061756	4.30521	4.4836	22.5076	10.4321
RCA 120	28.6204	38.6963	42.7152	29.6909	0.670029	1.3033	0.986666	0.861944		RCA 120	153.635	168.346	139.397	112.337	1.10214	1.49857	1.30036	0.341519		RCA 120	2355.2	2230.44	2476.25	1842.99	0.951113	1.21023	1.08067	0.69279		PNA	0.552294	0.43489	0.0178535	8.53448	0.378077	0.0136172	2.97539
RCA 60	36.3127	46.1719	529.801	388.411	0.0685403	0.118874	0.0937071	0.113982		RCA 60	115.739	116.212	123.082	81.9962	0.940347	1.41728	1.17881	0.634569		RCA 60	889.385	815.103	1137.25	914.713	0.782052	0.891102	0.836577	0.256731		ECA	0.555624	0.627572	0.478908	12.2472	1.70056	1.57412	5.17397
RPA	54.4059	33.2792	61.5894	51.9868	0.883365	0.640147	0.761756	0.266598		RPA	14.265	83.8895	4.98661	20.1857	2.86066	4.15588	3.50827	0.407925		RPA	221.518	206.113	75.6975	47.442	2.92636	4.34452	3.63544	0.0268509		DISCOIDIN II	0.569081	0.573451	0.373053	1.13642	1.06491	0.875708	1.02568
RS-FUC	292.217	71.3073	141.391	33.223	2.06674	2.14633	2.10653	0.342542		RS-FUC	43.8476	73.9296	5.7158	3.51683	7.6713	21.0216	14.3465	0.184026		RS-FUC	814.934	690.553	76.4253	53.564	10.6631	12.8921	11.7776	0.0469012		Con A	0.60397	0.28109	0.0563891	1.60031	1.54339	8.60804	3.91724
SAMB	89.8339	94.3843	111.258	71.1921	0.807435	1.32577	1.0666	0.974789		SAMB	31.3506	91.3391	17.7703	36.9913	1.76422	2.4692	2.11671	0.344115		SAMB	454.622	378.144	212.009	156.91	2.14435	2.40994	2.27715	0.0293216		SNA-I	0.605335	0.368976	0.130245	0.783249	0.817291	2.34717	1.3159
SBA	140.755	160.69	486.755	474.503	0.28917	0.338648	0.313909	0.0310306		SBA	51.7831	62.8496	88.9691	43.6338	0.582035	1.44039	1.01121	0.80364		SBA	541.819	540.342	319.122	394.299	1.69784	1.37039	1.53411	0.130483		BC2LCN	0.628203	0.121559	0.626843	4.46801	0.152346	1.00567	1.87534
SHA	31.1123	0.234742	1	11.0375	31.1123	0.0212676	15.5668	0.719283		SHA	1	1	0.235468	0.634245	4.24685	1.57668	2.91177	0.215927		SHA	15.6373	42.4381	143.682	152.415	0.108833	0.278437	0.193635	0.0482308		HHA	0.632527	0.144736	0.431747	0.865611	1.35351	1.12384	1.11432
SJA	1	1	1	1	1	1	1	#DIV/0!		SJA	1	1	1	1.97869	1	0.505384	0.752692	0.5		SJA	50.8371	31.4645	129.982	129.468	0.391108	0.243029	0.317068	0.0675185		GAL1	0.638529	0.0147831	0.332523	3.24651	0.113054	0.577509	1.31236
SNA-I	96.7678	53.8642	84.2163	129.029	1.14904	0.417459	0.783249	0.605335		SNA-I	37.7071	21.6741	50.6067	24.3672	0.7451	0.889481	0.817291	0.368976		SNA-I	202.525	228.398	106.35	81.8623	1.90432	2.79002	2.34717	0.130245		Lotus	0.638832	0.25252	0.0749133	2.62312	0.100633	19.5293	7.41768
SNA-II	1	2.61827	19.2053	5.62914	0.052069	0.465129	0.258599	0.395658		SNA-II	1	1	3.12945	2.75346	0.319545	0.363179	0.341362	0.0614535		SNA-II	1	51.0059	198.223	115.127	0.00504481	0.443042	0.224043	0.299886		WGA	0.641944	0.659619	0.113202	0.905545	1.98049	2.66841	1.85148
SSA	1	1	61.5894	20.5298	0.0162366	0.0487097	0.0324731	0.301492		SSA	1	1	2.93576	1	0.340627	1	0.670314	0.5		SSA	29.6497	154.326	152.073	120.521	0.19497	1.28049	0.737732	0.671519		EEL	0.650743	0.569454	0.862209	1.89838	1.22771	5.01299	2.71303
STL	95.3593	41.6215	21.9647	85.3201	4.34149	0.487828	2.41466	0.84188		STL	6.05958	1	9.99981	14.2041	0.60597	0.0704024	0.338186	0.315382		STL	240.384	130.184	83.1466	135.334	2.89109	0.961951	1.92652	0.520841		PHA-P	0.651343	0.19461	0.0675107	1.14418	1.18916	1.24977	1.19437
TL	618.761	351.589	358.389	323.4	1.72651	1.08717	1.40684	0.431343		TL	107.925	90.4214	74.2713	57.9328	1.45312	1.5608	1.50696	0.0112167		TL	743.31	721.448	621.798	625.951	1.19542	1.15256	1.17399	0.0759564		F17AG	0.706833	0.104335	0.535133	1.96652	0.151853	0.885896	1.00142
UDA	48.7721	115.944	69.6468	80.4636	0.700278	1.44095	1.07062	0.838554		UDA	81.9056	99.5445	87.8525	87.0663	0.932308	1.14332	1.03781	0.78313		UDA	814.554	872.081	740.942	638.28	1.09935	1.3663	1.23282	0.305815		SHA	0.719283	0.215927	0.0482308	15.5668	2.91177	0.193635	6.22406
UEA I	3.05164	1	1	1	3.05164	1	2.02582	0.5		UEA I	12.0517	1	3.68774	11.857	3.26804	0.0843386	1.67619	0.917887		UEA I	1	1	106.907	140.342	0.00935393	0.00712543	0.00823968	0.0862605		MOA	0.741746	0.187812	0.191457	1.06139	1.11996	1.07757	1.0863
UEA-II	8.90213	5.97689	1	4.63576	8.90213	1.2893	5.09572	0.392975		UEA-II	1	47.1946	0.896299	3.91561	1.1157	12.0529	6.58431	0.498475		UEA-II	29.3965	23.9519	180.328	98.3446	0.163016	0.243551	0.203283	0.208464		ABA	0.827343	0.803685	0.315104	1.38312	1.01533	0.56819	0.988879
VFA	1	1	0.331126	1	3.02	1	2.01	0.5		VFA	1	0.296906	1	5.05497	1	0.0587354	0.529368	0.5		VFA	55.0999	50.7105	219.286	84.4738	0.251269	0.60031	0.42579	0.370885		UDA	0.838554	0.78313	0.305815	1.07062	1.03781	1.23282	1.11375
VRA	6.41026	4.24341	6.51214	1	0.984355	4.24341	2.61388	0.519991		VRA	1	1	1	1.18114	1	0.84664	0.92332	0.5		VRA	48.2203	1	159.693	58.0164	0.301956	0.0172365	0.159596	0.199012		STL	0.84188	0.315382	0.520841	2.41466	0.338186	1.92652	1.55979
VVA	46.0636	20.3864	57.2848	36.3135	0.804115	0.561401	0.682758	0.109265		VVA	50.3661	75.7111	66.7971	63.9714	0.754016	1.18351	0.968765	0.894945		VVA	129.593	133.012	78.8227	71.8873	1.64411	1.85029	1.7472	0.0587415		RCA 120	0.861944	0.341519	0.69279	0.986666	1.30036	1.08067	1.12256
VVA-M	1	1	28.0353	0.883002	0.0356693	1.1325	0.584085	0.502755		VVA-M	1.45754	1	0.976054	5.14612	1.4933	0.194321	0.843809	0.5736		VVA-M	1	1	164.402	77.1102	0.00608264	0.0129684	0.00952554	0.222496		SAMB	0.974789	0.344115	0.0293216	1.0666	2.11671	2.27715	1.82015
WFA	11.2857	17.8945	122.848	14.7903	0.0918671	1.20989	0.650876	0.51771		WFA	16.1814	42.66	10.3074	23.9228	1.56987	1.78323	1.67655	0.306603		WFA	132.759	176.737	42.9897	95.0054	3.08816	1.86029	2.47422	0.0298122		BPA	#DIV/0!	0.435309	0.605151	1	0.276585	1.38185	0.886147
WGA	59.9314	99.693	211.921	65.2318	0.282801	1.52829	0.905545	0.641944		WGA	93.6604	19.2449	27.3067	36.2393	3.42994	0.53105	1.98049	0.659619		WGA	307.154	456.479	112.044	175.876	2.74136	2.59546	2.66841	0.113202		SJA	#DIV/0!	0.5	0.0675185	1	0.752692	0.317068	0.68992

[truncated: 1 more sheets: FigureS4d]
